# Supplementary material for: A bottom-up approach from medium-sized bilayer boron nanoclusters to bilayer borophene nanomaterials
Source: Royal Society of Chemistry journal article supplement (doi:10.1039/d2nr02950b), 2022-01-01
Supplement: d2nr02950b1.pdf [file d2nr02950b1.pdf]

## Supporting information

# A bottom-up approach from medium-sized bilayer boron nanoclusters to bilayer borophene nanomaterials

Qiao-Qiao Yan, Ting Zhang, Yuan-Yuan Ma, Qiang Chen,<sup>\*</sup> Yue-Wen Mu,<sup>\*</sup> and Si-Dian Li<sup>\*</sup>

*Nanocluster Laboratory, Institute of Molecular Science, Shanxi University, Taiyuan 030006, China E-mail: Chenqiang@sxu.edu.cn, ywmu@sxu.edu.cn, and lisidian@sxu.edu.cn*

## Table of Contents

**Fig. S1** Low-lying isomers of (a) B<sub>84</sub>, (b) B<sub>86</sub> (c) B<sub>88</sub>, (d) B<sub>90</sub>, (e) B<sub>92</sub>, (f) B<sub>94</sub>, (g) B<sub>96</sub>, (h) B<sub>98</sub>, and (i) B<sub>128</sub>.

**Fig. S2** Top and side views of the optimized BL *D*<sub>2</sub> B<sub>828</sub> (**XIII**).

**Fig. S3** AdNDP bonding patterns of *C*<sub>2v</sub> B<sub>86</sub> (**II**).

**Fig.S4** Born-Oppenheimer molecular dynamics simulations of *C*<sub>2v</sub> B<sub>86</sub> (**II**) and *C*<sub>2v</sub> B<sub>96</sub> (**VII**).

**Fig. S5** Simulated IR, Raman, and UV-Vis of *C*<sub>2v</sub> B<sub>86</sub> (**II**) and *C*<sub>2v</sub> B<sub>96</sub> (**VII**)

**Table S1** Optimized cartesian coordinates of *C*<sub>1</sub> B<sub>84</sub> (**I**), *C*<sub>2v</sub> B<sub>86</sub> (**II**), *C*<sub>1</sub> B<sub>88</sub> (**III**), *C*<sub>1</sub> B<sub>90</sub> (**IV**), *C*<sub>1</sub> B<sub>92</sub> (**V**), *C*<sub>1</sub> B<sub>94</sub> (**VI**), *C*<sub>2v</sub> B<sub>96</sub> (**VII**), *C*<sub>1</sub> B<sub>98</sub> (**VIII**), *C*<sub>2</sub> B<sub>128</sub> (**IX**), *D*<sub>2h</sub> B<sub>214</sub> (**X**), *C*<sub>2v</sub> B<sub>260</sub> (**XI**), *D*<sub>2h</sub> B<sub>372</sub> (**XII**), and *D*<sub>2</sub> B<sub>828</sub> (**XIII**).

**Fig. S1** Low-lying isomers of (a) B<sub>84</sub>, (b) B<sub>86</sub> (c) B<sub>88</sub>, (d) B<sub>90</sub>, (e) B<sub>92</sub>, (f) B<sub>94</sub>, (g) B<sub>96</sub>, (h) B<sub>98</sub> and (i) B<sub>128</sub> with their relative energies indicated in eV at PBE0/6-31G(d), PBE0/6-311+G(d) (in parentheses), and TPSSh/6-31G(d) (in square brackets) levels, respectively.

(a) B<sub>84</sub>

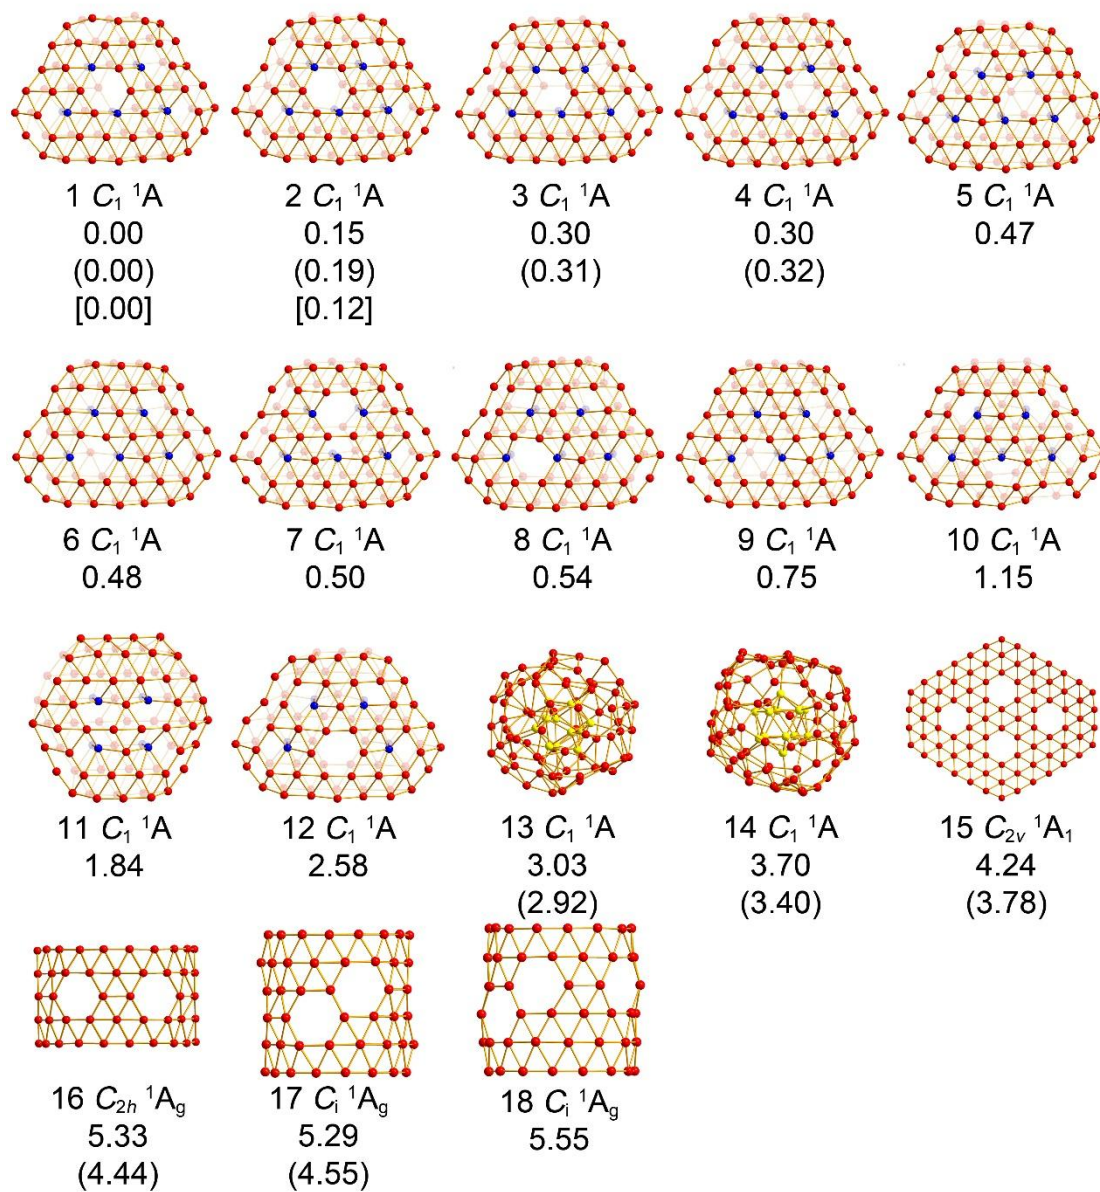

(b) B<sub>86</sub>

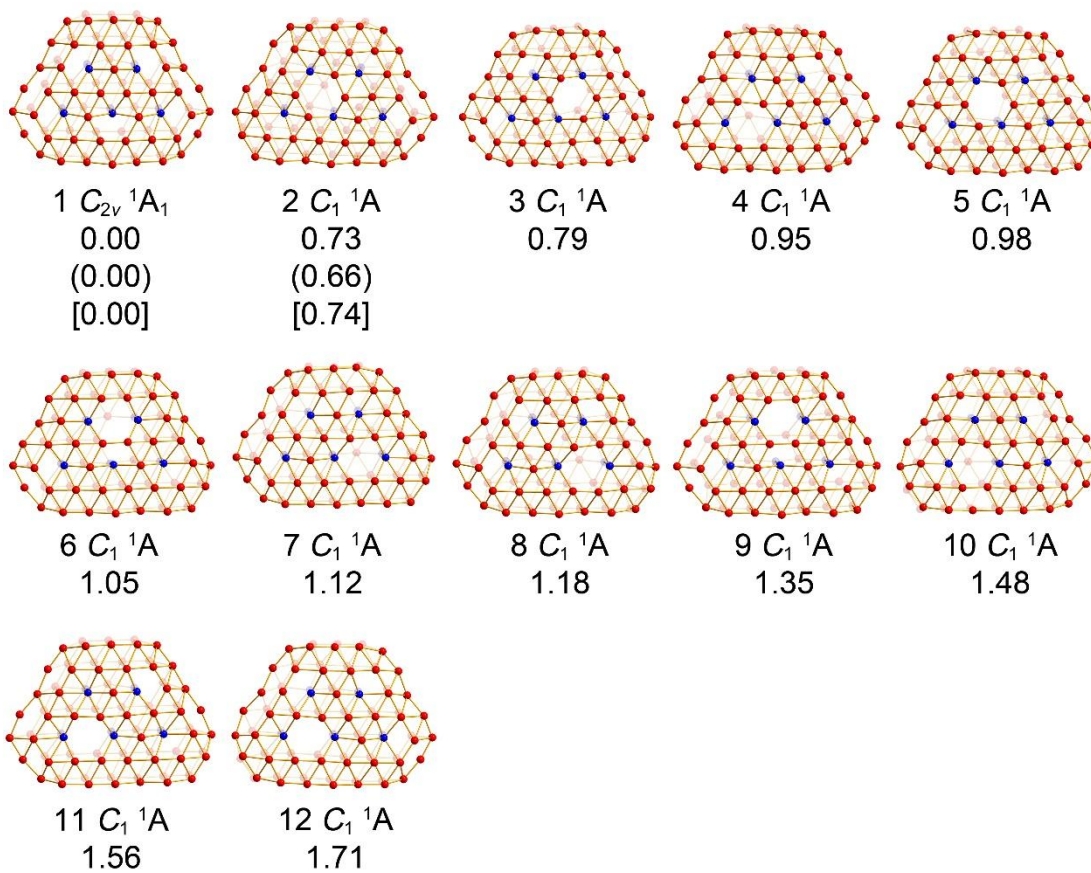

(c) B<sub>88</sub>

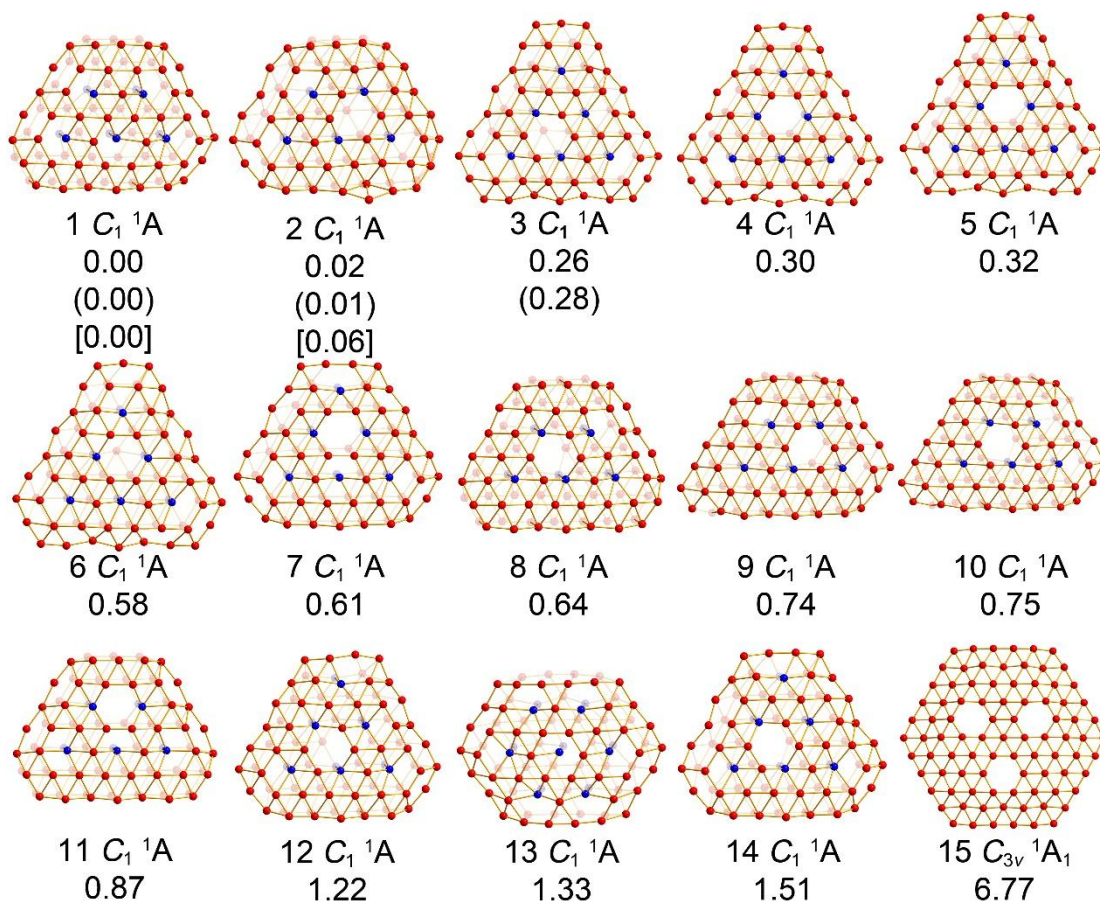

(d) B<sub>90</sub>

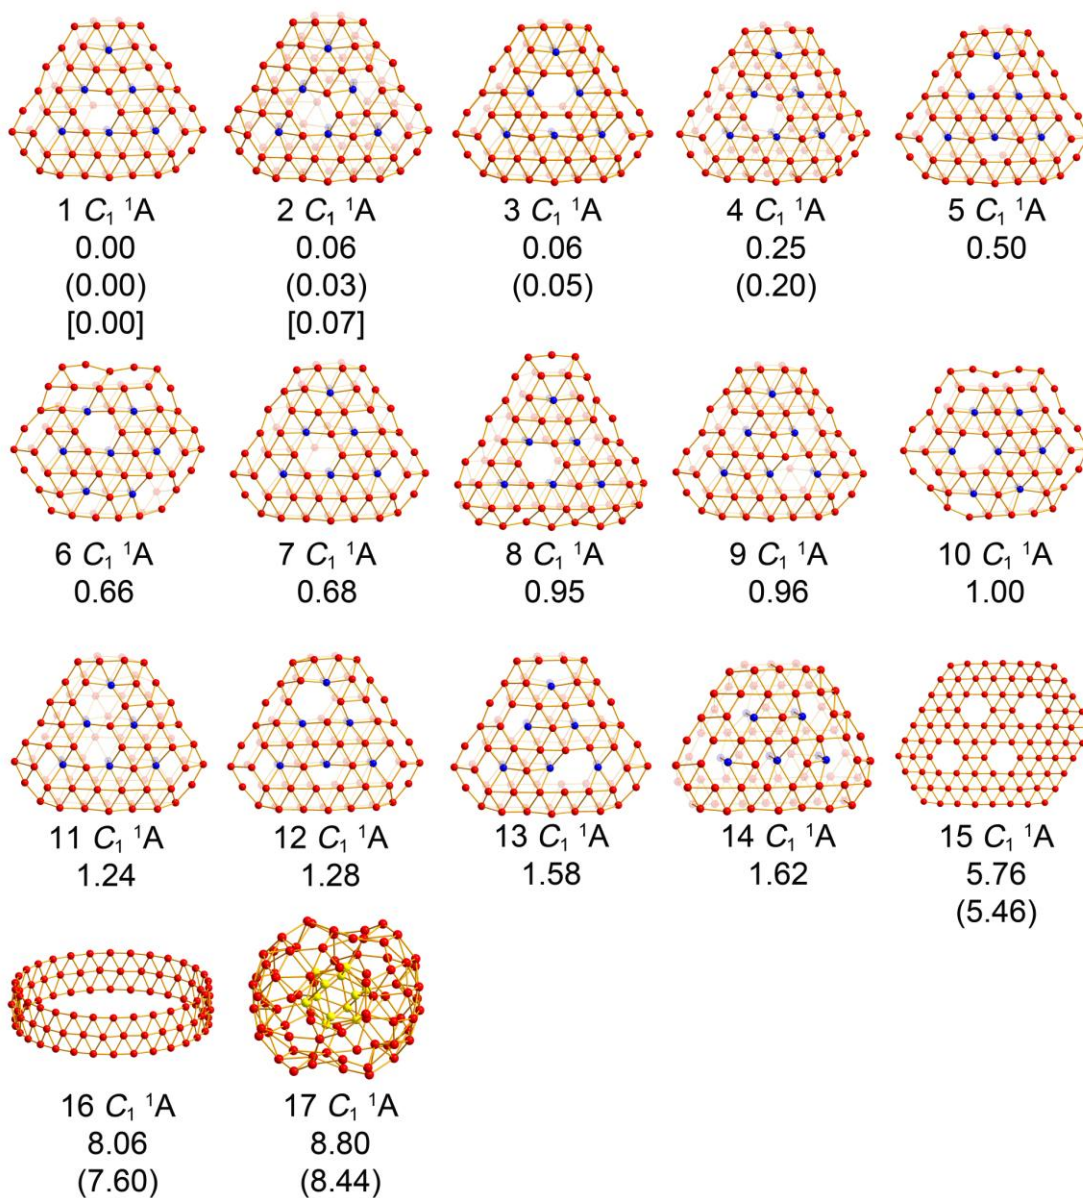

(e) B<sub>92</sub>

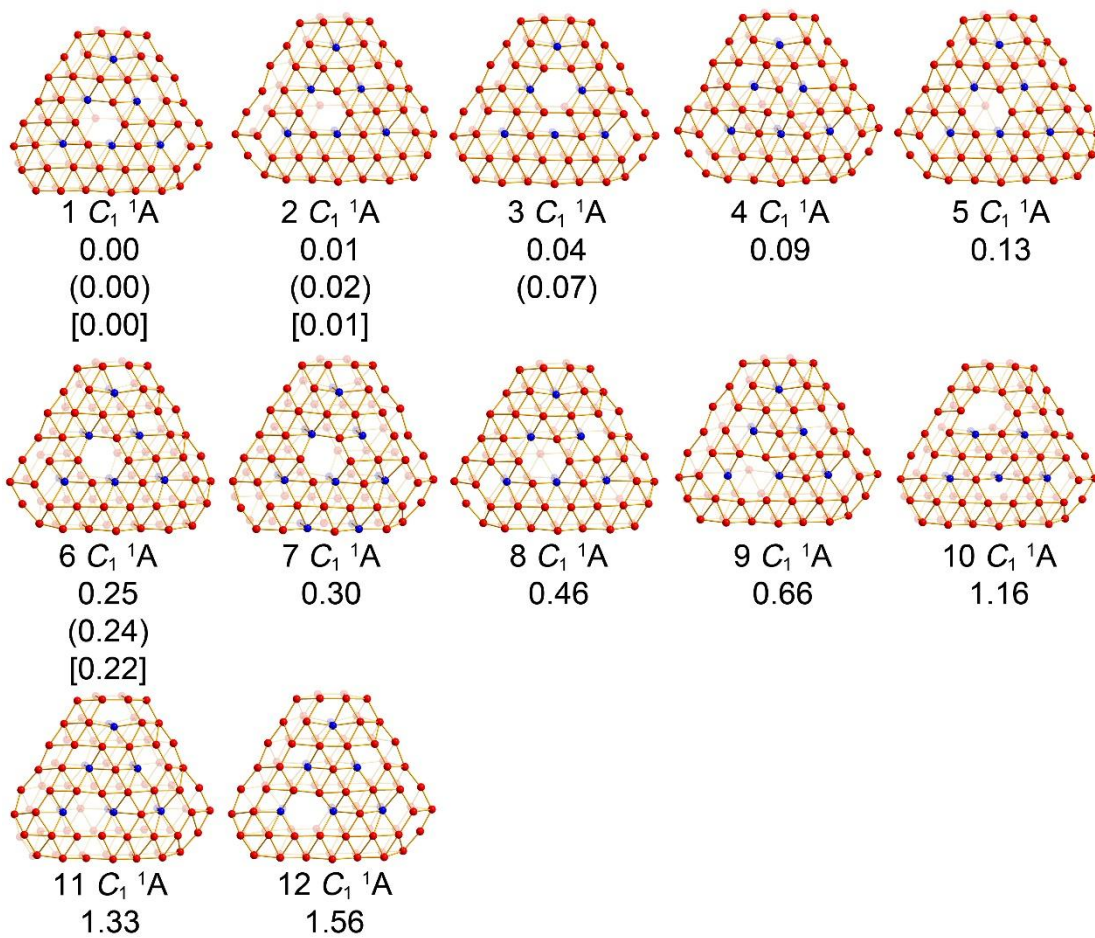

(f) B<sub>94</sub>

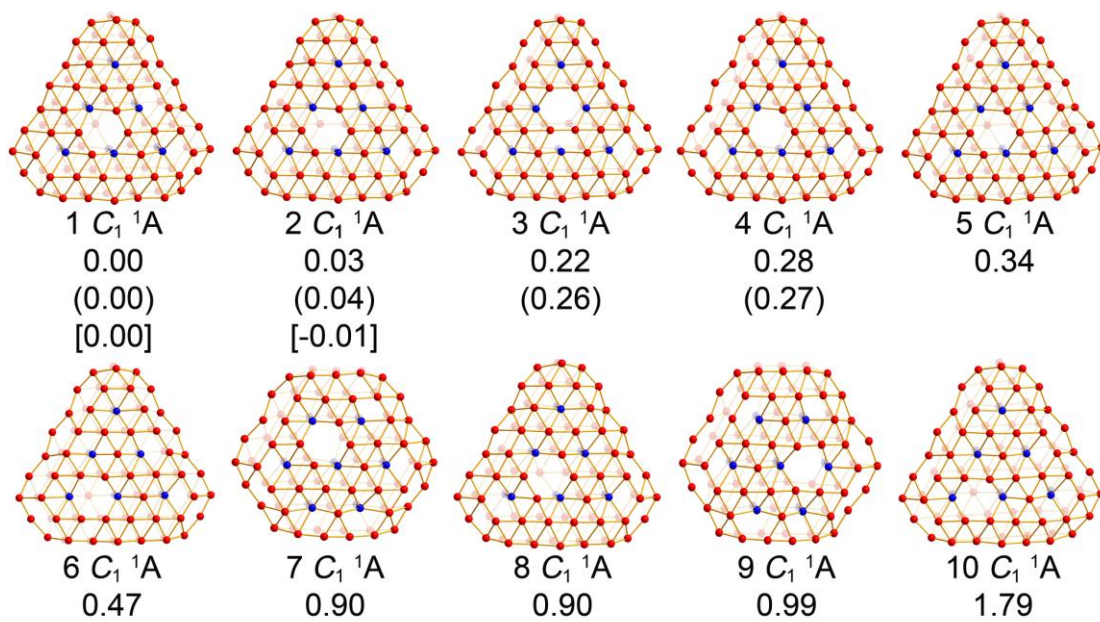

(g) B<sub>96</sub>

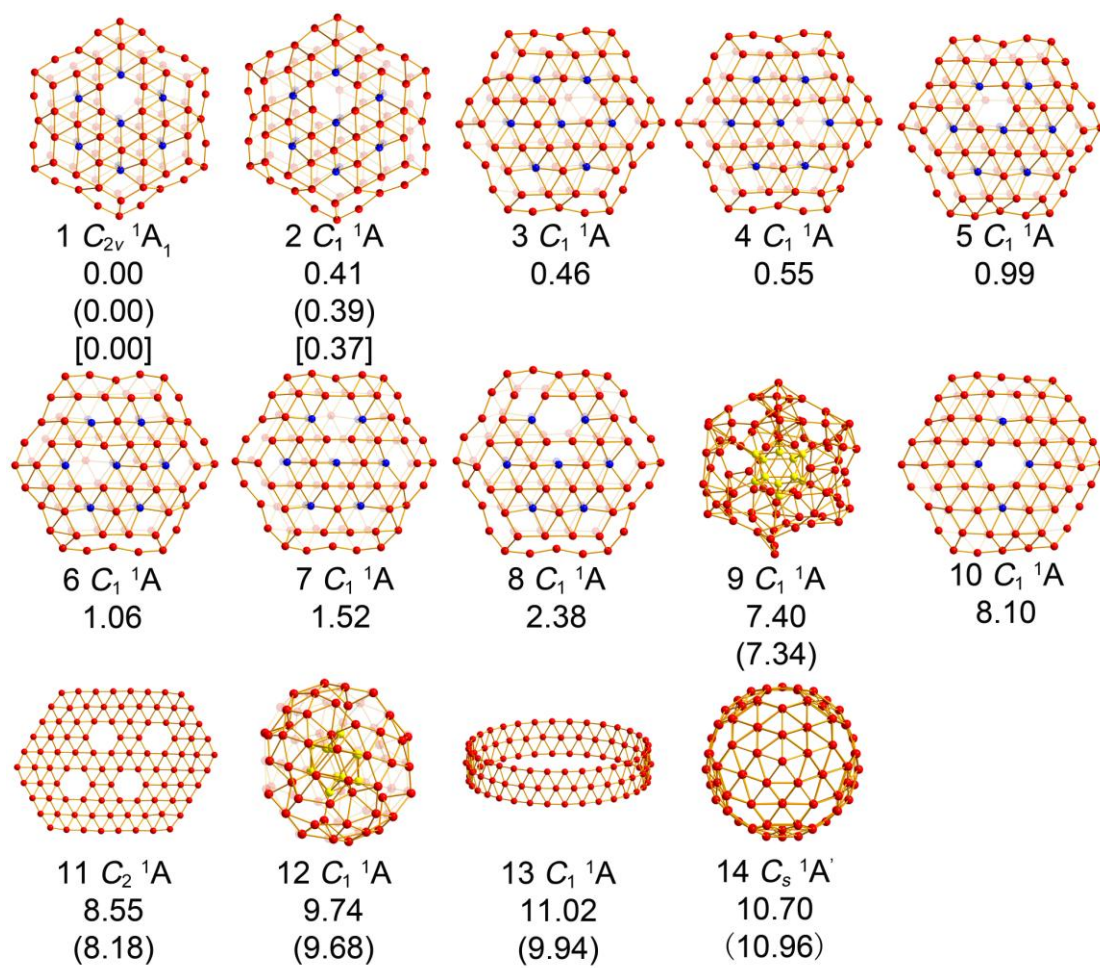



(h) B<sub>98</sub>

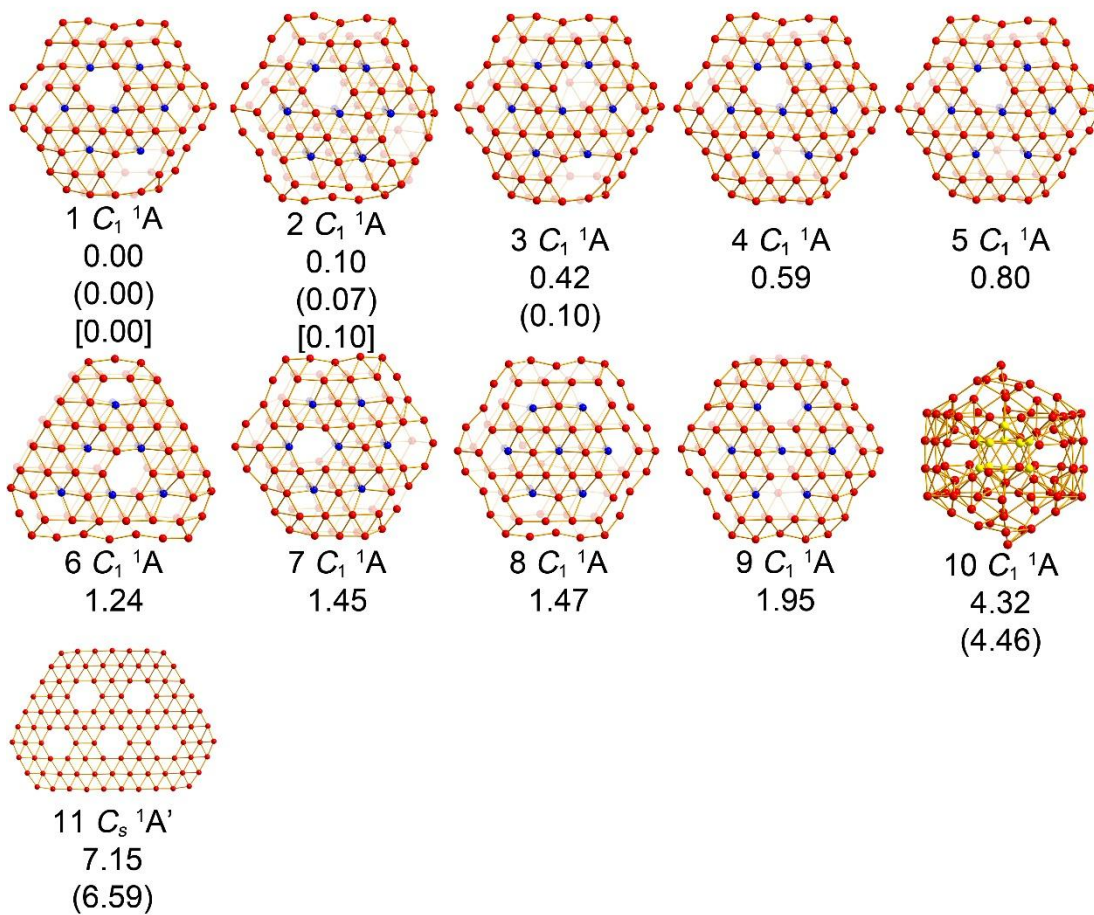

(i)  $B_{128}$

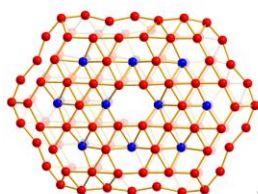

1  $C_2$   $1A$   
0.00

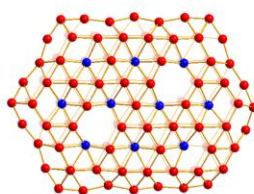

2  $C_1$   $1A$   
-0.17

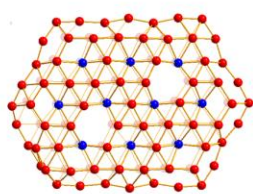

3  $C_1$   $1A$   
-0.15

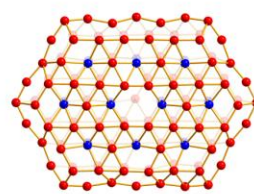

4  $C_1$   $1A$   
-0.10

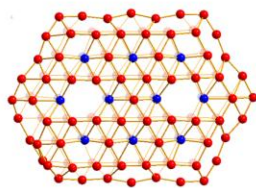

5  $C_1$   $1A$   
-0.04

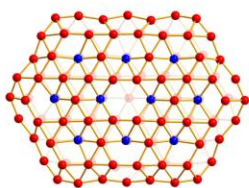

6  $C_1$   $1A$   
0.07

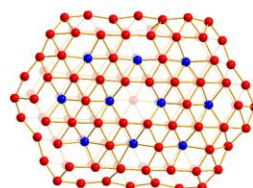

7  $C_1$   $1A$   
0.15

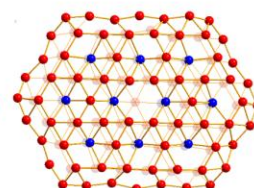

8  $C_1$   $1A$   
0.22

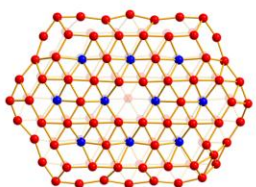

9  $C_1$   $1A$   
0.38

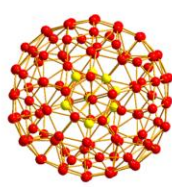

10  $C_{2h}$   $1A_g$   
1.99

**Fig. S2** Top and side views of the optimized BL  $D_{2h}$   $B_{372}$  (**XIII**), with the inward-buckled B atoms interconnected by interlayer B-B  $\sigma$  bonds colored in blue, the  $B_{72}$  BL hexagonal prisms at the center of highlighted in a purple dotted circle.

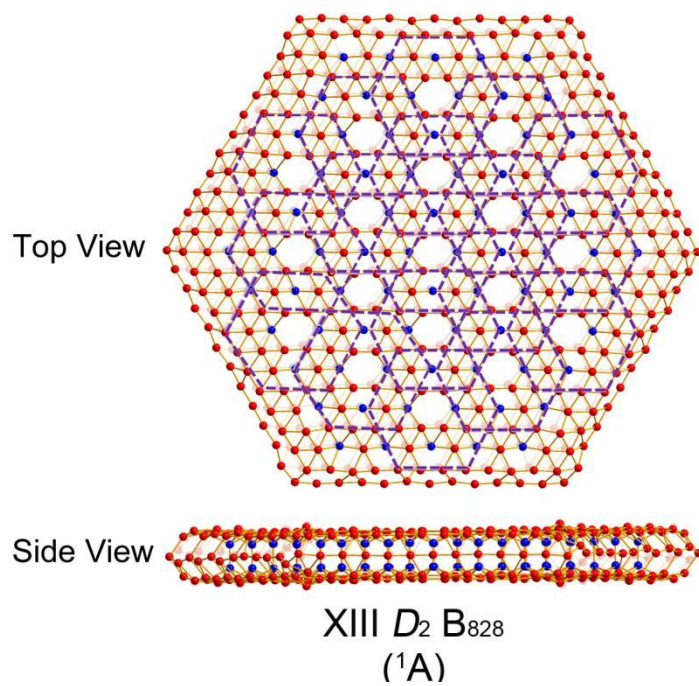

**Fig. S3** AdNDP bonding patterns of  $C_{2v}$   $B_{86}$  (**II**)

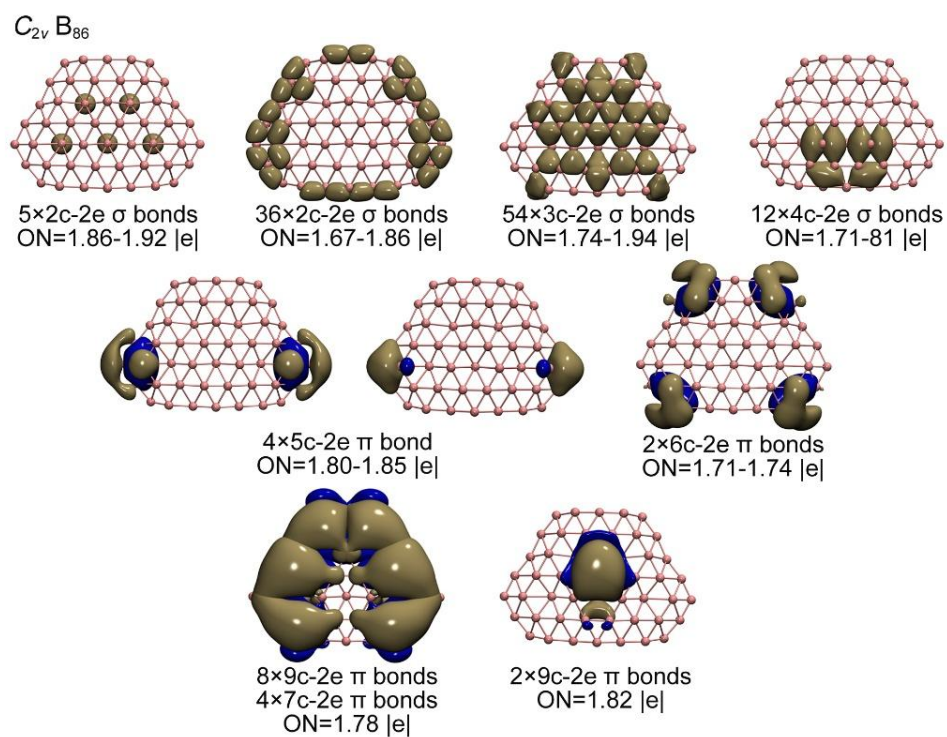

**Fig. S4** Born-Oppenheimer molecular dynamics (BOMD) simulations of (a)  $C_{2v} B_{86}$  (II) and (b)  $C_{2v} B_{96}$  (VII).

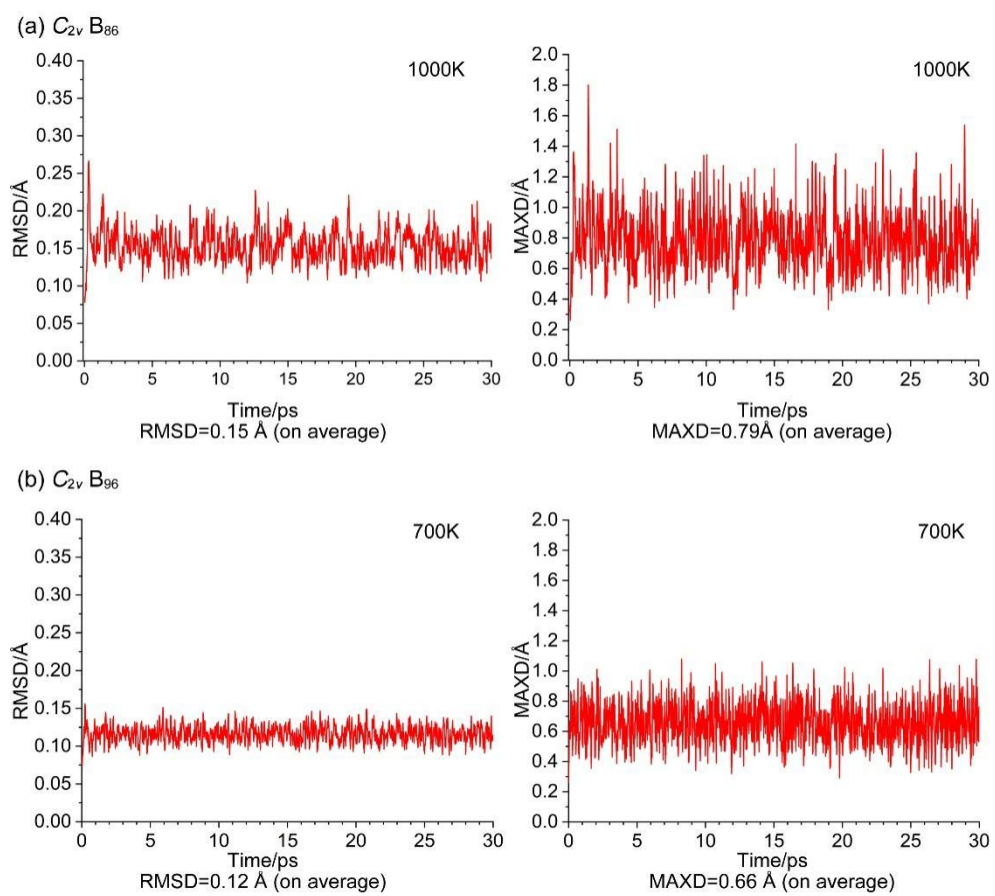

**Fig. S5** Simulated IR, Raman, and UV-Vis of (a)  $C_{2v} B_{86}$  (**II**) and (b)  $C_{2v} B_{96}$  (**VII**) at PBE0/6-31G(d) level.

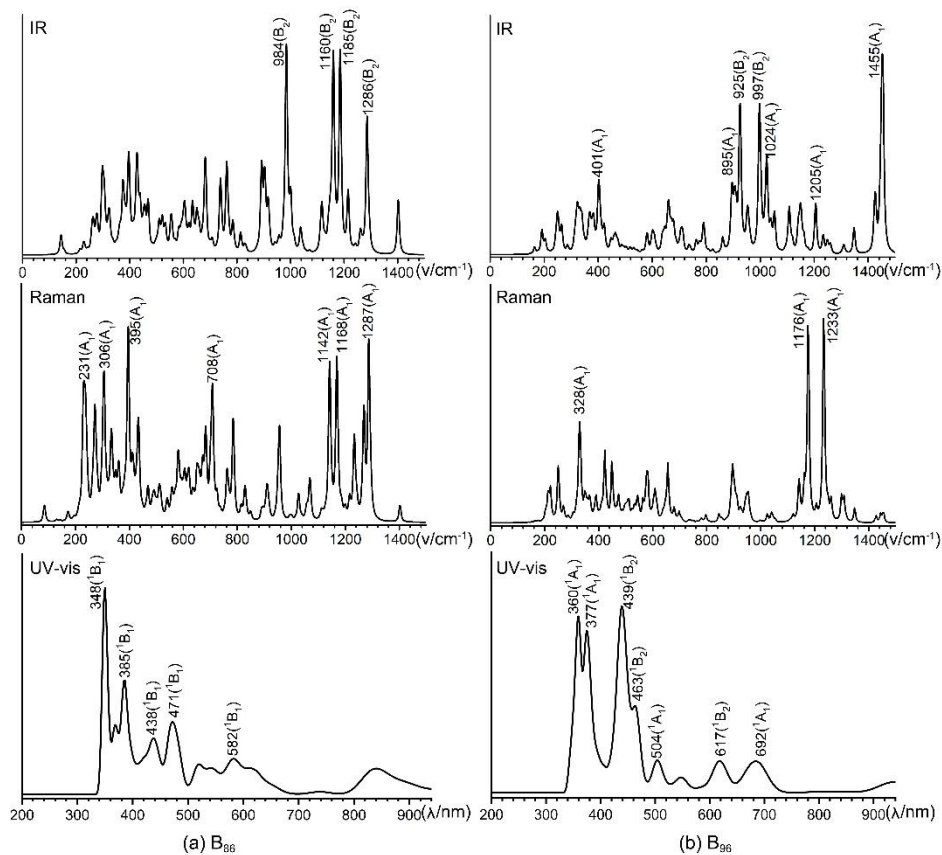

**Table S1** Optimized cartesian coordinates of (a)  $C_1 B_{84}$  (**I**), (b)  $C_{2v} B_{86}$  (**II**), (c)  $C_1 B_{88}$  (**III**), (d)  $C_1 B_{90}$  (**IV**), (e)  $C_1 B_{92}$  (**V**), (f)  $C_1 B_{94}$  (**VI**), (g)  $C_{2v} B_{96}$  (**VII**) and (h)  $C_1 B_{98}$  (**VIII**) at PBE0/6-311+G(d), (i)  $C_2 B_{128}$  (**IX**) at PBE0/6-31G(d), (j)  $D_{2h} B_{214}$  (**X**), (k)  $C_{2v} B_{260}$  (**XI**), (l)  $D_{2h} B_{372}$  (**XII**) at PBE0/6-31G, and (m)  $D_2 B_{828}$  (**XIII**) at PBE.

(a)  $C_1 B_{84}$  (**I**)

|   |             |             |             |
|---|-------------|-------------|-------------|
| B | 1.54459600  | -0.92758500 | -1.81133200 |
| B | -0.02072600 | -1.04637900 | -0.88448100 |
| B | -0.73550400 | 0.37476100  | -1.80091300 |
| B | 2.45182700  | -2.37317600 | -1.63117000 |
| B | -0.83223500 | -2.49817100 | -1.70107600 |
| B | -2.44213600 | 0.42591100  | -1.64086600 |
| B | -2.47692900 | -2.46387800 | -1.64003300 |
| B | -4.11001200 | -2.44923300 | -1.41380300 |
| B | -1.58634400 | -1.01917100 | -1.75772600 |
| B | -4.98455400 | -1.03569400 | -1.36448500 |
| B | -4.13341800 | 0.38278800  | -1.47402300 |
| B | -3.11048200 | -0.97722300 | -0.85589900 |
| B | 1.58637400  | -1.01915100 | 1.75773100  |
| B | 0.02074200  | -1.04637300 | 0.88454000  |
| B | 0.73553300  | 0.37479200  | 1.80095500  |
| B | 2.47696600  | -2.46385300 | 1.64003000  |
| B | -2.37981400 | 0.45356900  | 1.72408600  |
| B | -2.45180600 | -2.37319100 | 1.63118800  |
| B | -4.10158500 | -2.40602200 | 1.39919900  |
| B | -1.54459900 | -0.92760600 | 1.81136200  |
| B | -4.97483700 | -1.02084900 | 1.24030700  |
| B | -4.04509200 | 0.41187900  | 1.38130200  |
| B | -3.05785300 | -0.93335500 | 0.81311500  |
| B | -3.39280000 | 1.83194400  | -1.44506500 |
| B | -0.86494000 | 3.21169200  | -1.73164300 |
| B | -1.53344100 | 1.73129300  | -0.84267100 |
| B | 0.81604000  | 3.20848800  | -1.70418400 |
| B | -2.58594300 | 3.21947900  | -1.46788400 |
| B | 1.52339900  | 1.80936400  | -0.87593300 |
| B | 2.37980800  | 0.45359300  | -1.72407600 |
| B | 2.40883300  | 3.36414300  | -1.38122400 |
| B | 4.04509800  | 0.41194300  | -1.38132100 |
| B | -0.00259400 | 1.77941200  | -1.88027200 |
| B | 4.97483700  | -1.02079000 | -1.24030200 |
| B | 3.22263000  | 1.86555700  | -1.41382600 |
| B | 4.10161900  | -2.40598800 | -1.39922400 |
| B | 3.05791500  | -0.93334200 | -0.81316600 |

|   |             |             |             |
|---|-------------|-------------|-------------|
| B | -3.22266000 | 1.86552800  | 1.41380000  |
| B | -0.81605800 | 3.20846800  | 1.70410900  |
| B | -1.52343000 | 1.80932300  | 0.87595300  |
| B | 0.86490300  | 3.21170900  | 1.73159900  |
| B | -2.40886300 | 3.36408600  | 1.38113000  |
| B | 1.53340800  | 1.73128900  | 0.84268400  |
| B | 2.44215100  | 0.42593600  | 1.64088900  |
| B | 2.58591400  | 3.21950700  | 1.46778300  |
| B | 4.13342800  | 0.38286000  | 1.47395000  |
| B | 0.00256300  | 1.77941400  | 1.88033100  |
| B | 4.98457200  | -1.03562500 | 1.36442500  |
| B | 3.39277000  | 1.83198200  | 1.44507600  |
| B | 4.11003900  | -2.44915900 | 1.41379700  |
| B | 3.11047000  | -0.97718200 | 0.85584800  |
| B | 4.49586200  | 1.69012200  | -0.10709300 |
| B | 3.90846200  | 3.19187800  | -0.57832700 |
| B | -3.90858600 | 3.19186800  | 0.57843500  |
| B | -4.49587700 | 1.69009100  | 0.10709800  |
| B | 5.55450800  | 0.44342300  | -0.47635900 |
| B | -5.55449400 | 0.44336100  | 0.47639300  |
| B | -0.80811600 | -2.41780000 | 1.77082900  |
| B | 0.83226600  | -2.49815100 | 1.70109600  |
| B | 0.80814500  | -2.41779200 | -1.77079400 |
| B | -6.16922100 | -0.90841700 | -0.04817400 |
| B | 6.16926900  | -0.90836800 | 0.04813200  |
| B | 5.52282100  | -2.32233800 | 0.06702300  |
| B | -5.52275900 | -2.32238300 | -0.06705700 |
| B | 4.48589200  | -3.57691600 | -0.01524400 |
| B | 3.24159100  | -3.80100500 | -1.13659200 |
| B | 1.57230700  | -3.89322600 | 0.88568800  |
| B | -0.01290100 | -3.95962800 | 1.44203900  |
| B | -1.57227100 | -3.89325500 | -0.88566000 |
| B | -3.24153000 | -3.80103000 | 1.13656700  |
| B | -4.48584200 | -3.57696700 | 0.01523700  |
| B | 2.88491200  | 4.32718400  | 0.02782900  |
| B | 1.38806600  | 4.82708400  | -0.50061300 |
| B | -0.14362000 | 4.61366500  | -0.90341600 |
| B | -1.77370800 | 4.59823900  | -1.20339200 |
| B | -2.88501200 | 4.32711100  | -0.02784600 |
| B | 1.77366500  | 4.59829500  | 1.20343600  |
| B | 0.14355600  | 4.61362600  | 0.90333100  |
| B | -1.38822700 | 4.82701900  | 0.50079100  |
| B | 1.58800400  | -3.86485600 | -0.94956400 |



|   |             |             |             |
|---|-------------|-------------|-------------|
| B | 0.01295200  | -3.95964000 | -1.44196700 |
| B | -1.58794500 | -3.86486400 | 0.94959400  |
| B | -3.23443000 | -3.86705100 | -1.05251200 |
| B | 3.23448300  | -3.86699300 | 1.05250000  |

(b)  $C_1 B_{88}$  (III)

|   |             |             |             |
|---|-------------|-------------|-------------|
| B | -1.80907800 | 1.62318400  | -1.04832400 |
| B | -0.87773100 | 0.00000000  | -0.96526900 |
| B | -1.83903500 | -0.83350400 | 0.40344400  |
| B | -1.66474000 | 2.48618400  | -2.44827300 |
| B | -1.69105200 | -0.81022100 | -2.52415900 |
| B | -1.64335700 | -2.48222600 | 0.42639900  |
| B | -1.83903500 | 0.83350400  | 0.40344400  |
| B | -1.66474000 | -2.48618400 | -2.44827300 |
| B | -1.39355900 | -4.10797500 | -2.42465000 |
| B | -1.80907800 | -1.62318400 | -1.04832400 |
| B | -1.28034000 | -5.01097400 | -1.01425900 |
| B | -1.42060100 | -4.13766600 | 0.41458000  |
| B | -0.83565500 | -3.07631800 | -0.97326400 |
| B | 1.80907800  | 1.62318400  | -1.04832400 |
| B | 0.87773100  | 0.00000000  | -0.96526900 |
| B | 1.83903500  | -0.83350400 | 0.40344400  |
| B | 1.66474000  | 2.48618400  | -2.44827300 |
| B | 1.64335700  | -2.48222600 | 0.42639900  |
| B | 1.83903500  | 0.83350400  | 0.40344400  |
| B | 1.66474000  | -2.48618400 | -2.44827300 |
| B | 1.39355900  | -4.10797500 | -2.42465000 |
| B | 1.80907800  | -1.62318400 | -1.04832400 |
| B | 1.28034000  | -5.01097400 | -1.01425900 |
| B | 1.42060100  | -4.13766600 | 0.41458000  |
| B | 0.83565500  | -3.07631800 | -0.97326400 |
| B | -1.36197700 | -3.34600000 | 1.89052000  |
| B | -1.64199100 | -0.87886600 | 3.27793000  |
| B | -0.85603200 | -1.50921300 | 1.70757600  |
| B | -1.64199100 | 0.87886600  | 3.27793000  |
| B | -1.33583100 | -2.51380600 | 3.28023800  |
| B | -0.85603200 | 1.50921300  | 1.70757600  |
| B | -1.64335700 | 2.48222600  | 0.42639900  |
| B | -1.33583100 | 2.51380600  | 3.28023800  |
| B | -1.42060100 | 4.13766600  | 0.41458000  |
| B | -1.88936700 | 0.00000000  | 1.86150600  |
| B | -1.28034000 | 5.01097400  | -1.01425900 |
| B | -1.36197700 | 3.34600000  | 1.89052000  |
| B | -1.39355900 | 4.10797500  | -2.42465000 |
| B | -0.83565500 | 3.07631800  | -0.97326400 |
| B | 1.36197700  | -3.34600000 | 1.89052000  |
| B | 1.64199100  | -0.87886600 | 3.27793000  |
| B | 0.85603200  | -1.50921300 | 1.70757600  |

|   |             |             |             |
|---|-------------|-------------|-------------|
| B | 1.64199100  | 0.87886600  | 3.27793000  |
| B | 1.33583100  | -2.51380600 | 3.28023800  |
| B | 0.85603200  | 1.50921300  | 1.70757600  |
| B | 1.64335700  | 2.48222600  | 0.42639900  |
| B | 1.33583100  | 2.51380600  | 3.28023800  |
| B | 1.42060100  | 4.13766600  | 0.41458000  |
| B | 1.88936700  | 0.00000000  | 1.86150600  |
| B | 1.28034000  | 5.01097400  | -1.01425900 |
| B | 1.36197700  | 3.34600000  | 1.89052000  |
| B | 1.39355900  | 4.10797500  | -2.42465000 |
| B | 0.83565500  | 3.07631800  | -0.97326400 |
| B | 0.00000000  | 4.56158400  | 1.64875900  |
| B | 0.00000000  | 3.86775400  | 3.17184200  |
| B | 0.00000000  | -3.86775400 | 3.17184200  |
| B | 0.00000000  | -4.56158400 | 1.64875900  |
| B | 0.00000000  | 5.57636300  | 0.37608800  |
| B | 0.00000000  | -5.57636300 | 0.37608800  |
| B | 1.69105200  | -0.81022100 | -2.52415900 |
| B | 1.69105200  | 0.81022100  | -2.52415900 |
| B | -1.69105200 | 0.81022100  | -2.52415900 |
| B | 0.00000000  | -6.24579300 | -1.01805700 |
| B | 0.00000000  | 6.24579300  | -1.01805700 |
| B | 0.00000000  | 5.52362900  | -2.38218300 |
| B | 0.00000000  | -5.52362900 | -2.38218300 |
| B | 0.00000000  | 4.48322200  | -3.62727300 |
| B | -1.09614600 | 3.24113300  | -3.85474400 |
| B | 0.94141900  | 1.58352600  | -3.93146500 |
| B | 1.47547800  | 0.00000000  | -3.98472700 |
| B | -0.94141900 | -1.58352600 | -3.93146500 |
| B | 1.09614600  | -3.24113300 | -3.85474400 |
| B | 0.00000000  | -4.48322200 | -3.62727300 |
| B | 0.00000000  | 2.87363900  | 4.45898300  |
| B | -1.14554200 | 1.62483900  | 4.68946700  |
| B | -0.95951700 | 0.00000000  | 4.71829600  |
| B | -1.14554200 | -1.62483900 | 4.68946700  |
| B | 0.00000000  | -2.87363900 | 4.45898300  |
| B | 1.14554200  | 1.62483900  | 4.68946700  |
| B | 0.95951700  | 0.00000000  | 4.71829600  |
| B | 1.14554200  | -1.62483900 | 4.68946700  |
| B | -0.94141900 | 1.58352600  | -3.93146500 |
| B | -1.47547800 | 0.00000000  | -3.98472700 |
| B | 0.94141900  | -1.58352600 | -3.93146500 |
| B | -1.09614600 | -3.24113300 | -3.85474400 |

|   |            |            |             |
|---|------------|------------|-------------|
| B | 1.09614600 | 3.24113300 | -3.85474400 |
|---|------------|------------|-------------|

(c)  $C_1 B_{88}$  (III)

|   |             |             |             |
|---|-------------|-------------|-------------|
| B | 1.63956000  | -0.72420900 | -1.86181600 |
| B | 0.00899800  | -0.89046700 | -0.88141600 |
| B | -1.01609500 | 0.33571000  | -1.79630100 |
| B | 2.66263600  | -2.00604700 | -1.74762500 |
| B | -0.56973800 | -2.55402500 | -1.71114300 |
| B | -2.65754100 | 0.12069100  | -1.65028100 |
| B | 0.62910400  | 0.58937800  | -1.84923000 |
| B | -2.23950400 | -2.71993700 | -1.66068500 |
| B | -3.85021800 | -2.93583400 | -1.39746900 |
| B | -1.59552300 | -1.20777300 | -1.83137800 |
| B | -4.95612200 | -1.67544200 | -1.27024200 |
| B | -4.29667300 | -0.12843600 | -1.41379600 |
| B | -3.03870200 | -1.35059300 | -0.83896900 |
| B | 1.63944000  | -0.72428600 | 1.86084800  |
| B | 0.00898300  | -0.89058900 | 0.88081200  |
| B | -1.01640600 | 0.33548300  | 1.79733300  |
| B | 2.66290500  | -2.00616000 | 1.74659500  |
| B | -2.65737800 | 0.12036700  | 1.65051500  |
| B | 0.62883500  | 0.58876000  | 1.84774900  |
| B | -2.23873100 | -2.72066300 | 1.65968200  |
| B | -3.84942800 | -2.93730100 | 1.39686300  |
| B | -1.59543100 | -1.20815500 | 1.83073300  |
| B | -4.95501300 | -1.67520900 | 1.27362500  |
| B | -4.29769700 | -0.12917900 | 1.41726800  |
| B | -3.03919400 | -1.35088000 | 0.83982300  |
| B | -3.72881400 | 1.44114900  | -1.37582100 |
| B | -1.48150200 | 3.17741300  | -1.65720400 |
| B | -1.89022500 | 1.53498800  | -0.86116600 |
| B | 0.26392000  | 3.42585500  | -1.62530800 |
| B | -3.09863500 | 2.93652100  | -1.32579000 |
| B | 1.11162200  | 1.96610100  | -0.85909600 |
| B | 2.26701900  | 0.84753700  | -1.58681400 |
| B | 1.89182900  | 3.68573000  | -1.35170800 |
| B | 3.94326000  | 1.10819500  | -1.38505200 |
| B | -0.40126100 | 1.90641100  | -1.90224100 |
| B | 4.90027300  | -0.18740000 | -1.34140400 |
| B | 2.90807400  | 2.42962800  | -1.35928100 |
| B | 4.27526500  | -1.75224000 | -1.59963700 |
| B | 3.07358000  | -0.48421300 | -0.84503800 |
| B | -3.73092200 | 1.44001900  | 1.37904800  |
| B | -1.48221800 | 3.17678900  | 1.65845600  |
| B | -1.89026800 | 1.53490900  | 0.86175900  |

|   |             |             |             |
|---|-------------|-------------|-------------|
| B | 0.26337000  | 3.42512200  | 1.62430500  |
| B | -3.09899300 | 2.93415900  | 1.32601000  |
| B | 1.11149800  | 1.96577700  | 0.85896700  |
| B | 2.26678600  | 0.84763100  | 1.58723400  |
| B | 1.89191100  | 3.68690200  | 1.35324300  |
| B | 3.94313200  | 1.10827100  | 1.38536800  |
| B | -0.40161900 | 1.90589300  | 1.90142200  |
| B | 4.89944700  | -0.18788100 | 1.34084500  |
| B | 2.90732800  | 2.42950500  | 1.36001400  |
| B | 4.27597700  | -1.75268000 | 1.60101800  |
| B | 3.07361400  | -0.48412600 | 0.84506500  |
| B | 4.17931400  | 2.33939300  | 0.00044900  |
| B | 3.21642300  | 3.70586200  | 0.00008800  |
| B | -4.43869000 | 2.64193200  | -0.00267800 |
| B | -4.88548900 | 1.02405400  | 0.00086500  |
| B | 5.28501500  | 1.11799100  | 0.00079000  |
| B | -5.71189600 | -0.37724500 | -0.01095600 |
| B | -0.56954000 | -2.55422000 | 1.71026200  |
| B | 1.02525100  | -2.29019000 | 1.63732500  |
| B | 1.02475500  | -2.28983000 | -1.63697900 |
| B | -6.18360700 | -1.85603700 | 0.00268000  |
| B | 6.13939400  | -0.30149800 | -0.00009800 |
| B | 3.66513900  | -3.38063400 | -1.38652200 |
| B | 2.03748200  | -3.56888100 | 0.96232900  |
| B | 0.45510300  | -3.87437100 | 1.47453600  |
| B | -1.12556500 | -4.04189700 | -0.94139400 |
| B | -2.78018900 | -4.22206800 | 1.09292000  |
| B | 2.07988900  | 4.87492000  | 0.00070400  |
| B | 0.79169400  | 4.93435900  | -1.11124600 |
| B | -0.82152800 | 4.71604700  | -0.95726200 |
| B | -2.42589100 | 4.46169700  | -1.15078800 |
| B | -3.63123400 | 4.05377000  | 0.00020400  |
| B | 0.79093200  | 4.93422300  | 1.11274500  |
| B | -0.82236400 | 4.71555500  | 0.95779500  |
| B | -2.42708300 | 4.46058700  | 1.15192300  |
| B | 2.03720800  | -3.56890900 | -0.96321800 |
| B | 0.45443000  | -3.87362200 | -1.47566500 |
| B | -1.12473700 | -4.04212300 | 0.94003300  |
| B | -2.78120700 | -4.22131500 | -1.09420900 |
| B | 3.66552300  | -3.38070700 | 1.38617900  |
| B | 5.86339500  | -1.55722800 | -1.10703900 |
| B | 5.18564400  | -3.03842700 | -0.87353500 |
| B | 5.86371900  | -1.55763700 | 1.10533200  |

|   |             |             |            |
|---|-------------|-------------|------------|
| B | 5.18581500  | -3.03912500 | 0.87397300 |
| B | -4.04221500 | -4.17757600 | 0.00004300 |
| B | -5.24940600 | -3.08801800 | 0.00172500 |

(d)  $C_1 B_{90}$  (IV)

|   |             |             |             |
|---|-------------|-------------|-------------|
| B | 1.55177200  | -1.35808400 | -1.78530300 |
| B | -0.03101800 | -1.43845900 | -0.88992100 |
| B | -0.69715000 | 0.00617400  | -1.79397700 |
| B | 2.43091400  | -2.82190300 | -1.62855800 |
| B | -0.86124700 | -2.87029900 | -1.72354000 |
| B | -2.41446000 | 0.08712800  | -1.65115300 |
| B | -2.51136300 | -2.79431900 | -1.65069100 |
| B | -4.14502800 | -2.75050300 | -1.38637900 |
| B | -1.58055600 | -1.37573700 | -1.76496700 |
| B | -5.01605600 | -1.34331000 | -1.22983200 |
| B | -4.07867000 | 0.07630400  | -1.34069400 |
| B | -3.08018000 | -1.30515200 | -0.81465600 |
| B | 1.54998400  | -1.36624500 | 1.78036800  |
| B | -0.03043700 | -1.44564500 | 0.88806000  |
| B | -0.69809000 | -0.00629000 | 1.78897600  |
| B | 2.43152400  | -2.82894200 | 1.61254700  |
| B | -2.41192800 | 0.09012800  | 1.66089000  |
| B | -2.50285000 | -2.80297800 | 1.65671600  |
| B | -4.13234000 | -2.76411800 | 1.39717500  |
| B | -1.58448500 | -1.38008900 | 1.77448100  |
| B | -4.99226500 | -1.32660100 | 1.33774300  |
| B | -4.10663600 | 0.07922200  | 1.46245400  |
| B | -3.09513400 | -1.30851200 | 0.85512800  |
| B | -3.27066800 | 1.52095000  | -1.32843200 |
| B | -0.79162300 | 2.83582300  | -1.73677100 |
| B | -1.49983000 | 1.40529900  | -0.84675900 |
| B | 0.95668200  | 2.80245400  | -1.66654900 |
| B | -2.48783900 | 2.95661700  | -1.36379100 |
| B | 1.62946500  | 1.39893300  | -0.92014100 |
| B | 2.43437700  | 0.01031700  | -1.70104500 |
| B | 2.65502400  | 2.85924800  | -1.44015600 |
| B | 4.13085100  | -0.05312800 | -1.43135800 |
| B | 5.00095500  | -1.48090400 | -1.26723700 |
| B | 3.38186100  | 1.39170700  | -1.49606700 |
| B | 4.06919000  | -2.87194300 | -1.39253900 |
| B | 3.08150600  | -1.39350100 | -0.84554700 |
| B | -3.33165100 | 1.52243400  | 1.46234600  |
| B | -0.81217200 | 2.81763900  | 1.70274500  |
| B | -1.50226000 | 1.40228900  | 0.86410100  |
| B | 0.94087400  | 2.78830700  | 1.70647100  |
| B | -2.53434400 | 2.93365700  | 1.41966600  |
| B | 1.62351500  | 1.40224900  | 0.86827500  |



|   |             |             |             |
|---|-------------|-------------|-------------|
| B | 2.42133900  | 0.00330900  | 1.67931700  |
| B | 2.62289400  | 2.87283200  | 1.38112900  |
| B | 4.11101700  | -0.07837900 | 1.34390500  |
| B | 5.00317000  | -1.51693900 | 1.21927100  |
| B | 3.35379800  | 1.37026700  | 1.36769300  |
| B | 4.07167300  | -2.88180900 | 1.38183800  |
| B | 3.06295200  | -1.40222000 | 0.80896900  |
| B | 4.57513400  | 1.18550500  | 0.00256800  |
| B | 4.08396400  | 2.72959700  | 0.33048300  |
| B | -3.95967600 | 2.87934400  | -0.31890600 |
| B | -4.50719500 | 1.32735200  | -0.01113000 |
| B | 5.58243800  | -0.12719800 | 0.15198700  |
| B | -5.58571900 | 0.09769000  | -0.29601100 |
| B | -0.85892000 | -2.88034300 | 1.73832200  |
| B | 0.78246700  | -2.83243700 | 1.75870900  |
| B | 0.78372400  | -2.82491900 | -1.77426200 |
| B | -6.23287500 | -1.26951900 | 0.05810500  |
| B | 6.26655500  | -1.51065800 | -0.02301400 |
| B | 5.49794700  | -2.86302900 | -0.03430400 |
| B | -5.55794400 | -2.66375600 | 0.06822600  |
| B | 4.41366700  | -4.07077200 | -0.01274600 |
| B | 3.17790000  | -4.25826300 | -1.13659400 |
| B | 1.52098600  | -4.29338800 | 0.90918100  |
| B | -0.03910600 | -4.35185100 | 1.44036400  |
| B | -1.64052800 | -4.25011900 | -0.91577000 |
| B | -3.27847400 | -4.20188100 | 1.07851800  |
| B | -4.53718400 | -3.91672500 | 0.01042800  |
| B | 3.06898100  | 3.99405600  | 0.00673400  |
| B | 1.81628600  | 4.27870700  | -1.37806900 |
| B | 0.11360300  | 4.00175800  | -0.83128200 |
| B | -1.54415500 | 4.32050900  | -1.30055400 |
| B | -2.92408800 | 4.10425100  | -0.00947700 |
| B | 1.75392500  | 4.27948200  | 1.37963600  |
| B | 0.09172800  | 3.99818000  | 0.85460900  |
| B | -1.60295400 | 4.30217000  | 1.34238800  |
| B | 1.51984200  | -4.29095700 | -0.92925200 |
| B | -0.04476700 | -4.34276600 | -1.44686700 |
| B | -1.63195200 | -4.25748000 | 0.91751700  |
| B | -3.29688400 | -4.19201800 | -1.07931000 |
| B | 3.18275600  | -4.26457400 | 1.11507300  |
| B | 2.25914500  | 5.41545900  | 0.03498900  |
| B | -2.09118700 | 5.54308100  | -0.03716300 |
| B | 0.08778500  | 1.37541600  | 1.82954700  |

|   |             |            |             |
|---|-------------|------------|-------------|
| B | 0.07873100  | 1.39331700 | -1.85585900 |
| B | 0.93863800  | 5.66308200 | -0.97351400 |
| B | -0.70014000 | 5.73157100 | -0.93838100 |
| B | 0.88097600  | 5.65928400 | 0.97512800  |
| B | -0.75848500 | 5.71556600 | 0.97575100  |

(e)  $C_1 B_{92}$  (V)

|   |             |             |             |
|---|-------------|-------------|-------------|
| B | -0.91739000 | -1.88546500 | 1.76407800  |
| B | 0.52717500  | -1.24929900 | 0.88354600  |
| B | 0.47218900  | 0.33163200  | 1.80164100  |
| B | -1.04971000 | -3.58479900 | 1.62154300  |
| B | 1.90884700  | -2.16654900 | 1.69746200  |
| B | 1.97257000  | 1.17358700  | 1.62284900  |
| B | 3.33577700  | -1.38850200 | 1.71131700  |
| B | 4.75124400  | -0.60382600 | 1.60193100  |
| B | 1.88180400  | -0.49669200 | 1.76338100  |
| B | 4.83106400  | 1.08995200  | 1.36302800  |
| B | 3.49627400  | 1.98381000  | 1.45342900  |
| B | 3.22789200  | 0.21539400  | 0.86389200  |
| B | -0.93089700 | -1.88236500 | -1.76796400 |
| B | 0.51992600  | -1.24683000 | -0.88292800 |
| B | 0.46369300  | 0.33922600  | -1.79346000 |
| B | -1.06527300 | -3.58312800 | -1.63479300 |
| B | 1.96177300  | 1.16431300  | -1.59657400 |
| B | 3.33367200  | -1.38441800 | -1.71077700 |
| B | 4.79824300  | -0.64843600 | -1.64712000 |
| B | 1.87960200  | -0.50031500 | -1.74666500 |
| B | 4.81807100  | 1.00437900  | -1.29236700 |
| B | 3.48169200  | 1.93153200  | -1.33743300 |
| B | 3.20655200  | 0.20947200  | -0.81653200 |
| B | 2.13755100  | 2.87463400  | 1.43214400  |
| B | -0.68042100 | 2.91373800  | 1.70798100  |
| B | 0.57066600  | 1.95131600  | 0.86411700  |
| B | -2.22877000 | 2.10608100  | 1.69796500  |
| B | 0.80888500  | 3.79368100  | 1.41749200  |
| B | -2.22546500 | 0.56115200  | 0.87062300  |
| B | -2.31390000 | -1.04839100 | 1.66468300  |
| B | -3.77603900 | 1.43058400  | 1.37932700  |
| B | -3.79430600 | -1.87960100 | 1.36730200  |
| B | -0.83830500 | 1.22398600  | 1.84518700  |
| B | -3.94729700 | -3.55808400 | 1.24157600  |
| B | -3.76282800 | -0.24414900 | 1.37473300  |
| B | -2.49673900 | -4.35789900 | 1.38726800  |
| B | -2.26134100 | -2.59475000 | 0.81486400  |
| B | 2.11071500  | 2.84478200  | -1.33495700 |
| B | -0.69859500 | 2.91539400  | -1.72990900 |
| B | 0.56647300  | 1.94953600  | -0.84028600 |
| B | -2.24369800 | 2.10639100  | -1.66439900 |
| B | 0.78217000  | 3.78633100  | -1.36085800 |

|   |             |             |             |
|---|-------------|-------------|-------------|
| B | -2.23081000 | 0.55277100  | -0.91951900 |
| B | -2.33527900 | -1.05220400 | -1.68398800 |
| B | -3.79467800 | 1.40556100  | -1.44007300 |
| B | -3.82952200 | -1.86588100 | -1.43419000 |
| B | -0.83702800 | 1.24023800  | -1.87227600 |
| B | -3.97018000 | -3.52912200 | -1.26148100 |
| B | -3.79595800 | -0.23648800 | -1.48972200 |
| B | -2.51123500 | -4.35061200 | -1.38686700 |
| B | -2.28630000 | -2.59750200 | -0.84350600 |
| B | -4.77731200 | -0.95189000 | 0.00529000  |
| B | -5.01587900 | 0.64519800  | 0.31372900  |
| B | 2.13221100  | 4.33202300  | -0.27381200 |
| B | 3.34111800  | 3.20884200  | 0.00384000  |
| B | -5.06664200 | -2.58436100 | 0.12286300  |
| B | 4.84872600  | 2.48462600  | -0.27080900 |
| B | 1.89697700  | -2.16217300 | -1.68482400 |
| B | 0.41316000  | -2.85538700 | -1.76172500 |
| B | 0.43001300  | -2.85852300 | 1.74665600  |
| B | 6.03293000  | 1.38872300  | -0.01058800 |
| B | -5.07650400 | -4.12692000 | -0.00522700 |
| B | -1.07767800 | -5.20460700 | 1.12030800  |
| B | 0.40527000  | -4.50109000 | -0.92792900 |
| B | 1.83764900  | -3.85268200 | -1.43700800 |
| B | 3.26683900  | -3.04874500 | 0.95599200  |
| B | 4.73229700  | -2.39472900 | -1.36451300 |
| B | -4.66829800 | 2.23779600  | 0.00025700  |
| B | -3.62791800 | 3.07885400  | 1.38285900  |
| B | -2.00973200 | 3.56891800  | 0.84977300  |
| B | -0.63106500 | 4.59544900  | 1.34472400  |
| B | 0.64971300  | 5.00020700  | -0.00756400 |
| B | -3.67720800 | 3.04902300  | -1.39426600 |
| B | -2.02354400 | 3.56248100  | -0.83488300 |
| B | -0.67244800 | 4.58273000  | -1.31371900 |
| B | 0.41936900  | -4.49745500 | 0.90518600  |
| B | 1.85956000  | -3.85661700 | 1.43255400  |
| B | 3.24407200  | -3.05458000 | -0.94383300 |
| B | 4.75598500  | -2.34573000 | 1.38480400  |
| B | -1.09094200 | -5.20229300 | -1.14007300 |
| B | -0.73065500 | 5.92213600  | -0.05329700 |
| B | -2.06291800 | 5.47029000  | -0.94908100 |
| B | -3.49781800 | 4.67432700  | -0.99068700 |
| B | -4.57316800 | 3.86375600  | 0.02624900  |
| B | -2.01059300 | 5.48304500  | 0.96334600  |

|   |             |             |             |
|---|-------------|-------------|-------------|
| B | -3.45234800 | 4.70021600  | 0.97391600  |
| B | -3.78369800 | -4.99136600 | -0.01666200 |
| B | -2.27283200 | -5.58139200 | -0.00562700 |
| B | 6.17893500  | 0.12087500  | 1.14171200  |
| B | 6.05860900  | -1.58627100 | -0.87764700 |
| B | 6.06922200  | -1.50414600 | 0.87481000  |
| B | 6.20399000  | 0.02728000  | -1.00981000 |

(f)  $C_1 B_{94}$  (VI)

|   |             |             |             |
|---|-------------|-------------|-------------|
| B | -1.64008500 | -1.56765100 | -1.80777300 |
| B | -1.73596900 | 0.00218600  | -0.88856300 |
| B | -0.29449100 | 0.71602500  | -1.74472200 |
| B | -3.08203600 | -2.46892800 | -1.60217300 |
| B | -3.17747600 | 0.81719500  | -1.71565900 |
| B | -0.23701500 | 2.42282000  | -1.63797400 |
| B | -3.13402100 | 2.46498900  | -1.65574400 |
| B | -3.11582400 | 4.08994500  | -1.41935200 |
| B | -1.69195200 | 1.56682800  | -1.75896400 |
| B | -1.68904100 | 4.98154000  | -1.34561000 |
| B | -0.26472000 | 4.12107700  | -1.45917800 |
| B | -1.65005600 | 3.09222000  | -0.86319800 |
| B | -1.69195500 | -1.56682200 | 1.75895400  |
| B | -1.73596900 | -0.00218000 | 0.88856600  |
| B | -3.13403400 | -2.46497300 | 1.65573300  |
| B | -0.26333200 | 2.41265500  | 1.72248500  |
| B | -3.08203100 | 2.46893200  | 1.60217800  |
| B | -3.11429800 | 4.11851700  | 1.35905100  |
| B | -1.64008200 | 1.56765100  | 1.80776900  |
| B | -1.74333100 | 5.01991300  | 1.18667100  |
| B | -0.31580300 | 4.09230200  | 1.33167900  |
| B | -1.64365300 | 3.06584900  | 0.79953600  |
| B | 1.18654800  | 3.35434200  | -1.44034600 |
| B | 2.52969400  | 0.84141800  | -1.64454900 |
| B | 1.08766100  | 1.54997300  | -0.81759500 |
| B | 2.52179500  | -0.86211200 | -1.63822500 |
| B | 2.59757000  | 2.56061800  | -1.45438100 |
| B | 1.12677100  | -1.60528100 | -0.91148100 |
| B | -0.26333800 | -2.41265900 | -1.72249500 |
| B | 2.58613300  | -2.55168700 | -1.41143300 |
| B | -0.31580700 | -4.09230100 | -1.33166600 |
| B | -1.74334200 | -5.01991300 | -1.18666400 |
| B | 1.12566900  | -3.32319000 | -1.41960100 |
| B | -3.11430300 | -4.11851300 | -1.35905000 |
| B | -1.64365500 | -3.06584800 | -0.79953200 |
| B | 1.12567400  | 3.32319200  | 1.41959900  |
| B | 2.52179700  | 0.86211000  | 1.63822600  |
| B | 1.12677700  | 1.60527900  | 0.91147800  |
| B | 2.52969000  | -0.84142200 | 1.64454200  |
| B | 2.58613700  | 2.55168500  | 1.41142900  |
| B | 1.08765300  | -1.54997200 | 0.81759000  |
| B | -0.23701700 | -2.42282300 | 1.63798600  |

|   |             |             |             |
|---|-------------|-------------|-------------|
| B | 2.59756500  | -2.56061700 | 1.45438000  |
| B | -0.26472500 | -4.12108000 | 1.45918500  |
| B | -1.68904900 | -4.98153700 | 1.34563000  |
| B | 1.18654400  | -3.35434400 | 1.44034000  |
| B | -3.11582200 | -4.08993800 | 1.41936700  |
| B | -1.65005800 | -3.09221900 | 0.86320200  |
| B | 0.96029700  | -4.53627900 | -0.03527000 |
| B | 2.51325800  | -4.05704300 | -0.37735500 |
| B | 2.51326400  | 4.05704000  | 0.37734400  |
| B | 0.96030200  | 4.53627500  | 0.03526900  |
| B | -0.30770700 | -5.59163900 | -0.25776200 |
| B | -0.30770600 | 5.59163300  | 0.25772200  |
| B | -3.11610600 | 0.82191700  | 1.76187400  |
| B | -3.17747800 | -0.81718500 | 1.71564800  |
| B | -3.11610300 | -0.82191200 | -1.76186000 |
| B | -1.67770000 | 6.24555400  | -0.08779000 |
| B | -1.67769900 | -6.24554500 | 0.08780000  |
| B | -3.05817500 | -5.53362600 | 0.09809300  |
| B | -3.05817200 | 5.53362500  | -0.09807500 |
| B | -4.29053800 | -4.47831600 | 0.04438700  |
| B | -4.50597400 | -3.24262100 | -1.10012600 |
| B | -4.58145100 | -1.56694900 | 0.91606300  |
| B | -4.64794500 | 0.01917800  | 1.44378000  |
| B | -4.58145400 | 1.56694700  | -0.91606100 |
| B | -4.50597200 | 3.24262600  | 1.10013500  |
| B | -4.29053900 | 4.47831800  | -0.04438000 |
| B | 3.73707000  | -2.99254200 | -0.03979400 |
| B | 4.01084200  | -1.76284300 | -1.41434500 |
| B | 3.86610300  | -0.00929700 | -0.85251700 |
| B | 3.99797400  | 1.74816100  | -1.49319700 |
| B | 3.73707500  | 2.99253500  | 0.03978800  |
| B | 3.99797100  | -1.74816200 | 1.49319000  |
| B | 3.86610200  | 0.00929400  | 0.85251300  |
| B | 4.01084400  | 1.76283600  | 1.41434000  |
| B | -4.56382600 | -1.59192200 | -0.92012100 |
| B | -4.64794000 | -0.01917300 | -1.44378700 |
| B | -4.56382400 | 1.59192800  | 0.92012300  |
| B | -4.54996900 | 3.22992100  | -1.11196200 |
| B | -4.54997200 | -3.22993100 | 1.11197800  |
| B | 5.28110700  | -2.43334700 | -0.39863400 |
| B | 5.28111200  | 2.43334600  | 0.39863400  |
| B | 1.10132300  | 0.04327800  | 1.78306500  |
| B | 1.10132600  | -0.04327500 | -1.78306600 |

|   |             |             |             |
|---|-------------|-------------|-------------|
| B | 5.38506300  | -0.87211400 | -1.36317800 |
| B | 5.38404900  | 0.88289000  | -1.42429900 |
| B | 5.38404900  | -0.88289700 | 1.42428600  |
| B | 5.38506600  | 0.87211000  | 1.36316700  |
| B | 6.39153100  | 1.40563900  | -0.00923200 |
| B | 6.70204500  | -0.03234100 | 0.84038800  |
| B | 6.39153100  | -1.40564300 | 0.00922500  |
| B | 6.70204400  | 0.03233700  | -0.84039500 |
| B | -0.29448800 | -0.71603200 | 1.74474400  |



(g)  $C_{2v}$  B<sub>96</sub> (VII)

|   |             |             |             |
|---|-------------|-------------|-------------|
| B | -1.42685200 | 1.42713300  | -4.11996200 |
| B | -1.67408200 | 1.43479500  | -2.44574700 |
| B | -0.84999200 | 2.68207900  | -1.51909100 |
| B | -1.79220700 | 0.00000000  | -1.62935900 |
| B | -0.84679000 | 0.00000000  | -3.09412600 |
| B | -1.41784300 | 4.27752100  | -0.79354300 |
| B | -1.67408200 | -1.43479500 | -2.44574700 |
| B | -0.90400500 | 0.00000000  | -0.03847100 |
| B | -1.77707500 | 1.31290400  | 0.89560700  |
| B | -1.77707500 | -1.31290400 | 0.89560700  |
| B | -1.70930400 | 1.41699200  | 2.49169700  |
| B | -1.42692500 | 4.29178100  | 0.88291900  |
| B | -0.84112300 | 2.69904400  | 1.58655300  |
| B | -1.43420700 | 2.88438900  | -3.26605800 |
| B | -1.80939800 | -1.38221600 | -0.73744500 |
| B | -1.65622700 | 2.82702800  | 0.06585700  |
| B | -1.80939800 | 1.38221600  | -0.73744500 |
| B | 1.42685200  | 1.42713300  | -4.11996200 |
| B | 1.67408200  | 1.43479500  | -2.44574700 |
| B | 0.84999200  | 2.68207900  | -1.51909100 |
| B | 1.79220700  | 0.00000000  | -1.62935900 |
| B | 0.84679000  | 0.00000000  | -3.09412600 |
| B | 1.41784300  | 4.27752100  | -0.79354300 |
| B | 1.67408200  | -1.43479500 | -2.44574700 |
| B | 0.90400500  | 0.00000000  | -0.03847100 |
| B | 1.77707500  | 1.31290400  | 0.89560700  |
| B | 1.77707500  | -1.31290400 | 0.89560700  |
| B | 1.70930400  | 1.41699200  | 2.49169700  |
| B | 1.42692500  | 4.29178100  | 0.88291900  |
| B | 0.84112300  | 2.69904400  | 1.58655300  |
| B | 1.43420700  | 2.88438900  | -3.26605800 |
| B | 1.80939800  | -1.38221600 | -0.73744500 |
| B | 1.65622700  | 2.82702800  | 0.06585700  |
| B | 1.80939800  | 1.38221600  | -0.73744500 |
| B | 0.00000000  | 5.43666400  | -3.09213200 |
| B | 0.00000000  | 5.54942100  | -1.56123800 |
| B | 0.00000000  | 5.23091600  | 0.03360400  |
| B | 0.00000000  | 4.15299700  | -3.92585100 |
| B | 0.00000000  | 2.62183800  | -4.50762900 |
| B | 1.31041200  | 4.34227700  | -2.47267100 |
| B | -1.31041200 | 4.34227700  | -2.47267100 |
| B | -1.65622700 | -2.82702800 | 0.06585700  |

|   |             |             |             |
|---|-------------|-------------|-------------|
| B | -0.84999200 | -2.68207900 | -1.51909100 |
| B | -1.41784300 | -4.27752100 | -0.79354300 |
| B | -0.84112300 | -2.69904400 | 1.58655300  |
| B | -1.70930400 | -1.41699200 | 2.49169700  |
| B | -1.40447200 | -2.87773800 | 3.30871800  |
| B | -1.28086500 | -4.38812000 | 2.54333000  |
| B | -1.29757400 | -1.43119900 | 4.09527100  |
| B | -0.84608100 | 0.00000000  | 3.10342000  |
| B | -1.42692500 | -4.29178100 | 0.88291900  |
| B | 1.65622700  | -2.82702800 | 0.06585700  |
| B | 0.84999200  | -2.68207900 | -1.51909100 |
| B | 1.41784300  | -4.27752100 | -0.79354300 |
| B | 0.84112300  | -2.69904400 | 1.58655300  |
| B | 1.70930400  | -1.41699200 | 2.49169700  |
| B | 1.40447200  | -2.87773800 | 3.30871800  |
| B | 1.28086500  | -4.38812000 | 2.54333000  |
| B | 1.29757400  | -1.43119900 | 4.09527100  |
| B | 0.84608100  | 0.00000000  | 3.10342000  |
| B | 1.42692500  | -4.29178100 | 0.88291900  |
| B | 0.00000000  | -5.46804700 | 3.17761400  |
| B | 0.00000000  | -4.17034100 | 4.01022500  |
| B | 0.00000000  | -2.64521800 | 4.59986500  |
| B | 0.00000000  | -5.52495500 | 1.64366600  |
| B | 0.00000000  | -5.23091600 | 0.03360400  |
| B | 1.01752800  | 0.00000000  | 4.98872000  |
| B | 1.29757400  | 1.43119900  | 4.09527100  |
| B | 1.40447200  | 2.87773800  | 3.30871800  |
| B | 1.28086500  | 4.38812000  | 2.54333000  |
| B | -1.28086500 | 4.38812000  | 2.54333000  |
| B | -1.40447200 | 2.87773800  | 3.30871800  |
| B | -1.29757400 | 1.43119900  | 4.09527100  |
| B | -1.01752800 | 0.00000000  | 4.98872000  |
| B | 0.00000000  | -1.41562500 | 5.73076400  |
| B | 0.00000000  | 5.52495500  | 1.64366600  |
| B | 1.31308700  | 0.00000000  | -4.99147800 |
| B | 1.42685200  | -1.42713300 | -4.11996200 |
| B | 1.43420700  | -2.88438900 | -3.26605800 |
| B | 1.31041200  | -4.34227700 | -2.47267100 |
| B | -1.31041200 | -4.34227700 | -2.47267100 |
| B | -1.43420700 | -2.88438900 | -3.26605800 |
| B | -1.42685200 | -1.42713300 | -4.11996200 |
| B | -1.31308700 | 0.00000000  | -4.99147800 |
| B | 0.00000000  | 1.38366200  | -5.57342400 |

|   |            |             |             |
|---|------------|-------------|-------------|
| B | 0.00000000 | -5.54942100 | -1.56123800 |
| B | 0.00000000 | -2.62183800 | -4.50762900 |
| B | 0.00000000 | -1.38366200 | -5.57342400 |
| B | 0.00000000 | -4.15299700 | -3.92585100 |
| B | 0.00000000 | 0.00000000  | -6.23688800 |
| B | 0.00000000 | -5.43666400 | -3.09213200 |
| B | 0.00000000 | 2.64521800  | 4.59986500  |
| B | 0.00000000 | 4.17034100  | 4.01022500  |
| B | 0.00000000 | 1.41562500  | 5.73076400  |
| B | 0.00000000 | 0.00000000  | 6.42680700  |
| B | 0.00000000 | 5.46804700  | 3.17761400  |

(h)  $C_1 B_{98}$  (VIII)

|   |             |             |             |
|---|-------------|-------------|-------------|
| B | -0.70082500 | -4.33120800 | 1.46378700  |
| B | -0.93930400 | -2.65675400 | 1.63543100  |
| B | -2.37565000 | -1.92928100 | 0.98586100  |
| B | 0.36668600  | -1.56449300 | 1.85119900  |
| B | 0.55803600  | -3.08231300 | 0.84629200  |
| B | 1.89147400  | -2.22291200 | 1.66473900  |
| B | 0.07735700  | -0.03610300 | 0.93992400  |
| B | -1.32345800 | 0.64746300  | 1.85938700  |
| B | 0.04690800  | 1.56637600  | 1.77860800  |
| B | -1.51316100 | 2.29410400  | 1.63648500  |
| B | -4.14211800 | 0.35578000  | 1.72215800  |
| B | -2.71413100 | 1.22297400  | 0.84718000  |
| B | -2.24065200 | -3.77746800 | 1.51061000  |
| B | 1.62686400  | -0.51203600 | 1.78717600  |
| B | -2.72245700 | -0.35120200 | 1.87547000  |
| B | -1.20837200 | -1.02094100 | 1.82653600  |
| B | -0.76057200 | -4.25405700 | -1.46377500 |
| B | -0.97842900 | -2.58605100 | -1.58806400 |
| B | -2.38517900 | -1.82494300 | -0.72290400 |
| B | 0.35289500  | -1.53537300 | -1.75623100 |
| B | 0.54162400  | -3.07313500 | -0.85151400 |
| B | -4.09668100 | -1.34024700 | -1.64987700 |
| B | 1.87352700  | -2.20301300 | -1.66560400 |
| B | 0.07934500  | -0.00845600 | -0.85869300 |
| B | -1.30625500 | 0.68149200  | -1.77164100 |
| B | 0.04407900  | 1.59257600  | -1.75747000 |
| B | -1.51435600 | 2.32425500  | -1.63665100 |
| B | -4.20208600 | 0.37475400  | -1.63344400 |
| B | -2.74109400 | 1.24302000  | -0.85832500 |
| B | -2.30822400 | -3.57105900 | -1.37340000 |
| B | 1.61260200  | -0.49808400 | -1.76376900 |
| B | -2.70098400 | -0.32880700 | -1.72436400 |
| B | -1.20149400 | -0.96854600 | -1.69400900 |
| B | -4.77656900 | -3.43793000 | 0.06620500  |
| B | -3.48528000 | -4.33670100 | -0.25400300 |
| B | -1.92117400 | -4.84206200 | -0.09638300 |
| B | -3.83534800 | -2.94058400 | -1.36953800 |
| B | -3.73714500 | -3.25307200 | 1.50644400  |
| B | 2.96987900  | 0.36416400  | 1.70125300  |
| B | 3.01217300  | -1.19547200 | 0.82472700  |
| B | 4.50977100  | -0.29717700 | 1.40187200  |
| B | 2.60615400  | 1.86472500  | 0.84810100  |

|   |             |             |             |
|---|-------------|-------------|-------------|
| B | 1.26270300  | 2.61986500  | 1.71275600  |
| B | 2.54145700  | 3.60468900  | 1.29195200  |
| B | 4.11612600  | 2.99752300  | 1.00127100  |
| B | 1.05337500  | 4.28107900  | 1.41624800  |
| B | -0.21761000 | 3.10111100  | 0.83597200  |
| B | 4.26641500  | 1.31900700  | 1.27974500  |
| B | 2.95523000  | 0.38013900  | -1.70920800 |
| B | 3.01290400  | -1.19281200 | -0.85553500 |
| B | 4.48988000  | -0.30271500 | -1.41793400 |
| B | 2.61166700  | 1.88128200  | -0.84219300 |
| B | 1.26313800  | 2.64003000  | -1.69015500 |
| B | 2.54421200  | 3.62050900  | -1.30668300 |
| B | 4.11415100  | 3.01573200  | -1.03261400 |
| B | 1.04935200  | 4.30321700  | -1.39431000 |
| B | -0.22231300 | 3.12368100  | -0.83768900 |
| B | 4.25274700  | 1.33001700  | -1.31227400 |
| B | 5.26598000  | 3.86884900  | -0.00905200 |
| B | 3.86011800  | 4.58398300  | 0.00699000  |
| B | 2.21659500  | 4.88717100  | 0.00658000  |
| B | 5.56003500  | 2.31924000  | -0.05183700 |
| B | 5.39062400  | 0.65824800  | -0.02875500 |
| B | -0.46843300 | 5.06630700  | -1.24325200 |
| B | -1.74212300 | 3.98855300  | -1.41068200 |
| B | -3.06955300 | 3.03330600  | -1.46863100 |
| B | -4.36084900 | 2.06309700  | -1.40862800 |
| B | -4.36185000 | 1.96090800  | 1.34571800  |
| B | -3.04649400 | 2.97486200  | 1.36024700  |
| B | -1.70829400 | 3.96289800  | 1.39818400  |
| B | -0.44532200 | 5.05414900  | 1.27590700  |
| B | 0.82837300  | 5.76201200  | -0.01567700 |
| B | 0.74866900  | -4.91308400 | -1.44395700 |
| B | 2.07010800  | -3.89127000 | -1.48875300 |
| B | 3.40407700  | -2.91163200 | -1.45995200 |
| B | 4.78480300  | -1.97646500 | -1.29616800 |
| B | 4.82659000  | -1.94306000 | 1.25458800  |
| B | 3.43039200  | -2.85988300 | 1.37174600  |
| B | 2.10404900  | -3.89344200 | 1.36244200  |
| B | 0.78421900  | -4.99568100 | 1.25746200  |
| B | -0.47887300 | -5.65860900 | -0.31762100 |
| B | 5.83908300  | -0.91588200 | -0.08118600 |
| B | 3.30440900  | -4.16195100 | 0.02598600  |
| B | 2.27171100  | -5.39781900 | 0.42516100  |
| B | 4.76970700  | -3.42743300 | 0.13446900  |

|   |             |             |             |
|---|-------------|-------------|-------------|
| B | 0.97988600  | -6.10050900 | -0.11269300 |
| B | 5.95004600  | -2.45267400 | -0.03740400 |
| B | -3.01687900 | 4.21227100  | 0.03566200  |
| B | -4.46714700 | 3.43949000  | 0.35915800  |
| B | -1.89136200 | 5.41203600  | 0.15732100  |
| B | -0.62379300 | 6.29137200  | 0.01414000  |
| B | -5.51826700 | 2.26655200  | 0.00235400  |
| B | -5.54489100 | -0.49695300 | -0.90932000 |
| B | -5.39237600 | -1.98199200 | -0.32175000 |
| B | -5.68334100 | 1.09421400  | -1.18961500 |
| B | -5.59245900 | 0.83308500  | 0.97701600  |
| B | -5.43277400 | -0.73682800 | 0.97688800  |
| B | -4.97620200 | -2.29199000 | 1.31777600  |

(i)  $C_2 B_{128}$  (IX)

|   |             |             |             |
|---|-------------|-------------|-------------|
| B | 4.30429900  | -4.05656500 | -1.53613400 |
| B | 4.36096000  | -4.17351000 | 1.24219600  |
| B | -1.40253300 | -5.81987200 | 1.51239800  |
| B | -1.49370800 | -5.77837600 | -1.40628400 |
| B | 1.36320700  | -5.76492800 | -1.48525300 |
| B | -0.08303900 | -6.65591100 | -1.32455800 |
| B | 0.00710100  | -6.66009700 | 1.34886100  |
| B | 1.51080400  | -5.84792500 | 1.33133700  |
| B | 2.67878600  | -3.18798400 | -0.92634800 |
| B | -0.02949600 | -1.69174700 | -0.88885700 |
| B | 1.49161200  | -4.13490300 | 1.56451800  |
| B | 1.34680800  | -0.80516000 | 1.76854300  |
| B | 0.03378400  | -1.70516900 | 0.89296400  |
| B | 2.73589100  | -3.18046400 | 0.79727800  |
| B | 1.35969300  | -0.77684400 | -1.80953200 |
| B | 1.37897000  | -4.09727700 | -1.70866100 |
| B | -0.04656100 | -3.27615300 | -1.77865200 |
| B | 4.62481300  | -0.91754300 | -1.31457900 |
| B | 2.82203400  | -1.61543900 | -1.74221900 |
| B | -1.49348900 | -4.09942000 | -1.62443900 |
| B | 2.86498100  | -1.58002100 | 1.64662700  |
| B | -1.39309800 | -4.11986200 | 1.66772300  |
| B | 0.05181300  | -3.31669800 | 1.76946900  |
| B | 4.38432800  | -0.78218100 | 1.57581000  |
| B | 4.24664700  | -2.42114700 | -1.88207300 |
| B | 0.02320100  | -4.80035600 | 0.84805800  |
| B | 4.32737100  | -2.46743700 | 1.37246300  |
| B | -0.02928600 | -4.76539300 | -0.85260200 |
| B | 1.34735100  | -2.39797100 | -1.75607700 |
| B | 1.43887800  | -2.44403200 | 1.76042600  |
| B | 2.73589100  | 3.16754200  | -0.79613600 |
| B | 4.28521600  | 0.83223600  | 1.58197600  |
| B | 4.31413400  | 4.13675100  | 1.42598700  |
| B | 2.67068900  | 3.18923700  | 0.89553100  |
| B | 4.40919200  | 4.13844800  | -1.17266400 |
| B | 4.39170500  | 0.74851300  | -1.31577100 |
| B | 2.90617300  | 1.57029200  | -1.59281900 |
| B | 1.36170600  | 0.79767300  | -1.73146500 |
| B | 1.28200900  | 0.78901300  | 1.77876600  |
| B | 2.77799600  | 1.60499800  | 1.64145300  |
| B | 2.72547400  | 0.00413400  | 0.85616800  |
| B | 2.75588400  | -0.01817000 | -0.85924200 |

|   |             |             |             |
|---|-------------|-------------|-------------|
| B | 4.34399100  | 2.44285300  | -1.29530100 |
| B | 4.25260800  | 2.47951900  | 1.55608100  |
| B | -2.73589100 | -3.16754200 | -0.79613600 |
| B | -4.31413400 | -4.13675100 | 1.42598700  |
| B | -4.28521600 | -0.83223600 | 1.58197600  |
| B | -2.67068900 | -3.18923700 | 0.89553100  |
| B | -4.39170500 | -0.74851300 | -1.31577100 |
| B | -4.40919200 | -4.13844800 | -1.17266400 |
| B | -1.36170600 | -0.79767300 | -1.73146500 |
| B | -2.90617300 | -1.57029200 | -1.59281900 |
| B | -2.77799600 | -1.60499800 | 1.64145300  |
| B | -1.28200900 | -0.78901300 | 1.77876600  |
| B | -1.44787100 | -2.41575500 | -1.75373000 |
| B | -1.33735700 | -2.41974200 | 1.79329600  |
| B | -4.34399100 | -2.44285300 | -1.29530100 |
| B | -4.25260800 | -2.47951900 | 1.55608100  |
| B | 0.02949600  | 1.69174700  | -0.88885700 |
| B | -2.67878600 | 3.18798400  | -0.92634800 |
| B | -1.34680800 | 0.80516000  | 1.76854300  |
| B | -1.49161200 | 4.13490300  | 1.56451800  |
| B | -2.73589100 | 3.18046400  | 0.79727800  |
| B | -0.03378400 | 1.70516900  | 0.89296400  |
| B | -1.37897000 | 4.09727700  | -1.70866100 |
| B | -1.35969300 | 0.77684400  | -1.80953200 |
| B | -2.82203400 | 1.61543900  | -1.74221900 |
| B | 1.49348900  | 4.09942000  | -1.62443900 |
| B | 0.04656100  | 3.27615300  | -1.77865200 |
| B | -4.62481300 | 0.91754300  | -1.31457900 |
| B | -0.05181300 | 3.31669800  | 1.76946900  |
| B | -4.38432800 | 0.78218100  | 1.57581000  |
| B | -2.86498100 | 1.58002100  | 1.64662700  |
| B | 1.39309800  | 4.11986200  | 1.66772300  |
| B | 1.44787100  | 2.41575500  | -1.75373000 |
| B | -2.72547400 | -0.00413400 | 0.85616800  |
| B | 1.33735700  | 2.41974200  | 1.79329600  |
| B | -2.75588400 | 0.01817000  | -0.85924200 |
| B | -1.34735100 | 2.39797100  | -1.75607700 |
| B | -1.43887800 | 2.44403200  | 1.76042600  |
| B | 1.40253300  | 5.81987200  | 1.51239800  |
| B | 1.49370800  | 5.77837600  | -1.40628400 |
| B | 0.08303900  | 6.65591100  | -1.32455800 |
| B | -1.36320700 | 5.76492800  | -1.48525300 |
| B | -1.51080400 | 5.84792500  | 1.33133700  |



|   |             |             |             |
|---|-------------|-------------|-------------|
| B | -0.00710100 | 6.66009700  | 1.34886100  |
| B | -0.02320100 | 4.80035600  | 0.84805800  |
| B | 0.02928600  | 4.76539300  | -0.85260200 |
| B | -4.30429900 | 4.05656500  | -1.53613400 |
| B | -4.36096000 | 4.17351000  | 1.24219600  |
| B | -4.24664700 | 2.42114700  | -1.88207300 |
| B | -4.32737100 | 2.46743700  | 1.37246300  |
| B | -2.83689600 | 4.89296500  | -1.52613500 |
| B | -2.93065800 | 4.99716300  | 1.41070700  |
| B | 2.94534100  | 4.93477500  | -1.34551000 |
| B | 2.83926400  | 4.94020500  | 1.48307000  |
| B | 2.83689600  | -4.89296500 | -1.52613500 |
| B | 2.93065800  | -4.99716300 | 1.41070700  |
| B | -2.83926400 | -4.94020500 | 1.48307000  |
| B | -2.94534100 | -4.93477500 | -1.34551000 |
| B | -5.50181400 | -3.22185800 | 0.07108100  |
| B | -5.24590400 | -1.60226600 | 0.16650500  |
| B | -5.35791500 | 1.58390500  | 0.26977700  |
| B | -5.58034400 | 3.22649300  | 0.45926300  |
| B | -5.31802200 | 4.62396100  | -0.16903500 |
| B | -4.16505400 | 5.56842500  | -0.64651800 |
| B | -2.64399900 | 6.17102600  | -0.22912100 |
| B | -1.43414000 | 7.24612700  | -0.53781300 |
| B | -0.07744400 | 7.82976900  | 0.00576500  |
| B | 1.32957400  | 7.21481000  | 0.05184100  |
| B | 2.62687000  | 6.18974300  | 0.07765300  |
| B | 4.16970800  | 5.63377900  | 0.09419000  |
| B | 5.43826700  | 4.75755100  | 0.17220400  |
| B | 5.24590400  | 1.60226600  | 0.16650500  |
| B | 5.50181400  | 3.22185800  | 0.07108100  |
| B | 5.35791500  | -1.58390500 | 0.26977700  |
| B | 5.58034400  | -3.22649300 | 0.45926300  |
| B | 4.16505400  | -5.56842500 | -0.64651800 |
| B | -4.16970800 | -5.63377900 | 0.09419000  |
| B | -5.43826700 | -4.75755100 | 0.17220400  |
| B | -2.62687000 | -6.18974300 | 0.07765300  |
| B | -1.32957400 | -7.21481000 | 0.05184100  |
| B | 0.07744400  | -7.82976900 | 0.00576500  |
| B | 1.43414000  | -7.24612700 | -0.53781300 |
| B | 2.64399900  | -6.17102600 | -0.22912100 |
| B | 5.31802200  | -4.62396100 | -0.16903500 |
| B | -5.54280100 | 0.01030800  | 0.11754400  |
| B | 5.54280100  | -0.01030800 | 0.11754400  |

(j)  $D_{2h} B_{214} (\mathbf{X})$ 

|   |             |            |             |
|---|-------------|------------|-------------|
| B | -2.47515800 | 7.17544900 | 1.46737400  |
| B | 2.47515800  | 7.17544900 | -1.46737400 |
| B | 1.60377500  | 5.67781500 | -1.59516100 |
| B | -1.60377500 | 5.67781500 | -1.59516100 |
| B | -2.47515800 | 7.17544900 | -1.46737400 |
| B | -2.43536500 | 4.23442400 | -1.73285200 |
| B | 0.00000000  | 5.58304000 | -0.84733100 |
| B | -0.82937800 | 7.22697400 | -1.47086000 |
| B | -3.20615800 | 5.54286400 | -0.84195900 |
| B | -0.79684000 | 4.16792200 | -1.77246400 |
| B | 0.79684000  | 4.16792200 | -1.77246400 |
| B | 3.20615800  | 5.54286400 | -0.84195900 |
| B | 0.82937800  | 7.22697400 | -1.47086000 |
| B | 1.60377500  | 5.67781500 | 1.59516100  |
| B | -1.60377500 | 5.67781500 | 1.59516100  |
| B | 2.43536500  | 4.23442400 | 1.73285200  |
| B | 2.47515800  | 7.17544900 | 1.46737400  |
| B | 0.00000000  | 5.58304000 | 0.84733100  |
| B | -3.20615800 | 5.54286400 | 0.84195900  |
| B | -0.79684000 | 4.16792200 | 1.77246400  |
| B | -0.82937800 | 7.22697400 | 1.47086000  |
| B | 3.20615800  | 5.54286400 | 0.84195900  |
| B | 0.82937800  | 7.22697400 | 1.47086000  |
| B | 0.79684000  | 4.16792200 | 1.77246400  |
| B | -3.32650200 | 2.84717000 | -1.69196000 |
| B | -6.74367400 | 2.94924900 | -1.47315500 |
| B | -4.87001800 | 2.79344500 | -0.85191900 |
| B | -5.89596500 | 4.34990900 | -1.48479100 |
| B | -5.80019000 | 1.45134300 | -1.63945000 |
| B | -4.13955800 | 1.43081400 | -1.84222600 |
| B | -1.70670700 | 2.81854300 | -0.87983600 |
| B | -4.14698600 | 4.28972800 | -1.62803000 |
| B | -3.32650200 | 2.84717000 | 1.69196000  |
| B | -6.74367400 | 2.94924900 | 1.47315500  |
| B | -2.42308600 | 1.43533000 | 1.80107400  |
| B | -2.43536500 | 4.23442400 | 1.73285200  |
| B | -4.87001800 | 2.79344500 | 0.85191900  |
| B | -5.80019000 | 1.45134300 | 1.63945000  |
| B | -5.89596500 | 4.34990900 | 1.48479100  |
| B | -1.70670700 | 2.81854300 | 0.87983600  |
| B | -4.14698600 | 4.28972800 | 1.62803000  |
| B | -4.13955800 | 1.43081400 | 1.84222600  |

|   |             |             |             |
|---|-------------|-------------|-------------|
| B | 6.74367400  | 2.94924900  | -1.47315500 |
| B | 3.32650200  | 2.84717000  | -1.69196000 |
| B | 2.43536500  | 4.23442400  | -1.73285200 |
| B | 2.42308600  | 1.43533000  | -1.80107400 |
| B | 4.87001800  | 2.79344500  | -0.85191900 |
| B | 4.14698600  | 4.28972800  | -1.62803000 |
| B | 1.70670700  | 2.81854300  | -0.87983600 |
| B | 4.13955800  | 1.43081400  | -1.84222600 |
| B | 5.80019000  | 1.45134300  | -1.63945000 |
| B | 5.89596500  | 4.34990900  | -1.48479100 |
| B | 6.74367400  | 2.94924900  | 1.47315500  |
| B | 3.32650200  | 2.84717000  | 1.69196000  |
| B | 4.87001800  | 2.79344500  | 0.85191900  |
| B | 1.70670700  | 2.81854300  | 0.87983600  |
| B | 4.13955800  | 1.43081400  | 1.84222600  |
| B | 4.14698600  | 4.28972800  | 1.62803000  |
| B | 5.89596500  | 4.34990900  | 1.48479100  |
| B | 5.80019000  | 1.45134300  | 1.63945000  |
| B | 1.59703500  | 0.00000000  | -1.64267600 |
| B | -1.59703500 | 0.00000000  | -1.64267600 |
| B | -2.42308600 | 1.43533000  | -1.80107400 |
| B | -2.42308600 | -1.43533000 | -1.80107400 |
| B | 0.00000000  | 0.00000000  | -0.84155900 |
| B | -0.80201300 | 1.51698000  | -1.73880500 |
| B | -3.27201100 | 0.00000000  | -0.86656800 |
| B | -0.80201300 | -1.51698000 | -1.73880500 |
| B | 0.80201300  | -1.51698000 | -1.73880500 |
| B | 3.27201100  | 0.00000000  | -0.86656800 |
| B | 0.80201300  | 1.51698000  | -1.73880500 |
| B | 1.59703500  | 0.00000000  | 1.64267600  |
| B | -1.59703500 | 0.00000000  | 1.64267600  |
| B | 2.42308600  | -1.43533000 | 1.80107400  |
| B | 2.42308600  | 1.43533000  | 1.80107400  |
| B | 0.00000000  | 0.00000000  | 0.84155900  |
| B | -3.27201100 | 0.00000000  | 0.86656800  |
| B | -0.80201300 | -1.51698000 | 1.73880500  |
| B | -0.80201300 | 1.51698000  | 1.73880500  |
| B | 3.27201100  | 0.00000000  | 0.86656800  |
| B | 0.80201300  | 1.51698000  | 1.73880500  |
| B | 0.80201300  | -1.51698000 | 1.73880500  |
| B | -3.32650200 | -2.84717000 | -1.69196000 |
| B | -6.74367400 | -2.94924900 | -1.47315500 |
| B | -4.87001800 | -2.79344500 | -0.85191900 |

|   |             |             |             |
|---|-------------|-------------|-------------|
| B | -5.80019000 | -1.45134300 | -1.63945000 |
| B | -5.89596500 | -4.34990900 | -1.48479100 |
| B | -4.14698600 | -4.28972800 | -1.62803000 |
| B | -1.70670700 | -2.81854300 | -0.87983600 |
| B | -4.13955800 | -1.43081400 | -1.84222600 |
| B | -3.32650200 | -2.84717000 | 1.69196000  |
| B | -6.74367400 | -2.94924900 | 1.47315500  |
| B | -2.43536500 | -4.23442400 | 1.73285200  |
| B | -2.42308600 | -1.43533000 | 1.80107400  |
| B | -4.87001800 | -2.79344500 | 0.85191900  |
| B | -5.89596500 | -4.34990900 | 1.48479100  |
| B | -5.80019000 | -1.45134300 | 1.63945000  |
| B | -1.70670700 | -2.81854300 | 0.87983600  |
| B | -4.13955800 | -1.43081400 | 1.84222600  |
| B | -4.14698600 | -4.28972800 | 1.62803000  |
| B | 6.74367400  | -2.94924900 | -1.47315500 |
| B | 3.32650200  | -2.84717000 | -1.69196000 |
| B | 2.42308600  | -1.43533000 | -1.80107400 |
| B | 2.43536500  | -4.23442400 | -1.73285200 |
| B | 4.87001800  | -2.79344500 | -0.85191900 |
| B | 4.13955800  | -1.43081400 | -1.84222600 |
| B | 1.70670700  | -2.81854300 | -0.87983600 |
| B | 4.14698600  | -4.28972800 | -1.62803000 |
| B | 5.89596500  | -4.34990900 | -1.48479100 |
| B | 5.80019000  | -1.45134300 | -1.63945000 |
| B | 6.74367400  | -2.94924900 | 1.47315500  |
| B | 3.32650200  | -2.84717000 | 1.69196000  |
| B | 4.87001800  | -2.79344500 | 0.85191900  |
| B | 1.70670700  | -2.81854300 | 0.87983600  |
| B | 4.14698600  | -4.28972800 | 1.62803000  |
| B | 4.13955800  | -1.43081400 | 1.84222600  |
| B | 5.80019000  | -1.45134300 | 1.63945000  |
| B | 5.89596500  | -4.34990900 | 1.48479100  |
| B | 1.60377500  | -5.67781500 | -1.59516100 |
| B | -1.60377500 | -5.67781500 | -1.59516100 |
| B | -2.43536500 | -4.23442400 | -1.73285200 |
| B | -2.47515800 | -7.17544900 | -1.46737400 |
| B | 0.00000000  | -5.58304000 | -0.84733100 |
| B | -0.79684000 | -4.16792200 | -1.77246400 |
| B | -3.20615800 | -5.54286400 | -0.84195900 |
| B | -0.82937800 | -7.22697400 | -1.47086000 |
| B | 0.82937800  | -7.22697400 | -1.47086000 |
| B | 3.20615800  | -5.54286400 | -0.84195900 |

|   |             |             |             |
|---|-------------|-------------|-------------|
| B | 0.79684000  | -4.16792200 | -1.77246400 |
| B | 1.60377500  | -5.67781500 | 1.59516100  |
| B | -1.60377500 | -5.67781500 | 1.59516100  |
| B | 2.47515800  | -7.17544900 | 1.46737400  |
| B | 2.43536500  | -4.23442400 | 1.73285200  |
| B | 0.00000000  | -5.58304000 | 0.84733100  |
| B | -3.20615800 | -5.54286400 | 0.84195900  |
| B | -0.82937800 | -7.22697400 | 1.47086000  |
| B | -0.79684000 | -4.16792200 | 1.77246400  |
| B | 3.20615800  | -5.54286400 | 0.84195900  |
| B | 0.79684000  | -4.16792200 | 1.77246400  |
| B | 0.82937800  | -7.22697400 | 1.47086000  |
| B | -4.15722300 | -7.23093600 | -1.32562000 |
| B | -2.47515800 | -7.17544900 | 1.46737400  |
| B | -4.15722300 | -7.23093600 | 1.32562000  |
| B | 2.47515800  | -7.17544900 | -1.46737400 |
| B | 4.15722300  | -7.23093600 | -1.32562000 |
| B | 4.15722300  | -7.23093600 | 1.32562000  |
| B | 4.97556200  | -5.75960600 | 1.47930000  |
| B | 4.97556200  | -5.75960600 | -1.47930000 |
| B | -4.97556200 | -5.75960600 | 1.47930000  |
| B | -4.97556200 | -5.75960600 | -1.47930000 |
| B | -4.92040800 | 0.00000000  | 1.67076600  |
| B | -4.92040800 | 0.00000000  | -1.67076600 |
| B | 4.92040800  | 0.00000000  | 1.67076600  |
| B | 4.92040800  | 0.00000000  | -1.67076600 |
| B | 4.97556200  | 5.75960600  | 1.47930000  |
| B | 4.97556200  | 5.75960600  | -1.47930000 |
| B | 4.15722300  | 7.23093600  | -1.32562000 |
| B | 4.15722300  | 7.23093600  | 1.32562000  |
| B | -4.15722300 | 7.23093600  | 1.32562000  |
| B | -4.15722300 | 7.23093600  | -1.32562000 |
| B | -4.97556200 | 5.75960600  | 1.47930000  |
| B | -4.97556200 | 5.75960600  | -1.47930000 |
| B | 5.70596100  | -7.03842900 | 0.00000000  |
| B | 6.26635300  | -5.50117600 | 0.00000000  |
| B | 7.26227000  | -4.18660600 | 0.00000000  |
| B | 7.26227000  | 4.18660600  | 0.00000000  |
| B | 6.26635300  | 5.50117600  | 0.00000000  |
| B | 5.70596100  | 7.03842900  | 0.00000000  |
| B | -5.70596100 | 7.03842900  | 0.00000000  |
| B | -6.26635300 | 5.50117600  | 0.00000000  |
| B | -7.26227000 | 4.18660600  | 0.00000000  |

|   |             |             |             |
|---|-------------|-------------|-------------|
| B | -7.26227000 | -4.18660600 | 0.00000000  |
| B | -6.26635300 | -5.50117600 | 0.00000000  |
| B | -5.70596100 | -7.03842900 | 0.00000000  |
| B | -3.24716800 | -8.39684900 | 0.00000000  |
| B | -1.60468800 | -8.15197300 | 0.00000000  |
| B | 0.00000000  | -8.50308100 | 0.00000000  |
| B | 1.60468800  | -8.15197300 | 0.00000000  |
| B | 3.24716800  | -8.39684900 | 0.00000000  |
| B | 4.79089900  | -8.29957400 | 0.00000000  |
| B | -4.79089900 | 8.29957400  | 0.00000000  |
| B | -3.24716800 | 8.39684900  | 0.00000000  |
| B | -1.60468800 | 8.15197300  | 0.00000000  |
| B | 0.00000000  | 8.50308100  | 0.00000000  |
| B | 1.60468800  | 8.15197300  | 0.00000000  |
| B | 3.24716800  | 8.39684900  | 0.00000000  |
| B | -4.79089900 | -8.29957400 | 0.00000000  |
| B | 4.79089900  | 8.29957400  | 0.00000000  |
| B | -7.49633700 | 1.42368700  | 1.47687100  |
| B | -7.49633700 | 1.42368700  | -1.47687100 |
| B | -6.43086500 | 0.00000000  | -0.85598000 |
| B | -6.43086500 | 0.00000000  | 0.85598000  |
| B | -7.49633700 | -1.42368700 | 1.47687100  |
| B | -7.49633700 | -1.42368700 | -1.47687100 |
| B | -8.42089100 | 0.00000000  | 1.34089100  |
| B | -8.42089100 | 0.00000000  | -1.34089100 |
| B | 6.43086500  | 0.00000000  | 0.85598000  |
| B | 6.43086500  | 0.00000000  | -0.85598000 |
| B | 7.49633700  | 1.42368700  | 1.47687100  |
| B | 7.49633700  | 1.42368700  | -1.47687100 |
| B | 7.49633700  | -1.42368700 | 1.47687100  |
| B | 7.49633700  | -1.42368700 | -1.47687100 |
| B | 8.42089100  | 0.00000000  | 1.34089100  |
| B | 8.42089100  | 0.00000000  | -1.34089100 |
| B | 7.91275200  | 2.70911400  | 0.00000000  |
| B | 8.85593700  | 1.37212300  | 0.00000000  |
| B | 9.60366600  | 0.00000000  | 0.00000000  |
| B | 8.85593700  | -1.37212300 | 0.00000000  |
| B | 7.91275200  | -2.70911400 | 0.00000000  |
| B | -7.91275200 | 2.70911400  | 0.00000000  |
| B | -8.85593700 | 1.37212300  | 0.00000000  |
| B | -9.60366600 | 0.00000000  | 0.00000000  |
| B | -8.85593700 | -1.37212300 | 0.00000000  |
| B | -7.91275200 | -2.70911400 | 0.00000000  |

(k)  $C_{2v}$   $B_{260}$  (XI)

|   |             |            |             |
|---|-------------|------------|-------------|
| B | 1.33244500  | 7.23551300 | -5.80771300 |
| B | -1.47743400 | 7.16710000 | -4.12135100 |
| B | -1.33244500 | 7.23551300 | -5.80771300 |
| B | 1.47487700  | 7.28049100 | 0.82117200  |
| B | 1.46280000  | 7.28810900 | 2.45631500  |
| B | -1.46280000 | 7.28810900 | 2.45631500  |
| B | 1.58184100  | 5.70388300 | -0.03296400 |
| B | 1.58643600  | 5.67521700 | -3.25017200 |
| B | 1.47743400  | 7.16710000 | -4.12135100 |
| B | 1.72469500  | 4.23441100 | -4.07635000 |
| B | 0.85127600  | 5.60459200 | -1.63323600 |
| B | 1.50701000  | 7.24587600 | -2.47620700 |
| B | 0.84499900  | 5.53900300 | -4.86103900 |
| B | 1.75684700  | 4.16504100 | -2.43944700 |
| B | 1.72844800  | 4.18964800 | -0.83872400 |
| B | 0.85367500  | 5.58564900 | 1.62933300  |
| B | 1.51321500  | 7.25372800 | -0.83102400 |
| B | -1.58184100 | 5.70388300 | -0.03296400 |
| B | -1.58643600 | 5.67521700 | -3.25017200 |
| B | -1.73702800 | 4.23989500 | 0.79608300  |
| B | -1.47487700 | 7.28049100 | 0.82117200  |
| B | -0.85127600 | 5.60459200 | -1.63323600 |
| B | -0.84499900 | 5.53900300 | -4.86103900 |
| B | -1.75684700 | 4.16504100 | -2.43944700 |
| B | -1.50701000 | 7.24587600 | -2.47620700 |
| B | -0.85367500 | 5.58564900 | 1.62933300  |
| B | -1.51321500 | 7.25372800 | -0.83102400 |
| B | -1.72844800 | 4.18964800 | -0.83872400 |
| B | 1.71484000  | 2.84636700 | -4.97080700 |
| B | 1.48200100  | 2.95624200 | -8.40775300 |
| B | 0.85479800  | 2.79415900 | -6.51451100 |
| B | 1.49416800  | 4.33906600 | -7.54224000 |
| B | 1.64103600  | 1.44232000 | -7.43712000 |
| B | 1.86235000  | 1.43698100 | -5.80041300 |
| B | 0.88012400  | 2.81167300 | -3.36064400 |
| B | -1.71484000 | 2.84636700 | -4.97080700 |
| B | -1.48200100 | 2.95624200 | -8.40775300 |
| B | -1.78869400 | 1.43288600 | -4.07312600 |
| B | -1.72469500 | 4.23441100 | -4.07635000 |
| B | -0.85479800 | 2.79415900 | -6.51451100 |
| B | -1.64103600 | 1.44232000 | -7.43712000 |
| B | -1.49416800 | 4.33906600 | -7.54224000 |

|   |             |             |             |
|---|-------------|-------------|-------------|
| B | -0.88012400 | 2.81167300  | -3.36064400 |
| B | -1.64360400 | 4.29279300  | -5.79877800 |
| B | -1.86235000 | 1.43698100  | -5.80041300 |
| B | 1.58387100  | 4.26786100  | 5.78456800  |
| B | 1.46177000  | 4.35668800  | 7.53950200  |
| B | -1.46177000 | 4.35668800  | 7.53950200  |
| B | 1.73668600  | 2.82163100  | 4.91152400  |
| B | 1.71679900  | 2.80558900  | 1.69788000  |
| B | 1.73702800  | 4.23989500  | 0.79608300  |
| B | 1.73164600  | 1.40729600  | 0.79710000  |
| B | 0.84762000  | 2.83169200  | 3.27935000  |
| B | 1.77277900  | 4.27627200  | 2.47160600  |
| B | 0.88006200  | 2.83016600  | 0.07625100  |
| B | 1.74239400  | 1.31346400  | 2.49272900  |
| B | 1.78129100  | 1.31507200  | 4.08170400  |
| B | 0.85050700  | 2.78451000  | 6.49513100  |
| B | 1.70762000  | 4.26515300  | 4.10876100  |
| B | -1.73668600 | 2.82163100  | 4.91152400  |
| B | -1.71679900 | 2.80558900  | 1.69788000  |
| B | -1.75159200 | 1.39453700  | 5.74508300  |
| B | -1.58387100 | 4.26786100  | 5.78456800  |
| B | -0.84762000 | 2.83169200  | 3.27935000  |
| B | -0.88006200 | 2.83016600  | 0.07625100  |
| B | -1.74239400 | 1.31346400  | 2.49272900  |
| B | -1.77277900 | 4.27627200  | 2.47160600  |
| B | -0.85050700 | 2.78451000  | 6.49513100  |
| B | -1.70762000 | 4.26515300  | 4.10876100  |
| B | -1.78129100 | 1.31507200  | 4.08170400  |
| B | 1.61574400  | 0.00000000  | -0.08025600 |
| B | 1.67395000  | 0.00000000  | -3.23931400 |
| B | 1.78869400  | 1.43288600  | -4.07312600 |
| B | 1.78869400  | -1.43288600 | -4.07312600 |
| B | 0.84236500  | 0.00000000  | -1.65674200 |
| B | 1.76717100  | 1.53596700  | -2.44565400 |
| B | 0.86459800  | 0.00000000  | -4.88711400 |
| B | 1.76717100  | -1.53596700 | -2.44565400 |
| B | 1.72560500  | -1.51644100 | -0.84950700 |
| B | 0.88075100  | 0.00000000  | 1.59103600  |
| B | 1.72560500  | 1.51644100  | -0.84950700 |
| B | -1.61574400 | 0.00000000  | -0.08025600 |
| B | -1.67395000 | 0.00000000  | -3.23931400 |
| B | -1.73164600 | -1.40729600 | 0.79710000  |
| B | -1.73164600 | 1.40729600  | 0.79710000  |



|   |             |             |             |
|---|-------------|-------------|-------------|
| B | -0.84236500 | 0.00000000  | -1.65674200 |
| B | -0.86459800 | 0.00000000  | -4.88711400 |
| B | -1.76717100 | -1.53596700 | -2.44565400 |
| B | -1.76717100 | 1.53596700  | -2.44565400 |
| B | -0.88075100 | 0.00000000  | 1.59103600  |
| B | -1.72560500 | 1.51644100  | -0.84950700 |
| B | -1.72560500 | -1.51644100 | -0.84950700 |
| B | 1.71484000  | -2.84636700 | -4.97080700 |
| B | 1.48200100  | -2.95624200 | -8.40775300 |
| B | 0.85479800  | -2.79415900 | -6.51451100 |
| B | 1.64103600  | -1.44232000 | -7.43712000 |
| B | 1.49416800  | -4.33906600 | -7.54224000 |
| B | 1.64360400  | -4.29279300 | -5.79877800 |
| B | 0.88012400  | -2.81167300 | -3.36064400 |
| B | 1.86235000  | -1.43698100 | -5.80041300 |
| B | -1.71484000 | -2.84636700 | -4.97080700 |
| B | -1.48200100 | -2.95624200 | -8.40775300 |
| B | -1.72469500 | -4.23441100 | -4.07635000 |
| B | -1.78869400 | -1.43288600 | -4.07312600 |
| B | -0.85479800 | -2.79415900 | -6.51451100 |
| B | -1.49416800 | -4.33906600 | -7.54224000 |
| B | -1.64103600 | -1.44232000 | -7.43712000 |
| B | -0.88012400 | -2.81167300 | -3.36064400 |
| B | -1.86235000 | -1.43698100 | -5.80041300 |
| B | 1.62814100  | 0.00000000  | 6.60796500  |
| B | 1.75159200  | 1.39453700  | 5.74508300  |
| B | 1.75159200  | -1.39453700 | 5.74508300  |
| B | 0.84526700  | 0.00000000  | 8.11949400  |
| B | 1.61927400  | 1.44884300  | 7.44949100  |
| B | 0.87377000  | 0.00000000  | 4.97260600  |
| B | 1.61927400  | -1.44884300 | 7.44949100  |
| B | 1.50102000  | -1.44270000 | 9.15004500  |
| B | 1.50102000  | 1.44270000  | 9.15004500  |
| B | -1.62814100 | 0.00000000  | 6.60796500  |
| B | -0.84526700 | 0.00000000  | 8.11949400  |
| B | -0.87377000 | 0.00000000  | 4.97260600  |
| B | -1.61927400 | -1.44884300 | 7.44949100  |
| B | -1.61927400 | 1.44884300  | 7.44949100  |
| B | -1.50102000 | 1.44270000  | 9.15004500  |
| B | -1.50102000 | -1.44270000 | 9.15004500  |
| B | 1.73668600  | -2.82163100 | 4.91152400  |
| B | 1.71679900  | -2.80558900 | 1.69788000  |
| B | 1.73164600  | -1.40729600 | 0.79710000  |

|   |             |             |             |
|---|-------------|-------------|-------------|
| B | 1.73702800  | -4.23989500 | 0.79608300  |
| B | 0.84762000  | -2.83169200 | 3.27935000  |
| B | 1.74239400  | -1.31346400 | 2.49272900  |
| B | 0.88006200  | -2.83016600 | 0.07625100  |
| B | 1.77277900  | -4.27627200 | 2.47160600  |
| B | 1.70762000  | -4.26515300 | 4.10876100  |
| B | 0.85050700  | -2.78451000 | 6.49513100  |
| B | 1.78129100  | -1.31507200 | 4.08170400  |
| B | -1.73668600 | -2.82163100 | 4.91152400  |
| B | -1.71679900 | -2.80558900 | 1.69788000  |
| B | -1.58387100 | -4.26786100 | 5.78456800  |
| B | -1.75159200 | -1.39453700 | 5.74508300  |
| B | -0.84762000 | -2.83169200 | 3.27935000  |
| B | -0.88006200 | -2.83016600 | 0.07625100  |
| B | -1.77277900 | -4.27627200 | 2.47160600  |
| B | -1.74239400 | -1.31346400 | 2.49272900  |
| B | -0.85050700 | -2.78451000 | 6.49513100  |
| B | -1.78129100 | -1.31507200 | 4.08170400  |
| B | -1.70762000 | -4.26515300 | 4.10876100  |
| B | 1.58184100  | -5.70388300 | -0.03296400 |
| B | 1.58643600  | -5.67521700 | -3.25017200 |
| B | 1.72469500  | -4.23441100 | -4.07635000 |
| B | 1.47743400  | -7.16710000 | -4.12135100 |
| B | 0.85127600  | -5.60459200 | -1.63323600 |
| B | 1.75684700  | -4.16504100 | -2.43944700 |
| B | 0.84499900  | -5.53900300 | -4.86103900 |
| B | 1.50701000  | -7.24587600 | -2.47620700 |
| B | 1.51321500  | -7.25372800 | -0.83102400 |
| B | 0.85367500  | -5.58564900 | 1.62933300  |
| B | 1.72844800  | -4.18964800 | -0.83872400 |
| B | -1.58184100 | -5.70388300 | -0.03296400 |
| B | -1.58643600 | -5.67521700 | -3.25017200 |
| B | -1.47487700 | -7.28049100 | 0.82117200  |
| B | -1.73702800 | -4.23989500 | 0.79608300  |
| B | -0.85127600 | -5.60459200 | -1.63323600 |
| B | -0.84499900 | -5.53900300 | -4.86103900 |
| B | -1.50701000 | -7.24587600 | -2.47620700 |
| B | -1.75684700 | -4.16504100 | -2.43944700 |
| B | -0.85367500 | -5.58564900 | 1.62933300  |
| B | -1.72844800 | -4.18964800 | -0.83872400 |
| B | -1.51321500 | -7.25372800 | -0.83102400 |
| B | 1.33244500  | -7.23551300 | -5.80771300 |
| B | -1.47743400 | -7.16710000 | -4.12135100 |

|   |             |             |             |
|---|-------------|-------------|-------------|
| B | -1.33244500 | -7.23551300 | -5.80771300 |
| B | 1.58387100  | -4.26786100 | 5.78456800  |
| B | 1.46177000  | -4.35668800 | 7.53950200  |
| B | -1.46177000 | -4.35668800 | 7.53950200  |
| B | 1.47487700  | -7.28049100 | 0.82117200  |
| B | 1.46280000  | -7.28810900 | 2.45631500  |
| B | -1.46280000 | -7.28810900 | 2.45631500  |
| B | 1.45168300  | -2.92696000 | 8.36424400  |
| B | -1.45168300 | -2.92696000 | 8.36424400  |
| B | -1.45168300 | 2.92696000  | 8.36424400  |
| B | 1.45168300  | 2.92696000  | 8.36424400  |
| B | -1.56268700 | 5.74063300  | 3.27917700  |
| B | 1.56268700  | 5.74063300  | 3.27917700  |
| B | 1.56268700  | -5.74063300 | 3.27917700  |
| B | -1.56268700 | -5.74063300 | 3.27917700  |
| B | -1.47068400 | -5.76247200 | -6.62099700 |
| B | 1.47068400  | -5.76247200 | -6.62099700 |
| B | -1.62289000 | 0.00000000  | -6.54980400 |
| B | 1.62289000  | 0.00000000  | -6.54980400 |
| B | 1.47068400  | 5.76247200  | -6.62099700 |
| B | -1.47068400 | 5.76247200  | -6.62099700 |
| B | 1.50840800  | -7.21061100 | 4.13762500  |
| B | -0.84808800 | -5.57287600 | 4.85997000  |
| B | 0.00000000  | -4.19573800 | 8.90768700  |
| B | 0.00000000  | -2.69886900 | 9.56892200  |
| B | 0.00000000  | 2.69886900  | 9.56892200  |
| B | 0.00000000  | 4.19573800  | 8.90768700  |
| B | 0.00000000  | 7.00511200  | -7.28646400 |
| B | 0.00000000  | 5.48234700  | -7.90250300 |
| B | 0.00000000  | 4.18827500  | -8.90958500 |
| B | 0.00000000  | 2.69359300  | -9.53641000 |
| B | -1.51198400 | 1.42549300  | -9.13283100 |
| B | 0.85426100  | 0.00000000  | -8.08096700 |
| B | 0.00000000  | -2.69359300 | -9.53641000 |
| B | 0.00000000  | -4.18827500 | -8.90958500 |
| B | 0.00000000  | -5.48234700 | -7.90250300 |
| B | 0.00000000  | -7.00511200 | -7.28646400 |
| B | 0.00000000  | -8.34344700 | 1.62622800  |
| B | 0.00000000  | -8.19915000 | -0.02229000 |
| B | 0.00000000  | -8.43547400 | -1.63314600 |
| B | 0.00000000  | -8.14266100 | -3.25245400 |
| B | 0.00000000  | -8.42257600 | -4.87640200 |
| B | 0.00000000  | -8.30330100 | -6.42470300 |

|   |             |             |              |
|---|-------------|-------------|--------------|
| B | 0.00000000  | -8.21465500 | 3.24732900   |
| B | 0.00000000  | -5.50284400 | 7.92491600   |
| B | 0.00000000  | 5.50284400  | 7.92491600   |
| B | -1.48588300 | 5.75768000  | 6.62728100   |
| B | 0.00000000  | 8.21465500  | 3.24732900   |
| B | 0.00000000  | 8.34344700  | 1.62622800   |
| B | 0.00000000  | 8.19915000  | -0.02229000  |
| B | 0.00000000  | 8.43547400  | -1.63314600  |
| B | 0.00000000  | 8.14266100  | -3.25245400  |
| B | 0.00000000  | 8.42257600  | -4.87640200  |
| B | 0.00000000  | 8.30330100  | -6.42470300  |
| B | -1.48588300 | -5.75768000 | 6.62728100   |
| B | 1.48588300  | -5.75768000 | 6.62728100   |
| B | 0.84808800  | -5.57287600 | 4.85997000   |
| B | -1.50840800 | -7.21061100 | 4.13762500   |
| B | 1.34539400  | -7.25090800 | 5.81978900   |
| B | -1.34539400 | -7.25090800 | 5.81978900   |
| B | 1.51198400  | -1.42549300 | -9.13283100  |
| B | -1.51198400 | -1.42549300 | -9.13283100  |
| B | -0.85426100 | 0.00000000  | -8.08096700  |
| B | 1.51198400  | 1.42549300  | -9.13283100  |
| B | -1.35388300 | 0.00000000  | -10.05048800 |
| B | 1.35388300  | 0.00000000  | -10.05048800 |
| B | 1.48588300  | 5.75768000  | 6.62728100   |
| B | -0.84808800 | 5.57287600  | 4.85997000   |
| B | 0.84808800  | 5.57287600  | 4.85997000   |
| B | 1.50840800  | 7.21061100  | 4.13762500   |
| B | -1.50840800 | 7.21061100  | 4.13762500   |
| B | 1.34539400  | 7.25090800  | 5.81978900   |
| B | -1.34539400 | 7.25090800  | 5.81978900   |
| B | 0.00000000  | -8.37388300 | 4.87690100   |
| B | 0.00000000  | -8.29927600 | 6.42935700   |
| B | 0.00000000  | -7.01734400 | 7.31433700   |
| B | 0.00000000  | -1.38085900 | -10.51409000 |
| B | 0.00000000  | 1.38085900  | -10.51409000 |
| B | 0.00000000  | 7.01734400  | 7.31433700   |
| B | 0.00000000  | 8.29927600  | 6.42935700   |
| B | 0.00000000  | 8.37388300  | 4.87690100   |
| B | 0.00000000  | -1.40733700 | 10.58001200  |
| B | 0.00000000  | 0.00000000  | 11.24013200  |
| B | 0.00000000  | 1.40733700  | 10.58001200  |
| B | 0.00000000  | 0.00000000  | -11.23576500 |
| B | -1.64360400 | -4.29279300 | -5.79877800  |

|   |             |            |             |
|---|-------------|------------|-------------|
| B | 1.64360400  | 4.29279300 | -5.79877800 |
| B | 1.34107400  | 0.00000000 | 10.03554000 |
| B | -1.34107400 | 0.00000000 | 10.03554000 |

(I)  $D_{2h}$  B<sub>372</sub> (XII)

|   |             |             |             |
|---|-------------|-------------|-------------|
| B | -2.44841000 | 10.02677900 | 1.48786700  |
| B | -7.55765400 | 7.14860100  | 1.75413300  |
| B | 2.44841000  | 10.02677900 | -1.48786700 |
| B | 1.61260200  | 8.46071000  | -1.54549900 |
| B | -1.61260200 | 8.46071000  | -1.54549900 |
| B | -2.44841000 | 10.02677900 | -1.48786700 |
| B | -2.44113600 | 7.02684600  | -1.80792700 |
| B | 0.00000000  | 8.36842100  | -0.84530800 |
| B | -0.82846800 | 10.00394300 | -1.47965300 |
| B | -3.28898100 | 8.37026400  | -0.84906300 |
| B | -0.81513500 | 6.96155600  | -1.73531200 |
| B | 0.81513500  | 6.96155600  | -1.73531200 |
| B | 3.28898100  | 8.37026400  | -0.84906300 |
| B | 0.82846800  | 10.00394300 | -1.47965300 |
| B | 1.61260200  | 8.46071000  | 1.54549900  |
| B | -1.61260200 | 8.46071000  | 1.54549900  |
| B | 2.44113600  | 7.02684600  | 1.80792700  |
| B | 2.44841000  | 10.02677900 | 1.48786700  |
| B | 0.00000000  | 8.36842100  | 0.84530800  |
| B | -3.28898100 | 8.37026400  | 0.84906300  |
| B | -0.81513500 | 6.96155600  | 1.73531200  |
| B | -0.82846800 | 10.00394300 | 1.47965300  |
| B | 3.28898100  | 8.37026400  | 0.84906300  |
| B | 0.82846800  | 10.00394300 | 1.47965300  |
| B | 0.81513500  | 6.96155600  | 1.73531200  |
| B | -3.36891200 | 5.61406900  | -1.69176400 |
| B | -6.58934600 | 5.64445500  | -1.72026600 |
| B | -7.55765400 | 7.14860100  | -1.75413300 |
| B | -7.43435700 | 4.23261200  | -1.69853200 |
| B | -4.93048400 | 5.67867300  | -0.84868200 |
| B | -5.80888500 | 7.09594300  | -1.75758500 |
| B | -8.44867400 | 5.77411100  | -1.51127100 |
| B | -5.77322200 | 4.15613600  | -1.77520700 |
| B | -4.16549900 | 4.11999100  | -1.73060100 |
| B | -1.74277100 | 5.63149900  | -0.88490900 |
| B | -4.14036700 | 7.09798600  | -1.80062300 |
| B | -3.36891200 | 5.61406900  | 1.69176400  |
| B | -6.58934600 | 5.64445500  | 1.72026600  |
| B | -2.47050000 | 4.21181200  | 1.72974000  |
| B | -2.44113600 | 7.02684600  | 1.80792700  |
| B | -4.93048400 | 5.67867300  | 0.84868200  |
| B | -8.44867400 | 5.77411100  | 1.51127100  |

|   |              |            |             |
|---|--------------|------------|-------------|
| B | -5.77322200  | 4.15613600 | 1.77520700  |
| B | -5.80888500  | 7.09594300 | 1.75758500  |
| B | -1.74277100  | 5.63149900 | 0.88490900  |
| B | -4.14036700  | 7.09798600 | 1.80062300  |
| B | -4.16549900  | 4.11999100 | 1.73060100  |
| B | -8.30740700  | 2.84711400 | -1.57739800 |
| B | -10.08823700 | 2.92953400 | -1.48218800 |
| B | -9.09306300  | 1.40901000 | -1.75683700 |
| B | -6.63555500  | 2.81413300 | -0.87518500 |
| B | -9.23772400  | 4.33239200 | -1.75636000 |
| B | -8.30740700  | 2.84711400 | 1.57739800  |
| B | -7.41577300  | 1.43577400 | 1.76821000  |
| B | -7.43435700  | 4.23261200 | 1.69853200  |
| B | -10.08823700 | 2.92953400 | 1.48218800  |
| B | -6.63555500  | 2.81413300 | 0.87518500  |
| B | -9.23772400  | 4.33239200 | 1.75636000  |
| B | -9.09306300  | 1.40901000 | 1.75683700  |
| B | 7.55765400   | 7.14860100 | -1.75413300 |
| B | 6.58934600   | 5.64445500 | -1.72026600 |
| B | 3.36891200   | 5.61406900 | -1.69176400 |
| B | 2.44113600   | 7.02684600 | -1.80792700 |
| B | 2.47050000   | 4.21181200 | -1.72974000 |
| B | 4.93048400   | 5.67867300 | -0.84868200 |
| B | 4.14036700   | 7.09798600 | -1.80062300 |
| B | 1.74277100   | 5.63149900 | -0.88490900 |
| B | 4.16549900   | 4.11999100 | -1.73060100 |
| B | 5.77322200   | 4.15613600 | -1.77520700 |
| B | 8.44867400   | 5.77411100 | -1.51127100 |
| B | 5.80888500   | 7.09594300 | -1.75758500 |
| B | 6.58934600   | 5.64445500 | 1.72026600  |
| B | 3.36891200   | 5.61406900 | 1.69176400  |
| B | 7.43435700   | 4.23261200 | 1.69853200  |
| B | 7.55765400   | 7.14860100 | 1.75413300  |
| B | 4.93048400   | 5.67867300 | 0.84868200  |
| B | 1.74277100   | 5.63149900 | 0.88490900  |
| B | 4.16549900   | 4.11999100 | 1.73060100  |
| B | 4.14036700   | 7.09798600 | 1.80062300  |
| B | 8.44867400   | 5.77411100 | 1.51127100  |
| B | 5.80888500   | 7.09594300 | 1.75758500  |
| B | 5.77322200   | 4.15613600 | 1.77520700  |
| B | 1.57312400   | 2.81174400 | -1.68037600 |
| B | -1.57312400  | 2.81174400 | -1.68037600 |
| B | -2.47050000  | 4.21181200 | -1.72974000 |

|   |              |             |             |
|---|--------------|-------------|-------------|
| B | -2.48144100  | 1.40581200  | -1.71840500 |
| B | 0.00000000   | 2.82111500  | -0.84569600 |
| B | -0.79539300  | 4.33420000  | -1.73420500 |
| B | -3.23109400  | 2.82520900  | -0.87831500 |
| B | -0.79724400  | 1.29218400  | -1.71979900 |
| B | 0.79724400   | 1.29218400  | -1.71979900 |
| B | 3.23109400   | 2.82520900  | -0.87831500 |
| B | 0.79539300   | 4.33420000  | -1.73420500 |
| B | 1.57312400   | 2.81174400  | 1.68037600  |
| B | -1.57312400  | 2.81174400  | 1.68037600  |
| B | 2.48144100   | 1.40581200  | 1.71840500  |
| B | 2.47050000   | 4.21181200  | 1.72974000  |
| B | 0.00000000   | 2.82111500  | 0.84569600  |
| B | -3.23109400  | 2.82520900  | 0.87831500  |
| B | -0.79724400  | 1.29218400  | 1.71979900  |
| B | -0.79539300  | 4.33420000  | 1.73420500  |
| B | 3.23109400   | 2.82520900  | 0.87831500  |
| B | 0.79539300   | 4.33420000  | 1.73420500  |
| B | 0.79724400   | 1.29218400  | 1.71979900  |
| B | -3.37923400  | 0.00000000  | -1.65688700 |
| B | -6.53852000  | 0.00000000  | -1.74538500 |
| B | -7.41577300  | 1.43577400  | -1.76821000 |
| B | -7.41577300  | -1.43577400 | -1.76821000 |
| B | -4.96525000  | 0.00000000  | -0.84984000 |
| B | -5.74654700  | 1.51455600  | -1.74444300 |
| B | -8.13492500  | 0.00000000  | -0.83835500 |
| B | -5.74654700  | -1.51455600 | -1.74444300 |
| B | -4.15912000  | -1.52051200 | -1.72045800 |
| B | -1.73249600  | 0.00000000  | -0.87482400 |
| B | -4.15912000  | 1.52051200  | -1.72045800 |
| B | -3.37923400  | 0.00000000  | 1.65688700  |
| B | -6.53852000  | 0.00000000  | 1.74538500  |
| B | -2.48144100  | -1.40581200 | 1.71840500  |
| B | -2.48144100  | 1.40581200  | 1.71840500  |
| B | -4.96525000  | 0.00000000  | 0.84984000  |
| B | -8.13492500  | 0.00000000  | 0.83835500  |
| B | -5.74654700  | -1.51455600 | 1.74444300  |
| B | -5.74654700  | 1.51455600  | 1.74444300  |
| B | -1.73249600  | 0.00000000  | 0.87482400  |
| B | -4.15912000  | 1.52051200  | 1.72045800  |
| B | -4.15912000  | -1.52051200 | 1.72045800  |
| B | -8.30740700  | -2.84711400 | -1.57739800 |
| B | -10.08823700 | -2.92953400 | -1.48218800 |



|   |              |             |             |
|---|--------------|-------------|-------------|
| B | -9.23772400  | -4.33239200 | -1.75636000 |
| B | -6.63555500  | -2.81413300 | -0.87518500 |
| B | -9.09306300  | -1.40901000 | -1.75683700 |
| B | -8.30740700  | -2.84711400 | 1.57739800  |
| B | -7.43435700  | -4.23261200 | 1.69853200  |
| B | -7.41577300  | -1.43577400 | 1.76821000  |
| B | -10.08823700 | -2.92953400 | 1.48218800  |
| B | -6.63555500  | -2.81413300 | 0.87518500  |
| B | -9.09306300  | -1.40901000 | 1.75683700  |
| B | -9.23772400  | -4.33239200 | 1.75636000  |
| B | 8.30740700   | 2.84711400  | -1.57739800 |
| B | 7.43435700   | 4.23261200  | -1.69853200 |
| B | 7.41577300   | 1.43577400  | -1.76821000 |
| B | 10.08823700  | 2.92953400  | -1.48218800 |
| B | 9.23772400   | 4.33239200  | -1.75636000 |
| B | 6.63555500   | 2.81413300  | -0.87518500 |
| B | 9.09306300   | 1.40901000  | -1.75683700 |
| B | 8.30740700   | 2.84711400  | 1.57739800  |
| B | 10.08823700  | 2.92953400  | 1.48218800  |
| B | 6.63555500   | 2.81413300  | 0.87518500  |
| B | 9.09306300   | 1.40901000  | 1.75683700  |
| B | 9.23772400   | 4.33239200  | 1.75636000  |
| B | 6.53852000   | 0.00000000  | -1.74538500 |
| B | 3.37923400   | 0.00000000  | -1.65688700 |
| B | 2.48144100   | 1.40581200  | -1.71840500 |
| B | 2.48144100   | -1.40581200 | -1.71840500 |
| B | 4.96525000   | 0.00000000  | -0.84984000 |
| B | 4.15912000   | 1.52051200  | -1.72045800 |
| B | 1.73249600   | 0.00000000  | -0.87482400 |
| B | 4.15912000   | -1.52051200 | -1.72045800 |
| B | 5.74654700   | -1.51455600 | -1.74444300 |
| B | 8.13492500   | 0.00000000  | -0.83835500 |
| B | 5.74654700   | 1.51455600  | -1.74444300 |
| B | 6.53852000   | 0.00000000  | 1.74538500  |
| B | 3.37923400   | 0.00000000  | 1.65688700  |
| B | 7.41577300   | -1.43577400 | 1.76821000  |
| B | 7.41577300   | 1.43577400  | 1.76821000  |
| B | 4.96525000   | 0.00000000  | 0.84984000  |
| B | 1.73249600   | 0.00000000  | 0.87482400  |
| B | 4.15912000   | -1.52051200 | 1.72045800  |
| B | 4.15912000   | 1.52051200  | 1.72045800  |
| B | 8.13492500   | 0.00000000  | 0.83835500  |
| B | 5.74654700   | 1.51455600  | 1.74444300  |

|   |             |             |             |
|---|-------------|-------------|-------------|
| B | 5.74654700  | -1.51455600 | 1.74444300  |
| B | 1.57312400  | -2.81174400 | -1.68037600 |
| B | -1.57312400 | -2.81174400 | -1.68037600 |
| B | -2.48144100 | -1.40581200 | -1.71840500 |
| B | -2.47050000 | -4.21181200 | -1.72974000 |
| B | 0.00000000  | -2.82111500 | -0.84569600 |
| B | -0.79724400 | -1.29218400 | -1.71979900 |
| B | -3.23109400 | -2.82520900 | -0.87831500 |
| B | -0.79539300 | -4.33420000 | -1.73420500 |
| B | 0.79539300  | -4.33420000 | -1.73420500 |
| B | 3.23109400  | -2.82520900 | -0.87831500 |
| B | 0.79724400  | -1.29218400 | -1.71979900 |
| B | 1.57312400  | -2.81174400 | 1.68037600  |
| B | -1.57312400 | -2.81174400 | 1.68037600  |
| B | 2.47050000  | -4.21181200 | 1.72974000  |
| B | 2.48144100  | -1.40581200 | 1.71840500  |
| B | 0.00000000  | -2.82111500 | 0.84569600  |
| B | -3.23109400 | -2.82520900 | 0.87831500  |
| B | -0.79539300 | -4.33420000 | 1.73420500  |
| B | -0.79724400 | -1.29218400 | 1.71979900  |
| B | 3.23109400  | -2.82520900 | 0.87831500  |
| B | 0.79724400  | -1.29218400 | 1.71979900  |
| B | 0.79539300  | -4.33420000 | 1.73420500  |
| B | -3.36891200 | -5.61406900 | -1.69176400 |
| B | -6.58934600 | -5.64445500 | -1.72026600 |
| B | -7.43435700 | -4.23261200 | -1.69853200 |
| B | -7.55765400 | -7.14860100 | -1.75413300 |
| B | -4.93048400 | -5.67867300 | -0.84868200 |
| B | -5.77322200 | -4.15613600 | -1.77520700 |
| B | -8.44867400 | -5.77411100 | -1.51127100 |
| B | -5.80888500 | -7.09594300 | -1.75758500 |
| B | -4.14036700 | -7.09798600 | -1.80062300 |
| B | -1.74277100 | -5.63149900 | -0.88490900 |
| B | -4.16549900 | -4.11999100 | -1.73060100 |
| B | -3.36891200 | -5.61406900 | 1.69176400  |
| B | -6.58934600 | -5.64445500 | 1.72026600  |
| B | -2.44113600 | -7.02684600 | 1.80792700  |
| B | -2.47050000 | -4.21181200 | 1.72974000  |
| B | -4.93048400 | -5.67867300 | 0.84868200  |
| B | -8.44867400 | -5.77411100 | 1.51127100  |
| B | -5.80888500 | -7.09594300 | 1.75758500  |
| B | -5.77322200 | -4.15613600 | 1.77520700  |
| B | -1.74277100 | -5.63149900 | 0.88490900  |

|   |             |              |             |
|---|-------------|--------------|-------------|
| B | -4.16549900 | -4.11999100  | 1.73060100  |
| B | -4.14036700 | -7.09798600  | 1.80062300  |
| B | 8.30740700  | -2.84711400  | -1.57739800 |
| B | 7.41577300  | -1.43577400  | -1.76821000 |
| B | 7.43435700  | -4.23261200  | -1.69853200 |
| B | 10.08823700 | -2.92953400  | -1.48218800 |
| B | 9.09306300  | -1.40901000  | -1.75683700 |
| B | 6.63555500  | -2.81413300  | -0.87518500 |
| B | 9.23772400  | -4.33239200  | -1.75636000 |
| B | 8.30740700  | -2.84711400  | 1.57739800  |
| B | 10.08823700 | -2.92953400  | 1.48218800  |
| B | 6.63555500  | -2.81413300  | 0.87518500  |
| B | 9.23772400  | -4.33239200  | 1.75636000  |
| B | 9.09306300  | -1.40901000  | 1.75683700  |
| B | 6.58934600  | -5.64445500  | -1.72026600 |
| B | 3.36891200  | -5.61406900  | -1.69176400 |
| B | 2.47050000  | -4.21181200  | -1.72974000 |
| B | 2.44113600  | -7.02684600  | -1.80792700 |
| B | 4.93048400  | -5.67867300  | -0.84868200 |
| B | 4.16549900  | -4.11999100  | -1.73060100 |
| B | 1.74277100  | -5.63149900  | -0.88490900 |
| B | 4.14036700  | -7.09798600  | -1.80062300 |
| B | 5.80888500  | -7.09594300  | -1.75758500 |
| B | 8.44867400  | -5.77411100  | -1.51127100 |
| B | 5.77322200  | -4.15613600  | -1.77520700 |
| B | 6.58934600  | -5.64445500  | 1.72026600  |
| B | 3.36891200  | -5.61406900  | 1.69176400  |
| B | 7.55765400  | -7.14860100  | 1.75413300  |
| B | 7.43435700  | -4.23261200  | 1.69853200  |
| B | 4.93048400  | -5.67867300  | 0.84868200  |
| B | 1.74277100  | -5.63149900  | 0.88490900  |
| B | 4.14036700  | -7.09798600  | 1.80062300  |
| B | 4.16549900  | -4.11999100  | 1.73060100  |
| B | 8.44867400  | -5.77411100  | 1.51127100  |
| B | 5.77322200  | -4.15613600  | 1.77520700  |
| B | 5.80888500  | -7.09594300  | 1.75758500  |
| B | 1.61260200  | -8.46071000  | -1.54549900 |
| B | -1.61260200 | -8.46071000  | -1.54549900 |
| B | -2.44113600 | -7.02684600  | -1.80792700 |
| B | -2.44841000 | -10.02677900 | -1.48786700 |
| B | 0.00000000  | -8.36842100  | -0.84530800 |
| B | -0.81513500 | -6.96155600  | -1.73531200 |
| B | -3.28898100 | -8.37026400  | -0.84906300 |

|   |             |              |             |
|---|-------------|--------------|-------------|
| B | -0.82846800 | -10.00394300 | -1.47965300 |
| B | 0.82846800  | -10.00394300 | -1.47965300 |
| B | 3.28898100  | -8.37026400  | -0.84906300 |
| B | 0.81513500  | -6.96155600  | -1.73531200 |
| B | 1.61260200  | -8.46071000  | 1.54549900  |
| B | -1.61260200 | -8.46071000  | 1.54549900  |
| B | 2.44841000  | -10.02677900 | 1.48786700  |
| B | 2.44113600  | -7.02684600  | 1.80792700  |
| B | 0.00000000  | -8.36842100  | 0.84530800  |
| B | -3.28898100 | -8.37026400  | 0.84906300  |
| B | -0.82846800 | -10.00394300 | 1.47965300  |
| B | -0.81513500 | -6.96155600  | 1.73531200  |
| B | 3.28898100  | -8.37026400  | 0.84906300  |
| B | 0.81513500  | -6.96155600  | 1.73531200  |
| B | 0.82846800  | -10.00394300 | 1.47965300  |
| B | -7.55765400 | -7.14860100  | 1.75413300  |
| B | 2.44841000  | -10.02677900 | -1.48786700 |
| B | 7.55765400  | -7.14860100  | -1.75413300 |
| B | -2.44841000 | -10.02677900 | 1.48786700  |
| B | 4.95150500  | -8.58400900  | -1.69721900 |
| B | 6.71793800  | -8.54365700  | -1.46127600 |
| B | 6.71793800  | -8.54365700  | 1.46127600  |
| B | 4.07524900  | -10.01585200 | -1.39380900 |
| B | 5.84346400  | -10.00905300 | -1.31025200 |
| B | 4.07524900  | -10.01585200 | 1.39380900  |
| B | 4.95150500  | -8.58400900  | 1.69721900  |
| B | 5.84346400  | -10.00905300 | 1.31025200  |
| B | -4.95150500 | -8.58400900  | -1.69721900 |
| B | -4.07524900 | -10.01585200 | -1.39380900 |
| B | -4.07524900 | -10.01585200 | 1.39380900  |
| B | -6.71793800 | -8.54365700  | -1.46127600 |
| B | -5.84346400 | -10.00905300 | -1.31025200 |
| B | -6.71793800 | -8.54365700  | 1.46127600  |
| B | -4.95150500 | -8.58400900  | 1.69721900  |
| B | -5.84346400 | -10.00905300 | 1.31025200  |
| B | -5.84346400 | 10.00905300  | -1.31025200 |
| B | -4.07524900 | 10.01585200  | -1.39380900 |
| B | -4.07524900 | 10.01585200  | 1.39380900  |
| B | -6.71793800 | 8.54365700   | -1.46127600 |
| B | -4.95150500 | 8.58400900   | -1.69721900 |
| B | -6.71793800 | 8.54365700   | 1.46127600  |
| B | -5.84346400 | 10.00905300  | 1.31025200  |
| B | -4.95150500 | 8.58400900   | 1.69721900  |

|   |              |             |             |
|---|--------------|-------------|-------------|
| B | 5.84346400   | 10.00905300 | -1.31025200 |
| B | 6.71793800   | 8.54365700  | -1.46127600 |
| B | 6.71793800   | 8.54365700  | 1.46127600  |
| B | 4.07524900   | 10.01585200 | -1.39380900 |
| B | 4.95150500   | 8.58400900  | -1.69721900 |
| B | 4.07524900   | 10.01585200 | 1.39380900  |
| B | 5.84346400   | 10.00905300 | 1.31025200  |
| B | 4.95150500   | 8.58400900  | 1.69721900  |
| B | 9.88425500   | 0.00000000  | -1.58465800 |
| B | 10.83098100  | 1.44824800  | -1.62642500 |
| B | 10.83098100  | 1.44824800  | 1.62642500  |
| B | 10.83098100  | -1.44824800 | -1.62642500 |
| B | 11.65669200  | 0.00000000  | -1.33465100 |
| B | 10.83098100  | -1.44824800 | 1.62642500  |
| B | 9.88425500   | 0.00000000  | 1.58465800  |
| B | 11.65669200  | 0.00000000  | 1.33465100  |
| B | -11.65669200 | 0.00000000  | -1.33465100 |
| B | -10.83098100 | 1.44824800  | -1.62642500 |
| B | -10.83098100 | 1.44824800  | 1.62642500  |
| B | -10.83098100 | -1.44824800 | -1.62642500 |
| B | -9.88425500  | 0.00000000  | -1.58465800 |
| B | -10.83098100 | -1.44824800 | 1.62642500  |
| B | -11.65669200 | 0.00000000  | 1.33465100  |
| B | -9.88425500  | 0.00000000  | 1.58465800  |
| B | -4.81752100  | 11.12533400 | 0.00000000  |
| B | -3.25116900  | 11.11728100 | 0.00000000  |
| B | -1.58970200  | 10.93596800 | 0.00000000  |
| B | 0.00000000   | 11.33543200 | 0.00000000  |
| B | 1.58970200   | 10.93596800 | 0.00000000  |
| B | 3.25116900   | 11.11728100 | 0.00000000  |
| B | 4.81752100   | 11.12533400 | 0.00000000  |
| B | 6.41906000   | 11.02848500 | 0.00000000  |
| B | -6.41906000  | 11.02848500 | 0.00000000  |
| B | 7.19804700   | 9.65710200  | 0.00000000  |
| B | 7.93344600   | 8.24316300  | 0.00000000  |
| B | 8.82845300   | 6.88714300  | 0.00000000  |
| B | 9.61193000   | 5.51773800  | 0.00000000  |
| B | 10.49516600  | 4.12418900  | 0.00000000  |
| B | 11.22884200  | 2.69934100  | 0.00000000  |
| B | 12.28415300  | 1.43282900  | 0.00000000  |
| B | 12.88300100  | 0.00000000  | 0.00000000  |
| B | 12.28415300  | -1.43282900 | 0.00000000  |
| B | 11.22884200  | -2.69934100 | 0.00000000  |

|   |              |              |            |
|---|--------------|--------------|------------|
| B | 10.49516600  | -4.12418900  | 0.00000000 |
| B | 9.61193000   | -5.51773800  | 0.00000000 |
| B | 8.82845300   | -6.88714300  | 0.00000000 |
| B | 7.93344600   | -8.24316300  | 0.00000000 |
| B | 7.19804700   | -9.65710200  | 0.00000000 |
| B | 6.41906000   | -11.02848500 | 0.00000000 |
| B | 4.81752100   | -11.12533400 | 0.00000000 |
| B | 3.25116900   | -11.11728100 | 0.00000000 |
| B | 1.58970200   | -10.93596800 | 0.00000000 |
| B | 0.00000000   | -11.33543200 | 0.00000000 |
| B | -1.58970200  | -10.93596800 | 0.00000000 |
| B | -3.25116900  | -11.11728100 | 0.00000000 |
| B | -4.81752100  | -11.12533400 | 0.00000000 |
| B | -6.41906000  | -11.02848500 | 0.00000000 |
| B | -7.19804700  | -9.65710200  | 0.00000000 |
| B | -7.93344600  | -8.24316300  | 0.00000000 |
| B | -8.82845300  | -6.88714300  | 0.00000000 |
| B | -9.61193000  | -5.51773800  | 0.00000000 |
| B | -10.49516600 | -4.12418900  | 0.00000000 |
| B | -11.22884200 | -2.69934100  | 0.00000000 |
| B | -12.28415300 | -1.43282900  | 0.00000000 |
| B | -12.88300100 | 0.00000000   | 0.00000000 |
| B | -12.28415300 | 1.43282900   | 0.00000000 |
| B | -11.22884200 | 2.69934100   | 0.00000000 |
| B | -10.49516600 | 4.12418900   | 0.00000000 |
| B | -9.61193000  | 5.51773800   | 0.00000000 |
| B | -8.82845300  | 6.88714300   | 0.00000000 |
| B | -7.93344600  | 8.24316300   | 0.00000000 |
| B | -7.19804700  | 9.65710200   | 0.00000000 |

(m)  $D_2 B_{822}$  (XIII)

|   |              |             |             |
|---|--------------|-------------|-------------|
| B | -4.10066125  | 15.65875150 | 1.46436461  |
| B | -5.69742586  | 15.81117476 | -1.48678327 |
| B | -4.09592794  | 15.69203131 | -1.49131387 |
| B | -5.74713896  | 15.73798446 | 1.42287781  |
| B | -9.17836127  | 12.93232325 | 2.20068094  |
| B | -10.82396211 | 12.88950738 | -1.49726859 |
| B | -9.16737172  | 12.87351589 | -2.07551565 |
| B | -10.74207676 | 12.78891526 | 1.47027924  |
| B | -9.07223059  | 15.73707411 | 1.18281478  |
| B | -8.23296202  | 14.19957159 | 1.69686011  |
| B | -6.61790245  | 13.98963906 | 0.84948009  |
| B | -6.61770461  | 13.97717733 | -0.87519639 |
| B | -8.23703520  | 14.19863634 | -1.62729723 |
| B | -7.31755776  | 15.64071108 | -1.44518817 |
| B | -7.37914945  | 15.63932782 | 1.46898426  |
| B | -9.96430195  | 14.26513009 | 1.48013895  |
| B | -9.90322311  | 14.25244127 | -1.40922297 |
| B | -11.61722471 | 11.41037732 | 1.49940003  |
| B | -11.66121052 | 11.47814868 | -1.43613793 |
| B | 5.69742586   | 15.81117476 | 1.48678327  |
| B | 4.10066125   | 15.65875150 | -1.46436461 |
| B | 5.74713896   | 15.73798446 | -1.42287781 |
| B | 4.09592794   | 15.69203131 | 1.49131387  |
| B | -0.80935794  | 15.65371416 | 1.45387902  |
| B | 0.81203100   | 12.60082212 | 1.74216886  |
| B | -0.81337700  | 15.66225536 | -1.48760349 |
| B | -0.81088876  | 12.59441742 | 1.74045819  |
| B | 0.81337700   | 15.66225536 | 1.48760349  |
| B | 1.62529558   | 14.09838865 | 1.54391668  |
| B | -3.28692739  | 13.98825278 | 0.85679260  |
| B | -1.63522236  | 14.09261323 | 1.53947563  |
| B | 3.27641360   | 13.99639420 | 0.86709038  |
| B | -1.62529558  | 14.09838865 | -1.54391668 |
| B | 3.28692739   | 13.98825278 | -0.85679260 |
| B | 1.63522236   | 14.09261323 | -1.53947563 |
| B | -3.27641360  | 13.99639420 | -0.86709038 |
| B | -2.45135343  | 15.65088188 | 1.48468176  |
| B | 2.45135343   | 15.65088188 | -1.48468176 |
| B | -2.45030035  | 15.63739838 | -1.43915866 |
| B | 2.45030035   | 15.63739838 | 1.43915866  |
| B | -0.00510975  | 13.98668619 | 0.85344813  |
| B | 0.00510975   | 13.98668619 | -0.85344813 |

|   |              |             |             |
|---|--------------|-------------|-------------|
| B | -5.80310740  | 12.70072665 | 1.77097447  |
| B | -4.13787386  | 9.73998005  | 1.73545182  |
| B | -4.14848161  | 12.70710907 | -1.78341146 |
| B | -5.75291923  | 9.72612308  | -1.76767544 |
| B | -4.15357907  | 9.74824470  | -1.72391018 |
| B | -5.78692317  | 12.70594872 | -1.80749689 |
| B | -5.73189478  | 9.72363310  | 1.77907256  |
| B | -4.14829776  | 12.69674516 | 1.76277230  |
| B | -3.35889712  | 11.23122431 | 1.69759838  |
| B | -6.57059961  | 11.23140419 | 1.77754266  |
| B | -1.72513275  | 11.25080454 | 0.89103805  |
| B | -6.57898901  | 11.23083075 | -1.77504076 |
| B | -1.72915200  | 11.25340570 | -0.88147341 |
| B | -3.36211058  | 11.23475976 | -1.68781855 |
| B | -8.14585159  | 11.14993328 | -0.83367684 |
| B | -7.51254400  | 12.63309521 | 1.61976602  |
| B | -2.44320757  | 12.64168008 | -1.74564337 |
| B | -2.44218138  | 12.64271719 | 1.76303835  |
| B | -4.96088193  | 11.26645993 | 0.85807175  |
| B | -4.96213706  | 11.26312868 | -0.86066698 |
| B | -10.71308884 | 9.95889183  | 1.92933437  |
| B | -9.09102053  | 6.93672837  | 1.73908613  |
| B | -9.09791978  | 9.90636788  | -1.70976146 |
| B | -10.75106449 | 7.03047196  | -1.74120276 |
| B | -9.13051523  | 6.95328365  | -1.69196840 |
| B | -10.77254362 | 9.97292790  | -1.73733973 |
| B | -10.69924911 | 7.00070221  | 1.78373791  |
| B | -9.06582628  | 9.89771573  | 1.81661065  |
| B | -8.28852016  | 8.40250221  | 1.70788262  |
| B | -13.26409195 | 8.61945325  | 1.49599052  |
| B | -11.48316360 | 8.51527464  | 1.75242404  |
| B | -6.65748674  | 8.41492560  | 0.89340040  |
| B | -11.54315099 | 8.53175241  | -1.63213432 |
| B | -6.67171052  | 8.41761062  | -0.88208796 |
| B | -8.32050493  | 8.41116028  | -1.66908533 |
| B | -13.37476243 | 8.60614742  | -1.39800753 |
| B | -12.40842892 | 10.00152872 | 1.70025378  |
| B | -7.40302798  | 9.78666151  | -1.69662565 |
| B | -12.48518735 | 10.02204695 | -1.45628503 |
| B | -7.37417308  | 9.78081980  | 1.71276914  |
| B | -9.85199147  | 8.46150516  | 0.89172295  |
| B | -9.87337237  | 8.46533763  | -0.81180613 |
| B | -14.02148669 | 4.32960247  | 1.93054507  |



|   |              |             |             |
|---|--------------|-------------|-------------|
| B | -15.83230271 | 4.35192457  | -1.61934643 |
| B | -14.13263663 | 4.35521122  | -1.96123948 |
| B | -15.73030877 | 4.36642706  | 1.65390503  |
| B | -14.15241304 | 7.25516373  | 1.63299434  |
| B | -13.22362976 | 5.73417742  | 1.63344195  |
| B | -11.57781680 | 5.67075480  | 0.88848537  |
| B | -13.28275657 | 5.71760572  | -1.52472243 |
| B | -12.39756441 | 7.10828384  | -1.72972189 |
| B | -12.34101623 | 7.10213015  | 1.77853465  |
| B | -14.93438210 | 5.79445676  | 1.52092419  |
| B | -15.01353683 | 5.79001422  | -1.47028427 |
| B | -16.52624998 | 2.93370283  | 1.53781469  |
| B | 10.82396211  | 12.88950738 | 1.49726859  |
| B | 9.17836127   | 12.93232325 | -2.20068094 |
| B | 10.74207676  | 12.78891526 | -1.47027924 |
| B | 9.16737172   | 12.87351589 | 2.07551565  |
| B | 6.61770461   | 13.97717733 | 0.87519639  |
| B | 8.23703520   | 14.19863634 | 1.62729723  |
| B | 8.23296202   | 14.19957159 | -1.69686011 |
| B | 7.31755776   | 15.64071108 | 1.44518817  |
| B | 7.37914945   | 15.63932782 | -1.46898426 |
| B | 9.90322311   | 14.25244127 | 1.40922297  |
| B | 9.96430195   | 14.26513009 | -1.48013895 |
| B | 4.14848161   | 12.70710907 | 1.78341146  |
| B | 5.75291923   | 9.72612308  | 1.76767544  |
| B | 5.80310740   | 12.70072665 | -1.77097447 |
| B | 4.13787386   | 9.73998005  | -1.73545182 |
| B | 5.73189478   | 9.72363310  | -1.77907256 |
| B | 4.14829776   | 12.69674516 | -1.76277230 |
| B | 4.15357907   | 9.74824470  | 1.72391018  |
| B | 5.78692317   | 12.70594872 | 1.80749689  |
| B | 6.57898901   | 11.23083075 | 1.77504076  |
| B | 1.72915200   | 11.25340570 | 0.88147341  |
| B | 3.36211058   | 11.23475976 | 1.68781855  |
| B | 8.14585159   | 11.14993328 | 0.83367684  |
| B | 3.35889712   | 11.23122431 | -1.69759838 |
| B | 8.12847126   | 11.12427875 | -0.86160011 |
| B | 6.57059961   | 11.23140419 | -1.77754266 |
| B | 1.72513275   | 11.25080454 | -0.89103805 |
| B | 2.44320757   | 12.64168008 | 1.74564337  |
| B | 2.44218138   | 12.64271719 | -1.76303835 |
| B | 7.48882555   | 12.62374500 | 1.66172751  |
| B | 4.96213706   | 11.26312868 | 0.86066698  |

|   |             |             |             |
|---|-------------|-------------|-------------|
| B | 4.96088193  | 11.26645993 | -0.85807175 |
| B | -0.79270011 | 9.94148178  | 1.73099232  |
| B | 0.81011277  | 6.91725911  | 1.70860940  |
| B | 0.79270011  | 9.94148178  | -1.73099232 |
| B | -0.81011277 | 6.91725911  | -1.70860940 |
| B | 0.79484518  | 6.91624840  | -1.71030232 |
| B | -0.80477481 | 9.94292113  | -1.72426536 |
| B | -0.79484518 | 6.91624840  | 1.71030232  |
| B | 0.80477481  | 9.94292113  | 1.72426536  |
| B | 1.58023264  | 8.42714351  | 1.66866575  |
| B | -3.22621308 | 8.43163859  | 0.88601801  |
| B | -1.56465714 | 8.42454810  | 1.67101784  |
| B | 3.24142510  | 8.43511629  | 0.88263468  |
| B | -1.58023264 | 8.42714351  | -1.66866575 |
| B | 3.22621308  | 8.43163859  | -0.88601801 |
| B | 1.56465714  | 8.42454810  | -1.67101784 |
| B | -3.24142510 | 8.43511629  | -0.88263468 |
| B | -2.45420640 | 9.82679640  | 1.69121179  |
| B | 2.45420640  | 9.82679640  | -1.69121179 |
| B | -2.46649136 | 9.82878003  | -1.69434601 |
| B | 2.46649136  | 9.82878003  | 1.69434601  |
| B | 0.00602891  | 8.42922876  | 0.85161903  |
| B | -0.00602891 | 8.42922876  | -0.85161903 |
| B | -5.73901287 | 7.11252327  | 1.73631890  |
| B | -4.14692878 | 4.10287789  | 1.71692255  |
| B | -4.15945853 | 7.12368358  | -1.72087258 |
| B | -5.76474480 | 4.10902610  | -1.71186310 |
| B | -4.16109568 | 4.10514332  | -1.71407150 |
| B | -5.76260978 | 7.11894241  | -1.73522865 |
| B | -5.74734433 | 4.09871477  | 1.71720481  |
| B | -4.13957103 | 7.12173882  | 1.72689252  |
| B | -3.36959312 | 5.61142465  | 1.66892169  |
| B | -8.17909202 | 5.62370117  | 0.89153849  |
| B | -6.51567951 | 5.60582122  | 1.67163276  |
| B | -1.72297083 | 5.61166293  | 0.88136551  |
| B | -6.53768240 | 5.61353412  | -1.67416427 |
| B | -1.73262119 | 5.61391028  | -0.88317979 |
| B | -3.38334443 | 5.61441510  | -1.66920398 |
| B | -8.20284776 | 5.62835560  | -0.87946148 |
| B | -7.40887498 | 6.99692134  | 1.73548272  |
| B | -2.48444581 | 7.02277327  | -1.69717157 |
| B | -7.43731984 | 7.00549958  | -1.71606619 |
| B | -2.46734334 | 7.01916448  | 1.69653960  |

|   |              |             |             |
|---|--------------|-------------|-------------|
| B | -4.94519274  | 5.61460415  | 0.85279425  |
| B | -4.95863514  | 5.61729393  | -0.85298610 |
| B | -10.69601134 | 4.34182499  | 1.72915759  |
| B | -9.09227959  | 1.30397892  | 1.71405045  |
| B | -9.12914167  | 4.32384763  | -1.70532636 |
| B | -10.69306614 | 1.33648354  | -1.72351268 |
| B | -9.10296240  | 1.31084602  | -1.71250382 |
| B | -10.73735009 | 4.34988338  | -1.73529878 |
| B | -10.67955115 | 1.32878864  | 1.72897907  |
| B | -9.09801944  | 4.32340982  | 1.71681105  |
| B | -8.32717520  | 2.81306321  | 1.66962521  |
| B | -13.13010954 | 2.80372303  | 0.88535122  |
| B | -11.47695318 | 2.84152815  | 1.74180352  |
| B | -6.67967412  | 2.80363905  | 0.88106109  |
| B | -11.51305116 | 2.84656116  | -1.71776031 |
| B | -6.68997082  | 2.81006985  | -0.88337295 |
| B | -8.34146517  | 2.82022681  | -1.66461573 |
| B | -13.14689484 | 2.77584242  | -0.83683803 |
| B | -12.35120565 | 4.27874787  | 1.77551271  |
| B | -7.44588618  | 4.21776776  | -1.69065385 |
| B | -12.41948536 | 4.26354740  | -1.73287491 |
| B | -7.42166650  | 4.20894620  | 1.69240311  |
| B | -9.91260670  | 2.82534999  | 0.85815825  |
| B | -9.92310443  | 2.83029797  | -0.85466460 |
| B | -15.62655994 | 1.45927870  | 1.90020170  |
| B | -14.02216479 | -1.44887655 | 1.75830653  |
| B | -14.02216479 | 1.44887655  | -1.75830653 |
| B | -15.62655994 | -1.45927870 | -1.90020170 |
| B | -13.99108660 | -1.44167578 | -1.82521667 |
| B | -15.67421797 | 1.46998741  | -1.93954117 |
| B | -15.67421797 | -1.46998741 | 1.93954117  |
| B | -13.99108660 | 1.44167578  | 1.82521667  |
| B | -13.20263748 | -0.00304298 | 1.66222385  |
| B | -18.12167237 | 0.00814705  | 1.43695960  |
| B | -16.39524814 | -0.00116674 | 1.68192031  |
| B | -11.60906440 | 0.00032782  | 0.88946438  |
| B | -16.39524814 | 0.00116674  | -1.68192031 |
| B | -11.60906440 | -0.00032782 | -0.88946438 |
| B | -13.20263748 | 0.00304298  | -1.66222385 |
| B | -17.30393871 | 1.48864550  | 1.74059396  |
| B | -12.32751667 | 1.40996665  | -1.72161058 |
| B | -17.34269397 | 1.40778207  | -1.85805131 |
| B | -12.31196797 | 1.40866586  | 1.74869636  |

|   |              |             |             |
|---|--------------|-------------|-------------|
| B | -14.76641740 | 0.01074570  | 0.86025054  |
| B | -16.65248697 | -2.89941064 | 1.46025620  |
| B | -16.52624998 | -2.93370283 | -1.53781469 |
| B | -17.30393871 | -1.48864550 | -1.74059396 |
| B | -17.34269397 | -1.40778207 | 1.85805131  |
| B | 11.66121052  | 11.47814868 | 1.43613793  |
| B | 9.09791978   | 9.90636788  | 1.70976146  |
| B | 10.75106449  | 7.03047196  | 1.74120276  |
| B | 10.71308884  | 9.95889183  | -1.92933437 |
| B | 9.09102053   | 6.93672837  | -1.73908613 |
| B | 10.69924911  | 7.00070221  | -1.78373791 |
| B | 9.06582628   | 9.89771573  | -1.81661065 |
| B | 9.13051523   | 6.95328365  | 1.69196840  |
| B | 10.77254362  | 9.97292790  | 1.73733973  |
| B | 11.54315099  | 8.53175241  | 1.63213432  |
| B | 6.67171052   | 8.41761062  | 0.88208796  |
| B | 8.32050493   | 8.41116028  | 1.66908533  |
| B | 13.37476243  | 8.60614742  | 1.39800753  |
| B | 8.28852016   | 8.40250221  | -1.70788262 |
| B | 13.26409195  | 8.61945325  | -1.49599052 |
| B | 11.48316360  | 8.51527464  | -1.75242404 |
| B | 6.65748674   | 8.41492560  | -0.89340040 |
| B | 7.40302798   | 9.78666151  | 1.69662565  |
| B | 12.40842892  | 10.00152872 | -1.70025378 |
| B | 7.37417308   | 9.78081980  | -1.71276914 |
| B | 12.48518735  | 10.02204695 | 1.45628503  |
| B | 9.87337237   | 8.46533763  | 0.81180613  |
| B | 4.15945853   | 7.12368358  | 1.72087258  |
| B | 5.76474480   | 4.10902610  | 1.71186310  |
| B | 5.73901287   | 7.11252327  | -1.73631890 |
| B | 4.14692878   | 4.10287789  | -1.71692255 |
| B | 5.74734433   | 4.09871477  | -1.71720481 |
| B | 4.13957103   | 7.12173882  | -1.72689252 |
| B | 4.16109568   | 4.10514332  | 1.71407150  |
| B | 5.76260978   | 7.11894241  | 1.73522865  |
| B | 6.53768240   | 5.61353412  | 1.67416427  |
| B | 1.73262119   | 5.61391028  | 0.88317979  |
| B | 3.38334443   | 5.61441510  | 1.66920398  |
| B | 8.20284776   | 5.62835560  | 0.87946148  |
| B | 3.36959312   | 5.61142465  | -1.66892169 |
| B | 8.17909202   | 5.62370117  | -0.89153849 |
| B | 6.51567951   | 5.60582122  | -1.67163276 |
| B | 1.72297083   | 5.61166293  | -0.88136551 |

|   |             |             |             |
|---|-------------|-------------|-------------|
| B | 2.48444581  | 7.02277327  | 1.69717157  |
| B | 7.40887498  | 6.99692134  | -1.73548272 |
| B | 2.46734334  | 7.01916448  | -1.69653960 |
| B | 7.43731984  | 7.00549958  | 1.71606619  |
| B | 4.95863514  | 5.61729393  | 0.85298610  |
| B | 4.94519274  | 5.61460415  | -0.85279425 |
| B | -0.79361756 | 4.31223099  | 1.72198383  |
| B | 0.80181867  | 1.29392995  | 1.72266930  |
| B | 0.79361756  | 4.31223099  | -1.72198383 |
| B | -0.80181867 | 1.29392995  | -1.72266930 |
| B | 0.79805474  | 1.29045647  | -1.72398772 |
| B | -0.80515868 | 4.31483721  | -1.72648987 |
| B | -0.79805474 | 1.29045647  | 1.72398772  |
| B | 0.80515868  | 4.31483721  | 1.72648987  |
| B | 1.57908610  | 2.80519090  | 1.67863095  |
| B | -3.22082940 | 2.80262811  | 0.88349251  |
| B | -1.57145577 | 2.80298274  | 1.67686773  |
| B | 3.22739760  | 2.80453925  | 0.88096804  |
| B | -1.57908610 | 2.80519090  | -1.67863095 |
| B | 3.22082940  | 2.80262811  | -0.88349251 |
| B | 1.57145577  | 2.80298274  | -1.67686773 |
| B | -3.22739760 | 2.80453925  | -0.88096804 |
| B | -2.47020166 | 4.20773768  | 1.69683391  |
| B | 2.47020166  | 4.20773768  | -1.69683391 |
| B | -2.48251022 | 4.21077089  | -1.69495947 |
| B | 2.48251022  | 4.21077089  | 1.69495947  |
| B | 0.00283266  | 2.80343262  | 0.85356579  |
| B | -0.00283266 | 2.80343262  | -0.85356579 |
| B | -5.75209715 | 1.50372200  | 1.72289465  |
| B | -4.15956427 | -1.51402028 | 1.72345949  |
| B | -4.15956427 | 1.51402028  | -1.72345949 |
| B | -5.75209715 | -1.50372200 | -1.72289465 |
| B | -4.15294214 | -1.51058420 | -1.72677630 |
| B | -5.75938153 | 1.51261332  | -1.72898161 |
| B | -5.75938153 | -1.51261332 | 1.72898161  |
| B | -4.15294214 | 1.51058420  | 1.72677630  |
| B | -3.38138371 | -0.00278349 | 1.67823735  |
| B | -8.18338752 | -0.00328421 | 0.88349755  |
| B | -6.53087419 | -0.00444118 | 1.68030724  |
| B | -1.73288383 | -0.00242603 | 0.88190295  |
| B | -6.53087419 | 0.00444118  | -1.68030724 |
| B | -1.73288383 | 0.00242603  | -0.88190295 |
| B | -3.38138371 | 0.00278349  | -1.67823735 |

|   |              |             |             |
|---|--------------|-------------|-------------|
| B | -8.18338752  | 0.00328421  | -0.88349755 |
| B | -7.42499283  | 1.40333140  | 1.69441437  |
| B | -2.47978980  | 1.40353685  | -1.69371066 |
| B | -7.43440126  | 1.41027186  | -1.69659927 |
| B | -2.47549779  | 1.40003752  | 1.69548352  |
| B | -4.95862804  | -0.00382884 | 0.85409711  |
| B | -4.95862804  | 0.00382884  | -0.85409711 |
| B | -10.69306614 | -1.33648354 | 1.72351268  |
| B | -9.12914167  | -4.32384763 | 1.70532636  |
| B | -9.09227959  | -1.30397892 | -1.71405045 |
| B | -10.69601134 | -4.34182499 | -1.72915759 |
| B | -9.09801944  | -4.32340982 | -1.71681105 |
| B | -10.67955115 | -1.32878864 | -1.72897907 |
| B | -10.73735009 | -4.34988338 | 1.73529878  |
| B | -9.10296240  | -1.31084602 | 1.71250382  |
| B | -8.34146517  | -2.82022681 | 1.66461573  |
| B | -13.14689484 | -2.77584242 | 0.83683803  |
| B | -11.51305116 | -2.84656116 | 1.71776031  |
| B | -6.68997082  | -2.81006985 | 0.88337295  |
| B | -11.47695318 | -2.84152815 | -1.74180352 |
| B | -6.67967412  | -2.80363905 | -0.88106109 |
| B | -8.32717520  | -2.81306321 | -1.66962521 |
| B | -13.13010954 | -2.80372303 | -0.88535122 |
| B | -12.32751667 | -1.40996665 | 1.72161058  |
| B | -7.42499283  | -1.40333140 | -1.69441437 |
| B | -12.31196797 | -1.40866586 | -1.74869636 |
| B | -7.43440126  | -1.41027186 | 1.69659927  |
| B | -9.92310443  | -2.83029797 | 0.85466460  |
| B | -9.91260670  | -2.82534999 | -0.85815825 |
| B | -15.83230271 | -4.35192457 | 1.61934643  |
| B | -14.15089243 | -7.20052466 | 1.70576086  |
| B | -14.02148669 | -4.32960247 | -1.93054507 |
| B | -14.15241304 | -7.25516373 | -1.63299434 |
| B | -15.73030877 | -4.36642706 | -1.65390503 |
| B | -14.13263663 | -4.35521122 | 1.96123948  |
| B | -13.28275657 | -5.71760572 | 1.52472243  |
| B | -11.61780303 | -5.64904115 | 0.88172286  |
| B | -13.22362976 | -5.73417742 | -1.63344195 |
| B | -12.35120565 | -4.27874787 | -1.77551271 |
| B | -12.41948536 | -4.26354740 | 1.73287491  |
| B | -15.01353683 | -5.79001422 | 1.47028427  |
| B | 14.15089243  | 7.20052466  | 1.70576086  |
| B | 15.83230271  | 4.35192457  | 1.61934643  |

|   |             |             |             |
|---|-------------|-------------|-------------|
| B | 14.02148669 | 4.32960247  | -1.93054507 |
| B | 15.73030877 | 4.36642706  | -1.65390503 |
| B | 14.13263663 | 4.35521122  | 1.96123948  |
| B | 11.61780303 | 5.64904115  | 0.88172286  |
| B | 13.28275657 | 5.71760572  | 1.52472243  |
| B | 13.22362976 | 5.73417742  | -1.63344195 |
| B | 11.57781680 | 5.67075480  | -0.88848537 |
| B | 12.39756441 | 7.10828384  | 1.72972189  |
| B | 12.34101623 | 7.10213015  | -1.77853465 |
| B | 15.01353683 | 5.79001422  | 1.47028427  |
| B | 14.93438210 | 5.79445676  | -1.52092419 |
| B | 9.12914167  | 4.32384763  | 1.70532636  |
| B | 10.69306614 | 1.33648354  | 1.72351268  |
| B | 10.69601134 | 4.34182499  | -1.72915759 |
| B | 9.09227959  | 1.30397892  | -1.71405045 |
| B | 10.67955115 | 1.32878864  | -1.72897907 |
| B | 9.09801944  | 4.32340982  | -1.71681105 |
| B | 9.10296240  | 1.31084602  | 1.71250382  |
| B | 10.73735009 | 4.34988338  | 1.73529878  |
| B | 11.51305116 | 2.84656116  | 1.71776031  |
| B | 6.68997082  | 2.81006985  | 0.88337295  |
| B | 8.34146517  | 2.82022681  | 1.66461573  |
| B | 13.14689484 | 2.77584242  | 0.83683803  |
| B | 8.32717520  | 2.81306321  | -1.66962521 |
| B | 13.13010954 | 2.80372303  | -0.88535122 |
| B | 11.47695318 | 2.84152815  | -1.74180352 |
| B | 6.67967412  | 2.80363905  | -0.88106109 |
| B | 7.44588618  | 4.21776776  | 1.69065385  |
| B | 7.42166650  | 4.20894620  | -1.69240311 |
| B | 12.41948536 | 4.26354740  | 1.73287491  |
| B | 9.92310443  | 2.83029797  | 0.85466460  |
| B | 9.91260670  | 2.82534999  | -0.85815825 |
| B | 4.15956427  | 1.51402028  | 1.72345949  |
| B | 5.75209715  | -1.50372200 | 1.72289465  |
| B | 5.75209715  | 1.50372200  | -1.72289465 |
| B | 4.15956427  | -1.51402028 | -1.72345949 |
| B | 5.75938153  | -1.51261332 | -1.72898161 |
| B | 4.15294214  | 1.51058420  | -1.72677630 |
| B | 4.15294214  | -1.51058420 | 1.72677630  |
| B | 5.75938153  | 1.51261332  | 1.72898161  |
| B | 6.53087419  | 0.00444118  | 1.68030724  |
| B | 1.73288383  | 0.00242603  | 0.88190295  |
| B | 3.38138371  | 0.00278349  | 1.67823735  |

|   |             |             |             |
|---|-------------|-------------|-------------|
| B | 8.18338752  | 0.00328421  | 0.88349755  |
| B | 3.38138371  | -0.00278349 | -1.67823735 |
| B | 8.18338752  | -0.00328421 | -0.88349755 |
| B | 6.53087419  | -0.00444118 | -1.68030724 |
| B | 1.73288383  | -0.00242603 | -0.88190295 |
| B | 2.47978980  | 1.40353685  | 1.69371066  |
| B | 7.42499283  | 1.40333140  | -1.69441437 |
| B | 2.47549779  | 1.40003752  | -1.69548352 |
| B | 7.43440126  | 1.41027186  | 1.69659927  |
| B | 4.95862804  | 0.00382884  | 0.85409711  |
| B | 4.95862804  | -0.00382884 | -0.85409711 |
| B | -0.80181867 | -1.29392995 | 1.72266930  |
| B | 0.79361756  | -4.31223099 | 1.72198383  |
| B | 0.80181867  | -1.29392995 | -1.72266930 |
| B | -0.79361756 | -4.31223099 | -1.72198383 |
| B | 0.80515868  | -4.31483721 | -1.72648987 |
| B | -0.79805474 | -1.29045647 | -1.72398772 |
| B | -0.80515868 | -4.31483721 | 1.72648987  |
| B | 0.79805474  | -1.29045647 | 1.72398772  |
| B | 1.57145577  | -2.80298274 | 1.67686773  |
| B | -3.22739760 | -2.80453925 | 0.88096804  |
| B | -1.57908610 | -2.80519090 | 1.67863095  |
| B | 3.22082940  | -2.80262811 | 0.88349251  |
| B | -1.57145577 | -2.80298274 | -1.67686773 |
| B | 3.22739760  | -2.80453925 | -0.88096804 |
| B | 1.57908610  | -2.80519090 | -1.67863095 |
| B | -3.22082940 | -2.80262811 | -0.88349251 |
| B | -2.47978980 | -1.40353685 | 1.69371066  |
| B | 2.47978980  | -1.40353685 | -1.69371066 |
| B | -2.47549779 | -1.40003752 | -1.69548352 |
| B | 2.47549779  | -1.40003752 | 1.69548352  |
| B | -0.00283266 | -2.80343262 | 0.85356579  |
| B | 0.00283266  | -2.80343262 | -0.85356579 |
| B | -5.76474480 | -4.10902610 | 1.71186310  |
| B | -4.15945853 | -7.12368358 | 1.72087258  |
| B | -4.14692878 | -4.10287789 | -1.71692255 |
| B | -5.73901287 | -7.11252327 | -1.73631890 |
| B | -4.13957103 | -7.12173882 | -1.72689252 |
| B | -5.74734433 | -4.09871477 | -1.71720481 |
| B | -5.76260978 | -7.11894241 | 1.73522865  |
| B | -4.16109568 | -4.10514332 | 1.71407150  |
| B | -3.38334443 | -5.61441510 | 1.66920398  |
| B | -8.20284776 | -5.62835560 | 0.87946148  |



|   |              |              |             |
|---|--------------|--------------|-------------|
| B | -6.53768240  | -5.61353412  | 1.67416427  |
| B | -1.73262119  | -5.61391028  | 0.88317979  |
| B | -6.51567951  | -5.60582122  | -1.67163276 |
| B | -1.72297083  | -5.61166293  | -0.88136551 |
| B | -3.36959312  | -5.61142465  | -1.66892169 |
| B | -8.17909202  | -5.62370117  | -0.89153849 |
| B | -7.44588618  | -4.21776776  | 1.69065385  |
| B | -2.47020166  | -4.20773768  | -1.69683391 |
| B | -7.42166650  | -4.20894620  | -1.69240311 |
| B | -2.48251022  | -4.21077089  | 1.69495947  |
| B | -4.95863514  | -5.61729393  | 0.85298610  |
| B | -4.94519274  | -5.61460415  | -0.85279425 |
| B | -10.75106449 | -7.03047196  | 1.74120276  |
| B | -9.09791978  | -9.90636788  | 1.70976146  |
| B | -9.09102053  | -6.93672837  | -1.73908613 |
| B | -10.71308884 | -9.95889183  | -1.92933437 |
| B | -9.06582628  | -9.89771573  | -1.81661065 |
| B | -10.69924911 | -7.00070221  | -1.78373791 |
| B | -10.77254362 | -9.97292790  | 1.73733973  |
| B | -9.13051523  | -6.95328365  | 1.69196840  |
| B | -8.32050493  | -8.41116028  | 1.66908533  |
| B | -13.37476243 | -8.60614742  | 1.39800753  |
| B | -11.54315099 | -8.53175241  | 1.63213432  |
| B | -6.67171052  | -8.41761062  | 0.88208796  |
| B | -11.48316360 | -8.51527464  | -1.75242404 |
| B | -6.65748674  | -8.41492560  | -0.89340040 |
| B | -8.28852016  | -8.40250221  | -1.70788262 |
| B | -13.26409195 | -8.61945325  | -1.49599052 |
| B | -12.39756441 | -7.10828384  | 1.72972189  |
| B | -7.40887498  | -6.99692134  | -1.73548272 |
| B | -12.34101623 | -7.10213015  | -1.77853465 |
| B | -7.43731984  | -7.00549958  | 1.71606619  |
| B | -9.87337237  | -8.46533763  | 0.81180613  |
| B | -9.85199147  | -8.46150516  | -0.89172295 |
| B | -11.66121052 | -11.47814868 | 1.43613793  |
| B | -11.61722471 | -11.41037732 | -1.49940003 |
| B | -12.40842892 | -10.00152872 | -1.70025378 |
| B | -12.48518735 | -10.02204695 | 1.45628503  |
| B | 14.02216479  | 1.44887655   | 1.75830653  |
| B | 15.62655994  | -1.45927870  | 1.90020170  |
| B | 15.62655994  | 1.45927870   | -1.90020170 |
| B | 14.02216479  | -1.44887655  | -1.75830653 |
| B | 13.99108660  | 1.44167578   | -1.82521667 |

|   |             |             |             |
|---|-------------|-------------|-------------|
| B | 13.99108660 | -1.44167578 | 1.82521667  |
| B | 16.39524814 | 0.00116674  | 1.68192031  |
| B | 11.60906440 | -0.00032782 | 0.88946438  |
| B | 13.20263748 | 0.00304298  | 1.66222385  |
| B | 18.12167237 | -0.00814705 | 1.43695960  |
| B | 13.20263748 | -0.00304298 | -1.66222385 |
| B | 11.60906440 | 0.00032782  | -0.88946438 |
| B | 12.32751667 | 1.40996665  | 1.72161058  |
| B | 17.30393871 | 1.48864550  | -1.74059396 |
| B | 12.31196797 | 1.40866586  | -1.74869636 |
| B | 17.34269397 | 1.40778207  | 1.85805131  |
| B | 14.76641740 | -0.01074570 | 0.86025054  |
| B | 9.09227959  | -1.30397892 | 1.71405045  |
| B | 10.69601134 | -4.34182499 | 1.72915759  |
| B | 10.69306614 | -1.33648354 | -1.72351268 |
| B | 9.12914167  | -4.32384763 | -1.70532636 |
| B | 10.73735009 | -4.34988338 | -1.73529878 |
| B | 9.10296240  | -1.31084602 | -1.71250382 |
| B | 9.09801944  | -4.32340982 | 1.71681105  |
| B | 10.67955115 | -1.32878864 | 1.72897907  |
| B | 11.47695318 | -2.84152815 | 1.74180352  |
| B | 6.67967412  | -2.80363905 | 0.88106109  |
| B | 8.32717520  | -2.81306321 | 1.66962521  |
| B | 13.13010954 | -2.80372303 | 0.88535122  |
| B | 8.34146517  | -2.82022681 | -1.66461573 |
| B | 13.14689484 | -2.77584242 | -0.83683803 |
| B | 11.51305116 | -2.84656116 | -1.71776031 |
| B | 6.68997082  | -2.81006985 | -0.88337295 |
| B | 7.42499283  | -1.40333140 | 1.69441437  |
| B | 12.32751667 | -1.40996665 | -1.72161058 |
| B | 7.43440126  | -1.41027186 | -1.69659927 |
| B | 12.31196797 | -1.40866586 | 1.74869636  |
| B | 9.91260670  | -2.82534999 | 0.85815825  |
| B | 9.92310443  | -2.83029797 | -0.85466460 |
| B | 4.14692878  | -4.10287789 | 1.71692255  |
| B | 5.73901287  | -7.11252327 | 1.73631890  |
| B | 5.76474480  | -4.10902610 | -1.71186310 |
| B | 4.15945853  | -7.12368358 | -1.72087258 |
| B | 5.76260978  | -7.11894241 | -1.73522865 |
| B | 4.16109568  | -4.10514332 | -1.71407150 |
| B | 4.13957103  | -7.12173882 | 1.72689252  |
| B | 5.74734433  | -4.09871477 | 1.71720481  |
| B | 6.51567951  | -5.60582122 | 1.67163276  |

|   |             |              |             |
|---|-------------|--------------|-------------|
| B | 1.72297083  | -5.61166293  | 0.88136551  |
| B | 3.36959312  | -5.61142465  | 1.66892169  |
| B | 8.17909202  | -5.62370117  | 0.89153849  |
| B | 3.38334443  | -5.61441510  | -1.66920398 |
| B | 8.20284776  | -5.62835560  | -0.87946148 |
| B | 6.53768240  | -5.61353412  | -1.67416427 |
| B | 1.73262119  | -5.61391028  | -0.88317979 |
| B | 2.47020166  | -4.20773768  | 1.69683391  |
| B | 7.44588618  | -4.21776776  | -1.69065385 |
| B | 2.48251022  | -4.21077089  | -1.69495947 |
| B | 7.42166650  | -4.20894620  | 1.69240311  |
| B | 4.94519274  | -5.61460415  | 0.85279425  |
| B | 4.95863514  | -5.61729393  | -0.85298610 |
| B | -0.81011277 | -6.91725911  | 1.70860940  |
| B | 0.79270011  | -9.94148178  | 1.73099232  |
| B | 0.81011277  | -6.91725911  | -1.70860940 |
| B | -0.79270011 | -9.94148178  | -1.73099232 |
| B | 0.80477481  | -9.94292113  | -1.72426536 |
| B | -0.79484518 | -6.91624840  | -1.71030232 |
| B | -0.80477481 | -9.94292113  | 1.72426536  |
| B | 0.79484518  | -6.91624840  | 1.71030232  |
| B | 1.56465714  | -8.42454810  | 1.67101784  |
| B | -3.24142510 | -8.43511629  | 0.88263468  |
| B | -1.58023264 | -8.42714351  | 1.66866575  |
| B | 3.22621308  | -8.43163859  | 0.88601801  |
| B | -1.56465714 | -8.42454810  | -1.67101784 |
| B | 3.24142510  | -8.43511629  | -0.88263468 |
| B | 1.58023264  | -8.42714351  | -1.66866575 |
| B | -3.22621308 | -8.43163859  | -0.88601801 |
| B | -2.48444581 | -7.02277327  | 1.69717157  |
| B | 2.48444581  | -7.02277327  | -1.69717157 |
| B | -2.46734334 | -7.01916448  | -1.69653960 |
| B | 2.46734334  | -7.01916448  | 1.69653960  |
| B | -0.00602891 | -8.42922876  | 0.85161903  |
| B | 0.00602891  | -8.42922876  | -0.85161903 |
| B | -5.75291923 | -9.72612308  | 1.76767544  |
| B | -4.14848161 | -12.70710907 | 1.78341146  |
| B | -4.13787386 | -9.73998005  | -1.73545182 |
| B | -5.80310740 | -12.70072665 | -1.77097447 |
| B | -4.14829776 | -12.69674516 | -1.76277230 |
| B | -5.73189478 | -9.72363310  | -1.77907256 |
| B | -5.78692317 | -12.70594872 | 1.80749689  |
| B | -4.15357907 | -9.74824470  | 1.72391018  |

|   |              |              |             |
|---|--------------|--------------|-------------|
| B | -3.36211058  | -11.23475976 | 1.68781855  |
| B | -8.14585159  | -11.14993328 | 0.83367684  |
| B | -6.57898901  | -11.23083075 | 1.77504076  |
| B | -1.72915200  | -11.25340570 | 0.88147341  |
| B | -6.57059961  | -11.23140419 | -1.77754266 |
| B | -1.72513275  | -11.25080454 | -0.89103805 |
| B | -3.35889712  | -11.23122431 | -1.69759838 |
| B | -8.12847126  | -11.12427875 | -0.86160011 |
| B | -7.40302798  | -9.78666151  | 1.69662565  |
| B | -2.45420640  | -9.82679640  | -1.69121179 |
| B | -7.37417308  | -9.78081980  | -1.71276914 |
| B | -2.46649136  | -9.82878003  | 1.69434601  |
| B | -4.96213706  | -11.26312868 | 0.86066698  |
| B | -4.96088193  | -11.26645993 | -0.85807175 |
| B | -10.82396211 | -12.88950738 | 1.49726859  |
| B | -9.01186581  | -15.69851056 | 1.41141105  |
| B | -9.17836127  | -12.93232325 | -2.20068094 |
| B | -9.16737172  | -12.87351589 | 2.07551565  |
| B | -8.23703520  | -14.19863634 | 1.62729723  |
| B | -6.61770461  | -13.97717733 | 0.87519639  |
| B | -6.61790245  | -13.98963906 | -0.84948009 |
| B | -8.23296202  | -14.19957159 | -1.69686011 |
| B | -7.48882555  | -12.62374500 | 1.66172751  |
| B | -9.90322311  | -14.25244127 | 1.40922297  |
| B | -9.96430195  | -14.26513009 | -1.48013895 |
| B | 16.52624998  | -2.93370283  | 1.53781469  |
| B | 16.65248697  | -2.89941064  | -1.46025620 |
| B | 17.30393871  | -1.48864550  | 1.74059396  |
| B | 17.34269397  | -1.40778207  | -1.85805131 |
| B | 14.02148669  | -4.32960247  | 1.93054507  |
| B | 15.83230271  | -4.35192457  | -1.61934643 |
| B | 14.13263663  | -4.35521122  | -1.96123948 |
| B | 14.15241304  | -7.25516373  | 1.63299434  |
| B | 15.73030877  | -4.36642706  | 1.65390503  |
| B | 11.57781680  | -5.67075480  | 0.88848537  |
| B | 13.22362976  | -5.73417742  | 1.63344195  |
| B | 13.28275657  | -5.71760572  | -1.52472243 |
| B | 12.35120565  | -4.27874787  | 1.77551271  |
| B | 12.41948536  | -4.26354740  | -1.73287491 |
| B | 14.93438210  | -5.79445676  | 1.52092419  |
| B | 15.01353683  | -5.79001422  | -1.47028427 |
| B | 9.09102053   | -6.93672837  | 1.73908613  |
| B | 10.71308884  | -9.95889183  | 1.92933437  |

|   |             |              |             |
|---|-------------|--------------|-------------|
| B | 10.75106449 | -7.03047196  | -1.74120276 |
| B | 9.09791978  | -9.90636788  | -1.70976146 |
| B | 10.77254362 | -9.97292790  | -1.73733973 |
| B | 9.13051523  | -6.95328365  | -1.69196840 |
| B | 9.06582628  | -9.89771573  | 1.81661065  |
| B | 10.69924911 | -7.00070221  | 1.78373791  |
| B | 11.48316360 | -8.51527464  | 1.75242404  |
| B | 6.65748674  | -8.41492560  | 0.89340040  |
| B | 8.28852016  | -8.40250221  | 1.70788262  |
| B | 13.26409195 | -8.61945325  | 1.49599052  |
| B | 8.32050493  | -8.41116028  | -1.66908533 |
| B | 13.37476243 | -8.60614742  | -1.39800753 |
| B | 11.54315099 | -8.53175241  | -1.63213432 |
| B | 6.67171052  | -8.41761062  | -0.88208796 |
| B | 7.40887498  | -6.99692134  | 1.73548272  |
| B | 12.39756441 | -7.10828384  | -1.72972189 |
| B | 7.43731984  | -7.00549958  | -1.71606619 |
| B | 12.34101623 | -7.10213015  | 1.77853465  |
| B | 9.85199147  | -8.46150516  | 0.89172295  |
| B | 9.87337237  | -8.46533763  | -0.81180613 |
| B | 4.13787386  | -9.73998005  | 1.73545182  |
| B | 5.80310740  | -12.70072665 | 1.77097447  |
| B | 5.75291923  | -9.72612308  | -1.76767544 |
| B | 4.14848161  | -12.70710907 | -1.78341146 |
| B | 5.78692317  | -12.70594872 | -1.80749689 |
| B | 4.15357907  | -9.74824470  | -1.72391018 |
| B | 4.14829776  | -12.69674516 | 1.76277230  |
| B | 5.73189478  | -9.72363310  | 1.77907256  |
| B | 6.57059961  | -11.23140419 | 1.77754266  |
| B | 1.72513275  | -11.25080454 | 0.89103805  |
| B | 3.35889712  | -11.23122431 | 1.69759838  |
| B | 8.12847126  | -11.12427875 | 0.86160011  |
| B | 3.36211058  | -11.23475976 | -1.68781855 |
| B | 8.14585159  | -11.14993328 | -0.83367684 |
| B | 6.57898901  | -11.23083075 | -1.77504076 |
| B | 1.72915200  | -11.25340570 | -0.88147341 |
| B | 2.45420640  | -9.82679640  | 1.69121179  |
| B | 7.40302798  | -9.78666151  | -1.69662565 |
| B | 2.46649136  | -9.82878003  | -1.69434601 |
| B | 7.37417308  | -9.78081980  | 1.71276914  |
| B | 4.96088193  | -11.26645993 | 0.85807175  |
| B | 4.96213706  | -11.26312868 | -0.86066698 |
| B | -0.81203100 | -12.60082212 | 1.74216886  |

|   |             |              |             |
|---|-------------|--------------|-------------|
| B | 0.80935794  | -15.65371416 | 1.45387902  |
| B | 0.81337700  | -15.66225536 | -1.48760349 |
| B | -0.81088876 | -12.59441742 | -1.74045819 |
| B | -0.81337700 | -15.66225536 | 1.48760349  |
| B | 0.81088876  | -12.59441742 | 1.74045819  |
| B | 1.63522236  | -14.09261323 | 1.53947563  |
| B | -3.27641360 | -13.99639420 | 0.86709038  |
| B | -1.62529558 | -14.09838865 | 1.54391668  |
| B | 3.28692739  | -13.98825278 | 0.85679260  |
| B | -1.63522236 | -14.09261323 | -1.53947563 |
| B | 3.27641360  | -13.99639420 | -0.86709038 |
| B | 1.62529558  | -14.09838865 | -1.54391668 |
| B | -3.28692739 | -13.98825278 | -0.85679260 |
| B | -2.44320757 | -12.64168008 | 1.74564337  |
| B | 2.44320757  | -12.64168008 | -1.74564337 |
| B | -2.44218138 | -12.64271719 | -1.76303835 |
| B | 2.44218138  | -12.64271719 | 1.76303835  |
| B | 0.00510975  | -13.98668619 | 0.85344813  |
| B | -0.00510975 | -13.98668619 | -0.85344813 |
| B | -5.69742586 | -15.81117476 | 1.48678327  |
| B | -5.74713896 | -15.73798446 | -1.42287781 |
| B | -4.09592794 | -15.69203131 | 1.49131387  |
| B | -7.31755776 | -15.64071108 | 1.44518817  |
| B | -2.45135343 | -15.65088188 | -1.48468176 |
| B | -7.37914945 | -15.63932782 | -1.46898426 |
| B | -2.45030035 | -15.63739838 | 1.43915866  |
| B | 11.61722471 | -11.41037732 | 1.49940003  |
| B | 11.66121052 | -11.47814868 | -1.43613793 |
| B | 12.40842892 | -10.00152872 | 1.70025378  |
| B | 12.48518735 | -10.02204695 | -1.45628503 |
| B | 9.17836127  | -12.93232325 | 2.20068094  |
| B | 10.82396211 | -12.88950738 | -1.49726859 |
| B | 9.07223059  | -15.73707411 | 1.18281478  |
| B | 10.74207676 | -12.78891526 | 1.47027924  |
| B | 6.61790245  | -13.98963906 | 0.84948009  |
| B | 8.23296202  | -14.19957159 | 1.69686011  |
| B | 8.23703520  | -14.19863634 | -1.62729723 |
| B | 6.61770461  | -13.97717733 | -0.87519639 |
| B | 7.51254400  | -12.63309521 | 1.61976602  |
| B | 9.96430195  | -14.26513009 | 1.48013895  |
| B | 9.90322311  | -14.25244127 | -1.40922297 |
| B | 5.69742586  | -15.81117476 | -1.48678327 |
| B | 5.74713896  | -15.73798446 | 1.42287781  |

|   |              |              |             |
|---|--------------|--------------|-------------|
| B | 2.45135343   | -15.65088188 | 1.48468176  |
| B | 7.31755776   | -15.64071108 | -1.44518817 |
| B | 2.45030035   | -15.63739838 | -1.43915866 |
| B | 7.37914945   | -15.63932782 | 1.46898426  |
| B | 16.39524814  | -0.00116674  | -1.68192031 |
| B | 15.67421797  | -1.46998741  | -1.93954117 |
| B | 9.16737172   | -12.87351589 | -2.07551565 |
| B | 16.52624998  | 2.93370283   | -1.53781469 |
| B | 16.65248697  | 2.89941064   | 1.46025620  |
| B | 18.12167237  | 0.00814705   | -1.43695960 |
| B | 14.76641740  | 0.01074570   | -0.86025054 |
| B | 14.15089243  | -7.20052466  | -1.70576086 |
| B | 11.61780303  | -5.64904115  | -0.88172286 |
| B | 14.15241304  | 7.25516373   | -1.63299434 |
| B | 12.35120565  | 4.27874787   | -1.77551271 |
| B | 9.85199147   | 8.46150516   | -0.89172295 |
| B | 7.51254400   | 12.63309521  | -1.61976602 |
| B | 9.07223059   | 15.73707411  | -1.18281478 |
| B | 7.48882555   | -12.62374500 | -1.66172751 |
| B | 9.01186581   | -15.69851056 | -1.41141105 |
| B | 0.81203100   | -12.60082212 | -1.74216886 |
| B | -0.80935794  | -15.65371416 | -1.45387902 |
| B | -7.51254400  | -12.63309521 | -1.61976602 |
| B | -9.07223059  | -15.73707411 | -1.18281478 |
| B | -0.81203100  | 12.60082212  | -1.74216886 |
| B | 0.81088876   | 12.59441742  | -1.74045819 |
| B | 0.80935794   | 15.65371416  | -1.45387902 |
| B | -9.01186581  | 15.69851056  | -1.41141105 |
| B | -7.48882555  | 12.62374500  | -1.66172751 |
| B | -11.61780303 | 5.64904115   | -0.88172286 |
| B | -14.15089243 | 7.20052466   | -1.70576086 |
| B | -14.76641740 | -0.01074570  | -0.86025054 |
| B | -18.12167237 | -0.00814705  | -1.43695960 |
| B | -11.57781680 | -5.67075480  | -0.88848537 |
| B | -14.93438210 | -5.79445676  | -1.52092419 |
| B | 9.01186581   | 15.69851056  | 1.41141105  |
| B | -4.93968341  | -14.14356919 | 1.49386256  |
| B | 4.10066125   | -15.65875150 | 1.46436461  |
| B | 4.93990131   | -14.15156505 | 1.54232140  |
| B | 4.09592794   | -15.69203131 | -1.49131387 |
| B | 4.93968341   | -14.14356919 | -1.49386256 |
| B | -4.10066125  | -15.65875150 | -1.46436461 |
| B | -4.93990131  | -14.15156505 | -1.54232140 |

|   |              |              |             |
|---|--------------|--------------|-------------|
| B | -14.83407722 | -2.90350937  | 1.61683529  |
| B | -14.79052835 | -2.90935998  | -1.70336805 |
| B | -9.84143193  | -11.38534551 | 1.73049712  |
| B | -10.74207676 | -12.78891526 | -1.47027924 |
| B | -9.75902629  | -11.40717510 | -1.73639059 |
| B | -16.65248697 | 2.89941064   | -1.46025620 |
| B | -14.83407722 | 2.90350937   | -1.61683529 |
| B | -14.79052835 | 2.90935998   | 1.70336805  |
| B | 9.75902629   | -11.40717510 | 1.73639059  |
| B | 9.84143193   | -11.38534551 | -1.73049712 |
| B | 14.83407722  | -2.90350937  | -1.61683529 |
| B | 14.79052835  | -2.90935998  | 1.70336805  |
| B | 15.67421797  | 1.46998741   | 1.93954117  |
| B | 14.83407722  | 2.90350937   | 1.61683529  |
| B | 14.79052835  | 2.90935998   | -1.70336805 |
| B | 11.61722471  | 11.41037732  | -1.49940003 |
| B | 9.75902629   | 11.40717510  | -1.73639059 |
| B | 9.84143193   | 11.38534551  | 1.73049712  |
| B | 4.93968341   | 14.14356919  | 1.49386256  |
| B | 6.61790245   | 13.98963906  | -0.84948009 |
| B | 4.93990131   | 14.15156505  | -1.54232140 |
| B | -4.93968341  | 14.14356919  | -1.49386256 |
| B | -4.93990131  | 14.15156505  | 1.54232140  |
| B | -8.12847126  | 11.12427875  | 0.86160011  |
| B | -9.75902629  | 11.40717510  | 1.73639059  |
| B | -9.84143193  | 11.38534551  | -1.73049712 |
| B | 10.66707880  | 15.52943781  | -0.60000855 |
| B | 11.08759957  | 13.99184322  | -0.07180172 |
| B | 12.03109760  | 12.59814022  | -0.12233205 |
| B | 12.80916090  | 11.18332648  | -0.08394818 |
| B | 13.70400059  | 9.77833677   | -0.01626795 |
| B | 14.46115817  | 8.35343862   | -0.10015608 |
| B | 15.45860012  | 7.02175378   | -0.35040218 |
| B | 16.08069317  | 5.52891085   | -0.02424530 |
| B | 17.04385943  | 4.19865057   | -0.35223317 |
| B | 17.67070899  | 2.73637261   | -0.07549897 |
| B | 18.49573003  | 1.39243337   | -0.46029245 |
| B | 19.14386282  | -0.00000000  | -0.00000000 |
| B | 9.73405276   | 16.63610243  | 0.13567517  |
| B | 18.49573003  | -1.39243337  | 0.46029245  |
| B | 17.67070899  | -2.73637261  | 0.07549897  |
| B | 17.04385943  | -4.19865057  | 0.35223317  |
| B | 16.08069317  | -5.52891085  | 0.02424530  |



|   |              |              |             |
|---|--------------|--------------|-------------|
| B | 15.45860012  | -7.02175378  | 0.35040218  |
| B | 14.46115817  | -8.35343862  | 0.10015608  |
| B | 13.70400059  | -9.77833677  | 0.01626795  |
| B | 12.80916090  | -11.18332648 | 0.08394818  |
| B | 12.03109760  | -12.59814022 | 0.12233205  |
| B | 11.08759957  | -13.99184322 | 0.07180172  |
| B | 10.66707880  | -15.52943781 | 0.60000855  |
| B | 9.73405276   | -16.63610243 | -0.13567517 |
| B | 8.15288262   | -16.74803397 | -0.00534528 |
| B | 6.53822776   | -16.67928390 | -0.03211847 |
| B | 4.88239050   | -16.63993007 | 0.00269046  |
| B | 3.26669089   | -16.75643248 | 0.03339970  |
| B | 1.63522964   | -16.56769463 | 0.01293444  |
| B | 0.00000000   | -16.74427349 | 0.00000000  |
| B | -1.63522964  | -16.56769463 | -0.01293444 |
| B | -3.26669089  | -16.75643248 | -0.03339970 |
| B | -4.88239050  | -16.63993007 | -0.00269046 |
| B | -6.53822776  | -16.67928390 | 0.03211847  |
| B | -8.15288262  | -16.74803397 | 0.00534528  |
| B | -9.73405276  | -16.63610243 | 0.13567517  |
| B | -10.66707880 | -15.52943781 | -0.60000855 |
| B | -11.08759957 | -13.99184322 | -0.07180172 |
| B | -12.03109760 | -12.59814022 | -0.12233205 |
| B | -12.80916090 | -11.18332648 | -0.08394818 |
| B | -13.70400059 | -9.77833677  | -0.01626795 |
| B | -14.46115817 | -8.35343862  | -0.10015608 |
| B | -15.45860012 | -7.02175378  | -0.35040218 |
| B | -16.08069317 | -5.52891085  | -0.02424530 |
| B | -17.04385943 | -4.19865057  | -0.35223317 |
| B | -17.67070899 | -2.73637261  | -0.07549897 |
| B | -18.49573003 | -1.39243337  | -0.46029245 |
| B | -19.14386282 | -0.00000000  | -0.00000000 |
| B | -18.49573003 | 1.39243337   | 0.46029245  |
| B | -17.67070899 | 2.73637261   | 0.07549897  |
| B | -17.04385943 | 4.19865057   | 0.35223317  |
| B | -16.08069317 | 5.52891085   | 0.02424530  |
| B | -15.45860012 | 7.02175378   | 0.35040218  |
| B | -14.46115817 | 8.35343862   | 0.10015608  |
| B | -13.70400059 | 9.77833677   | 0.01626795  |
| B | -12.80916090 | 11.18332648  | 0.08394818  |
| B | -12.03109760 | 12.59814022  | 0.12233205  |
| B | -11.08759957 | 13.99184322  | 0.07180172  |
| B | -10.66707880 | 15.52943781  | 0.60000855  |

|   |             |             |             |
|---|-------------|-------------|-------------|
| B | -9.73405276 | 16.63610243 | -0.13567517 |
| B | -8.15288262 | 16.74803397 | -0.00534528 |
| B | -6.53822776 | 16.67928390 | -0.03211847 |
| B | -4.88239050 | 16.63993007 | 0.00269046  |
| B | -3.26669089 | 16.75643248 | 0.03339970  |
| B | -1.63522964 | 16.56769463 | 0.01293444  |
| B | -0.00000000 | 16.74427349 | 0.00000000  |
| B | 1.63522964  | 16.56769463 | -0.01293444 |
| B | 3.26669089  | 16.75643248 | -0.03339970 |
| B | 4.88239050  | 16.63993007 | -0.00269046 |
| B | 6.53822776  | 16.67928390 | 0.03211847  |
| B | 8.15288262  | 16.74803397 | 0.00534528  |
